# Supplementary material
Source: PubMed Central journal article supplement (PMC9448801)
Supplement: 41467_2022_32786_MOESM1_ESM.pdf [file 41467_2022_32786_MOESM1_ESM.pdf]

**SUPPLEMENTAL MATERIALS**

**SUPPLEMENTAL TABLES**

|                                                                                                                                          | Mean unadjusted<br>difference in Orf1b Ct<br>value (95% CI) | p-value <sup>‡</sup>        | Mean adjusted<br>difference in Orf1b Ct<br>value (95% CI)* | p-value <sup>‡</sup>        |
|------------------------------------------------------------------------------------------------------------------------------------------|-------------------------------------------------------------|-----------------------------|------------------------------------------------------------|-----------------------------|
| <b>All Omicron positive individuals, adjusted for age, symptoms, and average RNase P gene value<br/>N=1,688 (BA.1 = 1664, BA.2 = 24)</b> |                                                             |                             |                                                            |                             |
| Lineage (BA.1 vs. BA.2)                                                                                                                  | 0.47 (-0.94, 1.88)                                          | 0.51                        | -0.04 (-1.34, 1.26)                                        | 0.95                        |
| Age (years)                                                                                                                              | -0.02 (-0.04, 0.002)                                        | 0.09                        | -0.01 (-0.03, 0.003)                                       | 0.11                        |
| Symptoms (symptomatic vs.<br>asymptomatic)                                                                                               | -1.06 (-1.49, -0.63)                                        | <b>1.3X10<sup>-6</sup></b>  | -1.25 (-1.65, -0.85)                                       | <b>7.8X10<sup>-10</sup></b> |
| Average RNase P gene<br>value                                                                                                            | 0.38 (0.33, 0.42)                                           | <b>7.4X10<sup>-56</sup></b> | 0.38 (0.34, 0.43)                                          | <b>1.1X10<sup>-58</sup></b> |

Supplemental Table 1. **Cycle threshold comparisons by Omicron lineage (BA.1 vs. BA.2).**

\*Mean adjusted differences estimated using multiple linear regression of average Orf1b Ct value on lineage (BA.1 vs. BA.2) adjusted for age, symptoms, and average RNase P gene value. Regression was restricted to Omicron cases detected using RHINOstic™ swabs (42 Omicron cases detected using US Cotton #3 swabs).

<sup>‡</sup>Two-sided *t* statistic with significance level of 0.05.

| Characteristic, N (%)                                          | Cluster   |           |           | p-value      |
|----------------------------------------------------------------|-----------|-----------|-----------|--------------|
|                                                                | One       | Two       | Three     |              |
| Student                                                        | 35 (100)  | 22 (100)  | 66 (100)  | N/A          |
| Male                                                           | 7 (20.0)  | 13 (59.1) | 27 (40.9) | <b>0.009</b> |
| Resident of on-campus housing                                  | 2 (5.70)  | 8 (36.4)  | 4 (6.10)  | <b>0.001</b> |
| Fraternity or sorority member                                  | 25 (71.4) | 7 (31.8)  | 46 (69.7) | <b>0.004</b> |
| Completion of COVID-19 vaccination primary series <sup>2</sup> | 21 (60.0) | 14 (63.6) | 42 (63.6) | 0.22         |

Supplemental Table 2. **Demographic characteristics of three Delta infection clusters**<sup>1</sup>.

<sup>1</sup>Proportions between clusters compared using Fisher's exact tests.

<sup>2</sup>Vaccination status unknown for 37.1%, 31.8%, and 34.8% of individuals in clusters 1, 2, and 3, respectively.

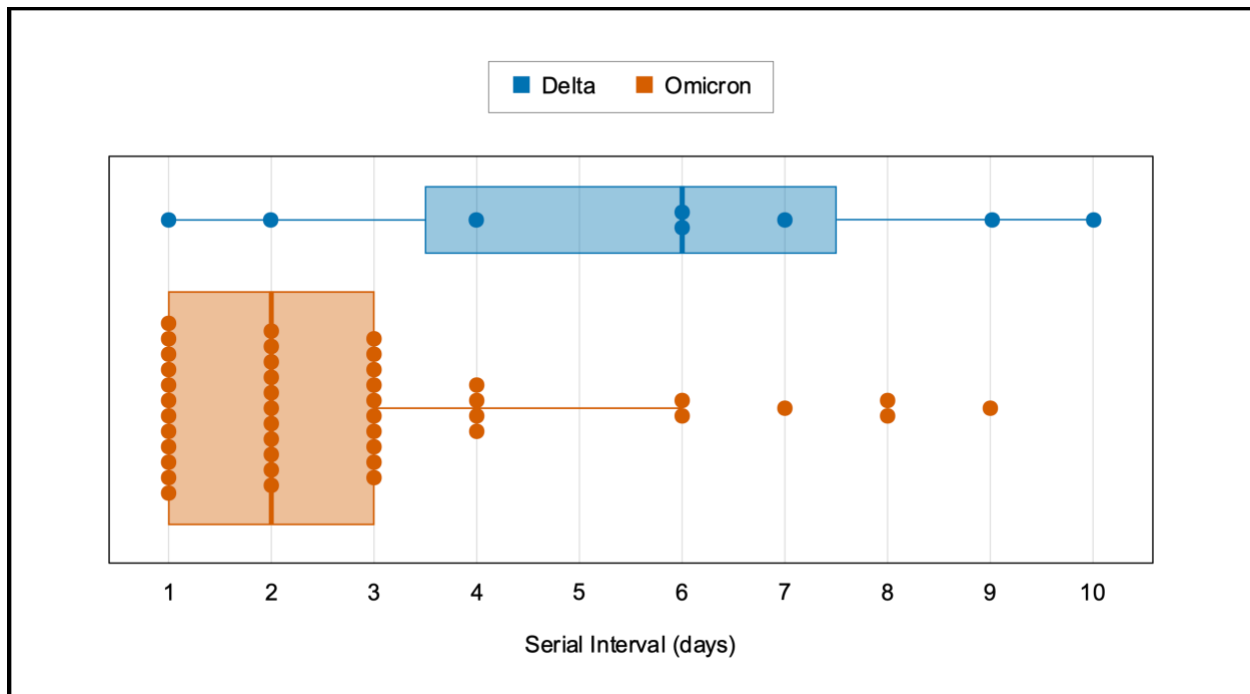

Supplemental Figure 1. **Serial intervals of Delta and Omicron transmission clusters.** Serial intervals are displayed for each subsequent case in symptomatic clusters of SARS-CoV-2 positive individuals with identical genomes and sharing the same address. The primary case of each cluster was identified by the earliest symptom onset date within the cluster. Serial interval was defined as the number of days between symptom onset of a symptomatic primary case and each subsequent symptomatic case within the cluster. Centerlines represent the median serial interval for each variant (Delta: 6 days, Omicron: 2 days), with boxes bound by the 25th and 75th percentiles (Delta: 3.5-7.5 days, Omicron: 1-3 days), and whiskers extending to 1.5 times the interquartile range below the 25th percentile (Delta: 1 day), and above the 75th percentile (Delta: 10 days, Omicron: 6 days). Minimum serial interval was 1 day for both variants; maximum was 10 days for Delta and 9 days for Omicron.

**A**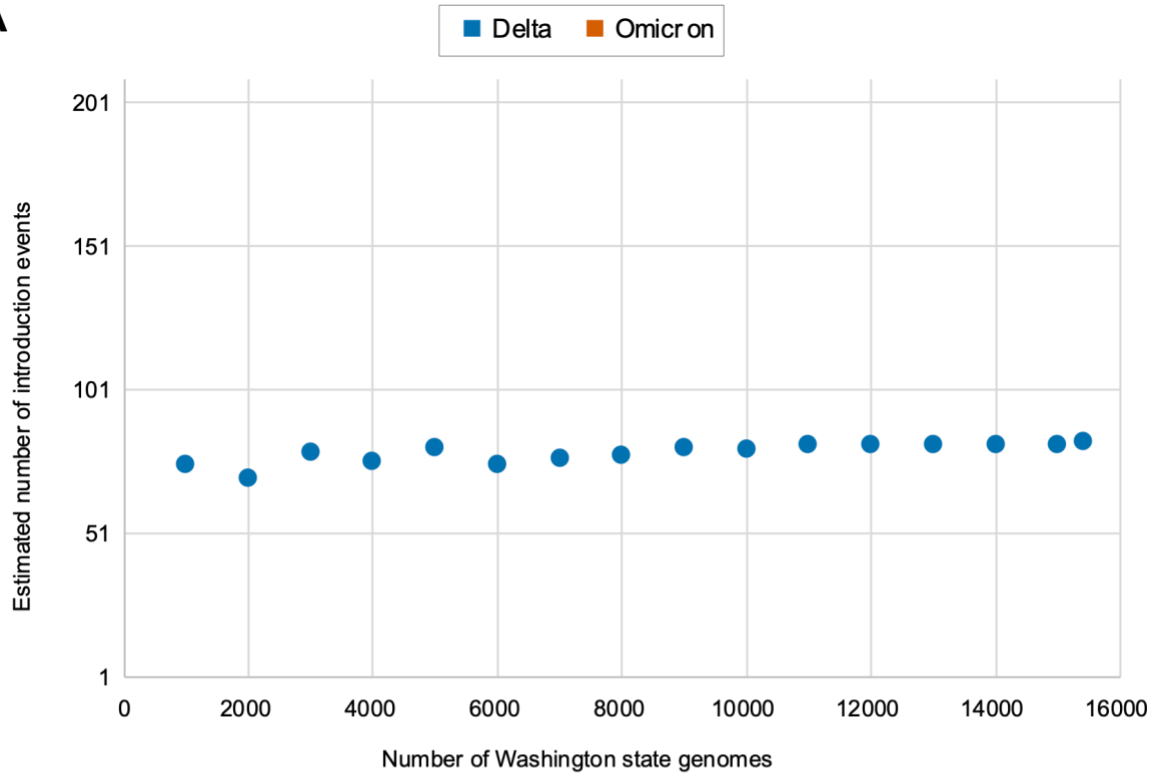**B**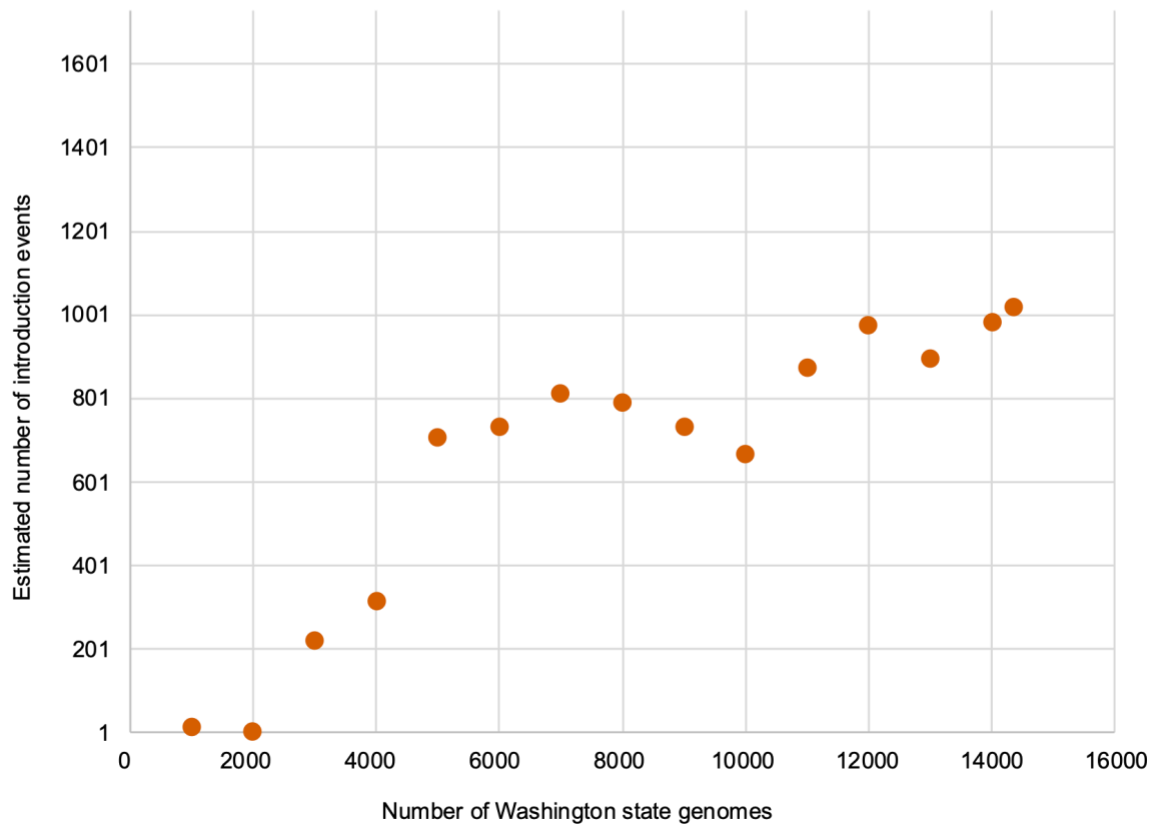

Supplemental Figure 2. **Accuracy analysis of number of Delta (A) and Omicron (B) introduction events onto campus represented by sequenced genomes.** Sample size of the pool of non-study Washington state genomes used in each analysis is on the x-axis and the resulting estimate for the number of introduction event of each variant onto campus for each analysis is on the y-axis. In (A), the vertical axis varies from 1 to 209, the full range of possible values for the introduction number estimate for this variant. Similarly, in (B), the vertical axis varies from 1 to 1,730.

## Regression Analysis R Code

```
# Husky Coronavirus Testing Delta/ Omicron Manuscript
# Multiple linear regression of CT value on omicron vs. delta

# load libraries
library(tidyverse)
library(RColorBrewer)
library(visreg)

# regression

#unadjusted regressions

# ct value on variant type
model.unadj <- lm(avg_orflb ~ who_label, data = dat)
summary(model.unadj)
model.unadj.results <- cbind(coefficient = coef(model.unadj), confint(model.unadj), p
= summary(model.unadj)$coefficients[,4] )
model.unadj.results <- as.data.frame(model.unadj.results)

# ct value on age
model.unadj2 <- lm(avg_orflb ~ age, data = dat)
summary(model.unadj2)
model.unadj.results2 <- cbind(coefficient = coef(model.unadj2), confint(model.unadj2),
p = summary(model.unadj2)$coefficients[,4] )
model.unadj.results2 <- as.data.frame(model.unadj.results2)

# ct value on sx status
model.unadj3 <- lm(avg_orflb ~ sx, data = dat)
summary(model.unadj3)
model.unadj.results3 <- cbind(coefficient = coef(model.unadj3), confint(model.unadj3),
p = summary(model.unadj3)$coefficients[,4] )
model.unadj.results3 <- as.data.frame(model.unadj.results3)

# ct value on avg RNase P gene
model.unadj4 <- lm(avg_orflb ~ avg_rnase_p, data = dat)
summary(model.unadj4)
model.unadj.results4 <- cbind(coefficient = coef(model.unadj4), confint(model.unadj4),
p = summary(model.unadj4)$coefficients[,4] )
model.unadj.results4 <- as.data.frame(model.unadj.results4)

# all omicron and delta cases
model.adj <- lm(avg_orflb ~ who_label + age + avg_rnase_p, data = dat)

summary(model.adj)
model.adj.results <- cbind(coefficient = coef(model.adj), confint(model.adj), p =
summary(model.adj)$coefficients[,4] )
model.adj.results <- as.data.frame(model.adj.results)

# symptomatic omicron and delta cases only - adjusted for days since sx onset
model.adj.sx <- lm(avg_orflb ~ who_label + age + symptoms_days + avg_rnase_p, data =
dat_sx)

summary(model.adj.sx)
model.adj.sx.results <- cbind(coefficient = coef(model.adj.sx), confint(model.adj.sx),
p = summary(model.adj.sx)$coefficients[,4] )
model.adj.sx.results <- as.data.frame(model.adj.sx.results)

# ct value on variant - symptomatic cases only
model.unadj5 <- lm(avg_orflb ~ who_label, data = dat_sx)
summary(model.unadj5)
```

```

model.unadj.results5 <- cbind(coefficient = coef(model.unadj5), confint(model.unadj5),
p = summary(model.unadj5)$coefficients[,4] )
model.unadj.results5 <- as.data.frame(model.unadj.results5)

# ct value on age - symptomatic cases only
model.unadj6 <- lm(avg_orflb ~ age, data = dat_sx)
summary(model.unadj6)
model.unadj.results6 <- cbind(coefficient = coef(model.unadj6), confint(model.unadj6),
p = summary(model.unadj6)$coefficients[,4] )
model.unadj.results6 <- as.data.frame(model.unadj.results6)

# ct value on days since sx onset - symptomatic cases only
model.unadj7 <- lm(avg_orflb ~ symptoms_days, data = dat_sx)
summary(model.unadj7)
model.unadj.results7 <- cbind(coefficient = coef(model.unadj7), confint(model.unadj7),
p = summary(model.unadj7)$coefficients[,4] )
model.unadj.results7 <- as.data.frame(model.unadj.results7)

# ct value on RNase P - symptomatic cases only
model.unadj8 <- lm(avg_orflb ~ avg_rnase_p, data = dat_sx)
summary(model.unadj8)
model.unadj.results8 <- cbind(coefficient = coef(model.unadj8), confint(model.unadj8),
p = summary(model.unadj8)$coefficients[,4] )
model.unadj.results8 <- as.data.frame(model.unadj.results8)

# among those confirmed vaxxed - adjusted for time since vax
model.adj.vax.days <- lm(avg_orflb ~ who_label + age + sx + avg_rnase_p + vax_status +
last_dose_days, data = )

summary(model.adj.vax.days)
model.adj.vax.days.results <- cbind(coefficient = coef(model.adj.vax.days),
confint(model.adj.vax.days), p = summary(model.adj.vax.days)$coefficients[,4] )
model.adj.vax.days.results <- as.data.frame(model.adj.vax.days.results)

# ct value on variant - among those confirmed vaxxed
model.unadj14 <- lm(avg_orflb ~ who_label, data = dat_vax_days)
summary(model.unadj14)
model.unadj.results14 <- cbind(coefficient = coef(model.unadj14),
confint(model.unadj14), p = summary(model.unadj14)$coefficients[,4] )
model.unadj.results14 <- as.data.frame(model.unadj.results14)

# ct value on age - among those confirmed vaxxed
model.unadj15 <- lm(avg_orflb ~ age, data = dat_vax_days)
summary(model.unadj15)
model.unadj.results15 <- cbind(coefficient = coef(model.unadj15),
confint(model.unadj15), p = summary(model.unadj15)$coefficients[,4] )
model.unadj.results15 <- as.data.frame(model.unadj.results15)

# ct value on symptom status - among those confirmed vaxxed
model.unadj16 <- lm(avg_orflb ~ sx, data = dat_vax_days)
summary(model.unadj16)
model.unadj.results16 <- cbind(coefficient = coef(model.unadj16),
confint(model.unadj16), p = summary(model.unadj16)$coefficients[,4] )
model.unadj.results16 <- as.data.frame(model.unadj.results16)

# ct value on ct value on RNase P - among those confirmed vaxxed
model.unadj17 <- lm(avg_orflb ~ avg_rnase_p, data = dat_vax_days)
summary(model.unadj17)
model.unadj.results17 <- cbind(coefficient = coef(model.unadj17),
confint(model.unadj17), p = summary(model.unadj17)$coefficients[,4] )
model.unadj.results17 <- as.data.frame(model.unadj.results17)

# ct value on ct value on vax status - among those confirmed vaxxed

```

```

model.unadj18 <- lm(avg_orflb ~ vax_status, data = dat_vax_days)
summary(model.unadj18)
model.unadj.results18 <- cbind(coefficient = coef(model.unadj18),
confint(model.unadj18), p = summary(model.unadj18)$coefficients[,4] )
model.unadj.results18 <- as.data.frame(model.unadj.results18)

# ct value on ct value on days since last vax dose - among those confirmed vaxxed
model.unadj19 <- lm(avg_orflb ~ last_dose_days, data = dat_vax_days)
summary(model.unadj19)
model.unadj.results19 <- cbind(coefficient = coef(model.unadj19),
confint(model.unadj19), p = summary(model.unadj19)$coefficients[,4] )
model.unadj.results19 <- as.data.frame(model.unadj.results19)

# all omicron cases by lineage

#unadjusted regressions
# ct value on lineage
model.unadj20 <- lm(avg_orflb ~ pangolin_lineage, data = dat_lin)
summary(model.unadj20)
model.unadj.results20 <- cbind(coefficient = coef(model.unadj20),
confint(model.unadj20), p = summary(model.unadj20)$coefficients[,4] )
model.unadj.results20 <- as.data.frame(model.unadj.results20)

# ct value on age
model.unadj21 <- lm(avg_orflb ~ age, data = dat_lin)
summary(model.unadj21)
model.unadj.results21 <- cbind(coefficient = coef(model.unadj21),
confint(model.unadj21), p = summary(model.unadj21)$coefficients[,4] )
model.unadj.results21 <- as.data.frame(model.unadj.results21)

# ct value on sx status
model.unadj22 <- lm(avg_orflb ~ sx, data = dat_lin)
summary(model.unadj22)
model.unadj.results22 <- cbind(coefficient = coef(model.unadj22),
confint(model.unadj22), p = summary(model.unadj22)$coefficients[,4] )
model.unadj.results22 <- as.data.frame(model.unadj.results22)

# ct value on avg RNase P gene
model.unadj23 <- lm(avg_orflb ~ avg_rnase_p, data = dat_lin)
summary(model.unadj23)
model.unadj.results23 <- cbind(coefficient = coef(model.unadj23),
confint(model.unadj23), p = summary(model.unadj23)$coefficients[,4] )
model.unadj.results23 <- as.data.frame(model.unadj.results23)

# adjusted
model.adj.lin <- lm(avg_orflb ~ pangolin_lineage + age + sx + avg_rnase_p, data =
dat_lin)

summary(model.adj.lin)
model.adj.results.lin <- cbind(coefficient = coef(model.adj.lin),
confint(model.adj.lin), p = summary(model.adj.lin)$coefficients[,4] )
model.adj.results.lin <- as.data.frame(model.adj.results)

```



**GenBank Accession Numbers:**

| Virus_Name                 | Variant | EPI_ISL_ID      | Genbank_ID |
|----------------------------|---------|-----------------|------------|
| hCoV-19/USA/WA-S12563/2021 | Delta   | EPI_ISL_5329370 | OK546612   |
| hCoV-19/USA/WA-S12564/2021 | Delta   | EPI_ISL_5329277 | OK546613   |
| hCoV-19/USA/WA-S12568/2021 | Delta   | EPI_ISL_5329155 | OK546617   |
| hCoV-19/USA/WA-S12567/2021 | Delta   | EPI_ISL_5329154 | OK546616   |
| hCoV-19/USA/WA-S12566/2021 | Delta   | EPI_ISL_5329332 | OK546615   |
| hCoV-19/USA/WA-S12569/2021 | Delta   | EPI_ISL_5329372 | OK546618   |
| hCoV-19/USA/WA-S12570/2021 | Delta   | EPI_ISL_5329208 | OK546619   |
| hCoV-19/USA/WA-S12572/2021 | Delta   | EPI_ISL_5329156 | OK546621   |
| hCoV-19/USA/WA-S12867/2021 | Delta   | EPI_ISL_5629257 | OP208794   |
| hCoV-19/USA/WA-S12573/2021 | Delta   | EPI_ISL_5329157 | OK546622   |
| hCoV-19/USA/WA-S11617/2021 | Delta   | EPI_ISL_4636331 | OK335515   |
| hCoV-19/USA/WA-S12576/2021 | Delta   | EPI_ISL_5329425 | OK546625   |
| hCoV-19/USA/WA-S12577/2021 | Delta   | EPI_ISL_5329158 | OK546626   |
| hCoV-19/USA/WA-S12575/2021 | Delta   | EPI_ISL_5329352 | OK546624   |
| hCoV-19/USA/WA-S12574/2021 | Delta   | EPI_ISL_5329301 | OK546623   |
| hCoV-19/USA/WA-S12580/2021 | Delta   | EPI_ISL_5329419 | OK546629   |
| hCoV-19/USA/WA-S12578/2021 | Delta   | EPI_ISL_5329251 | OK546627   |
| hCoV-19/USA/WA-S12579/2021 | Delta   | EPI_ISL_5329326 | OK546628   |
| hCoV-19/USA/WA-S12581/2021 | Delta   | EPI_ISL_5329426 | OK546630   |
| hCoV-19/USA/WA-S12899/2021 | Delta   | EPI_ISL_5629289 | OP208795   |
| hCoV-19/USA/WA-S12030/2021 | Delta   | EPI_ISL_4873599 | OK374750   |
| hCoV-19/USA/WA-S12034/2021 | Delta   | EPI_ISL_4874250 | OK374752   |
| hCoV-19/USA/WA-S12033/2021 | Delta   | EPI_ISL_4873513 | OK374751   |
| hCoV-19/USA/WA-S12037/2021 | Delta   | EPI_ISL_4873530 | OK374754   |
| hCoV-19/USA/WA-S12582/2021 | Delta   | EPI_ISL_5329159 | OK546631   |
| hCoV-19/USA/WA-S12035/2021 | Delta   | EPI_ISL_4873523 | OK374753   |
| hCoV-19/USA/WA-S12038/2021 | Delta   | EPI_ISL_4873531 | OK374755   |
| hCoV-19/USA/WA-S12586/2021 | Delta   | EPI_ISL_5329428 | OK546633   |
| hCoV-19/USA/WA-S12585/2021 | Delta   | EPI_ISL_5329160 | OK546632   |
| hCoV-19/USA/WA-S12591/2021 | Delta   | EPI_ISL_5329293 | OK546634   |
| hCoV-19/USA/WA-S12602/2021 | Delta   | EPI_ISL_5329165 | OK546645   |
| hCoV-19/USA/WA-S12594/2021 | Delta   | EPI_ISL_5329350 | OK546637   |
| hCoV-19/USA/WA-S12600/2021 | Delta   | EPI_ISL_5329164 | OK546643   |
| hCoV-19/USA/WA-S12592/2021 | Delta   | EPI_ISL_5329415 | OK546635   |
| hCoV-19/USA/WA-S12601/2021 | Delta   | EPI_ISL_5329334 | OK546644   |
| hCoV-19/USA/WA-S12595/2021 | Delta   | EPI_ISL_5329161 | OK546638   |
| hCoV-19/USA/WA-S12599/2021 | Delta   | EPI_ISL_5329259 | OK546642   |
| hCoV-19/USA/WA-S12596/2021 | Delta   | EPI_ISL_5329162 | OK546639   |
| hCoV-19/USA/WA-S12597/2021 | Delta   | EPI_ISL_5329163 | OK546640   |
| hCoV-19/USA/WA-S12593/2021 | Delta   | EPI_ISL_5329399 | OK546636   |
| hCoV-19/USA/WA-S12598/2021 | Delta   | EPI_ISL_5329276 | OK546641   |
| hCoV-19/USA/WA-S12610/2021 | Delta   | EPI_ISL_5329168 | OK546652   |
| hCoV-19/USA/WA-S12606/2021 | Delta   | EPI_ISL_5329166 | OK546648   |
| hCoV-19/USA/WA-S12616/2021 | Delta   | EPI_ISL_5329169 | OK546658   |
| hCoV-19/USA/WA-S12934/2021 | Delta   | EPI_ISL_5629324 | OP208796   |
| hCoV-19/USA/WA-S12607/2021 | Delta   | EPI_ISL_5329357 | OK546649   |
| hCoV-19/USA/WA-S12611/2021 | Delta   | EPI_ISL_5329311 | OK546653   |
| hCoV-19/USA/WA-S12612/2021 | Delta   | EPI_ISL_5329424 | OK546654   |
| hCoV-19/USA/WA-S12603/2021 | Delta   | EPI_ISL_5329078 | OK546646   |

|                            |       |                 |          |
|----------------------------|-------|-----------------|----------|
| hCoV-19/USA/WA-S12608/2021 | Delta | EPI_ISL_5329167 | OK546650 |
| hCoV-19/USA/WA-S12615/2021 | Delta | EPI_ISL_5329185 | OK546657 |
| hCoV-19/USA/WA-S12609/2021 | Delta | EPI_ISL_5329421 | OK546651 |
| hCoV-19/USA/WA-S12933/2021 | Delta | EPI_ISL_5629323 | OP208797 |
| hCoV-19/USA/WA-S12613/2021 | Delta | EPI_ISL_5329264 | OK546655 |
| hCoV-19/USA/WA-S13175/2021 | Delta | EPI_ISL_5903196 | OL333786 |
| hCoV-19/USA/WA-S12935/2021 | Delta | EPI_ISL_5629325 | OP208798 |
| hCoV-19/USA/WA-S12614/2021 | Delta | EPI_ISL_5329368 | OK546656 |
| hCoV-19/USA/WA-S12633/2021 | Delta | EPI_ISL_5329174 | OK546675 |
| hCoV-19/USA/WA-S12628/2021 | Delta | EPI_ISL_5329173 | OK546670 |
| hCoV-19/USA/WA-S12618/2021 | Delta | EPI_ISL_5329340 | OK546660 |
| hCoV-19/USA/WA-S12624/2021 | Delta | EPI_ISL_5329172 | OK546666 |
| hCoV-19/USA/WA-S12621/2021 | Delta | EPI_ISL_5329353 | OK546663 |
| hCoV-19/USA/WA-S12632/2021 | Delta | EPI_ISL_5329316 | OK546674 |
| hCoV-19/USA/WA-S12627/2021 | Delta | EPI_ISL_5329342 | OK546669 |
| hCoV-19/USA/WA-S12617/2021 | Delta | EPI_ISL_5329170 | OK546659 |
| hCoV-19/USA/WA-S12625/2021 | Delta | EPI_ISL_5329257 | OK546667 |
| hCoV-19/USA/WA-S15538/2021 | Delta | EPI_ISL_8035049 | OM003858 |
| hCoV-19/USA/WA-S12629/2021 | Delta | EPI_ISL_5329343 | OK546671 |
| hCoV-19/USA/WA-S15539/2021 | Delta | EPI_ISL_8035050 | OP209801 |
| hCoV-19/USA/WA-S12620/2021 | Delta | EPI_ISL_5329365 | OK546662 |
| hCoV-19/USA/WA-S12630/2021 | Delta | EPI_ISL_5329389 | OK546672 |
| hCoV-19/USA/WA-S12626/2021 | Delta | EPI_ISL_5329397 | OK546668 |
| hCoV-19/USA/WA-S12623/2021 | Delta | EPI_ISL_5329341 | OK546665 |
| hCoV-19/USA/WA-S15537/2021 | Delta | EPI_ISL_8035048 | OM003857 |
| hCoV-19/USA/WA-S12622/2021 | Delta | EPI_ISL_5329345 | OK546664 |
| hCoV-19/USA/WA-S12631/2021 | Delta | EPI_ISL_5329378 | OK546673 |
| hCoV-19/USA/WA-S15534/2021 | Delta | EPI_ISL_8035045 | OM003854 |
| hCoV-19/USA/WA-S12643/2021 | Delta | EPI_ISL_5329182 | OK546685 |
| hCoV-19/USA/WA-S12645/2021 | Delta | EPI_ISL_5329363 | OK546687 |
| hCoV-19/USA/WA-S12636/2021 | Delta | EPI_ISL_5329297 | OK546678 |
| hCoV-19/USA/WA-S15536/2021 | Delta | EPI_ISL_8035047 | OM003856 |
| hCoV-19/USA/WA-S12634/2021 | Delta | EPI_ISL_5329175 | OK546676 |
| hCoV-19/USA/WA-S12639/2021 | Delta | EPI_ISL_5329366 | OK546681 |
| hCoV-19/USA/WA-S15535/2021 | Delta | EPI_ISL_8035046 | OM003855 |
| hCoV-19/USA/WA-S12638/2021 | Delta | EPI_ISL_5329377 | OK546680 |
| hCoV-19/USA/WA-S12640/2021 | Delta | EPI_ISL_5329298 | OK546682 |
| hCoV-19/USA/WA-S12635/2021 | Delta | EPI_ISL_5329176 | OK546677 |
| hCoV-19/USA/WA-S15533/2021 | Delta | EPI_ISL_8035044 | OM003853 |
| hCoV-19/USA/WA-S12646/2021 | Delta | EPI_ISL_5329302 | OK546688 |
| hCoV-19/USA/WA-S12644/2021 | Delta | EPI_ISL_5329080 | OK546686 |
| hCoV-19/USA/WA-S12642/2021 | Delta | EPI_ISL_5329181 | OK546684 |
| hCoV-19/USA/WA-S15532/2021 | Delta | EPI_ISL_8035043 | OM003852 |
| hCoV-19/USA/WA-S12641/2021 | Delta | EPI_ISL_5329079 | OK546683 |
| hCoV-19/USA/WA-S12637/2021 | Delta | EPI_ISL_5329364 | OK546679 |
| hCoV-19/USA/WA-S15540/2021 | Delta | EPI_ISL_8035051 | OM003859 |
| hCoV-19/USA/WA-S15545/2021 | Delta | EPI_ISL_8035056 | OM003864 |
| hCoV-19/USA/WA-S15551/2021 | Delta | EPI_ISL_8035062 | OM003870 |
| hCoV-19/USA/WA-S15558/2021 | Delta | EPI_ISL_8035069 | OM003876 |
| hCoV-19/USA/WA-S15556/2021 | Delta | EPI_ISL_8035067 | OM003874 |
| hCoV-19/USA/WA-S15546/2021 | Delta | EPI_ISL_8035057 | OM003865 |

|                            |       |                 |          |
|----------------------------|-------|-----------------|----------|
| hCoV-19/USA/WA-S15548/2021 | Delta | EPI_ISL_8035059 | OM003867 |
| hCoV-19/USA/WA-S15549/2021 | Delta | EPI_ISL_8035060 | OM003868 |
| hCoV-19/USA/WA-S15552/2021 | Delta | EPI_ISL_8035063 | OM003871 |
| hCoV-19/USA/WA-S15550/2021 | Delta | EPI_ISL_8035061 | OM003869 |
| hCoV-19/USA/WA-S15543/2021 | Delta | EPI_ISL_8035054 | OM003862 |
| hCoV-19/USA/WA-S15541/2021 | Delta | EPI_ISL_8035052 | OM003860 |
| hCoV-19/USA/WA-S15547/2021 | Delta | EPI_ISL_8035058 | OM003866 |
| hCoV-19/USA/WA-S15555/2021 | Delta | EPI_ISL_8035066 | OM003873 |
| hCoV-19/USA/WA-S15553/2021 | Delta | EPI_ISL_8035064 | OM003872 |
| hCoV-19/USA/WA-S15557/2021 | Delta | EPI_ISL_8035068 | OM003875 |
| hCoV-19/USA/WA-S15559/2021 | Delta | EPI_ISL_8035070 | OM003877 |
| hCoV-19/USA/WA-S15569/2021 | Delta | EPI_ISL_8035080 | OM003885 |
| hCoV-19/USA/WA-S15562/2021 | Delta | EPI_ISL_8035073 | OM003878 |
| hCoV-19/USA/WA-S15564/2021 | Delta | EPI_ISL_8035075 | OM003880 |
| hCoV-19/USA/WA-S13183/2021 | Delta | EPI_ISL_5903204 | OL333789 |
| hCoV-19/USA/WA-S15568/2021 | Delta | EPI_ISL_8035079 | OM003884 |
| hCoV-19/USA/WA-S15574/2021 | Delta | EPI_ISL_8035085 | OM003890 |
| hCoV-19/USA/WA-S15566/2021 | Delta | EPI_ISL_8035077 | OM003882 |
| hCoV-19/USA/WA-S15573/2021 | Delta | EPI_ISL_8035084 | OM003889 |
| hCoV-19/USA/WA-S15567/2021 | Delta | EPI_ISL_8035078 | OM003883 |
| hCoV-19/USA/WA-S15563/2021 | Delta | EPI_ISL_8035074 | OM003879 |
| hCoV-19/USA/WA-S15565/2021 | Delta | EPI_ISL_8035076 | OM003881 |
| hCoV-19/USA/WA-S15572/2021 | Delta | EPI_ISL_8035083 | OM003888 |
| hCoV-19/USA/WA-S15571/2021 | Delta | EPI_ISL_8035082 | OM003887 |
| hCoV-19/USA/WA-S15576/2021 | Delta | EPI_ISL_8035087 | OM003892 |
| hCoV-19/USA/WA-S15582/2021 | Delta | EPI_ISL_8035093 | OM003898 |
| hCoV-19/USA/WA-S15575/2021 | Delta | EPI_ISL_8035086 | OM003891 |
| hCoV-19/USA/WA-S15570/2021 | Delta | EPI_ISL_8035081 | OM003886 |
| hCoV-19/USA/WA-S15583/2021 | Delta | EPI_ISL_8035094 | OM003899 |
| hCoV-19/USA/WA-S15587/2021 | Delta | EPI_ISL_8035098 | OM003902 |
| hCoV-19/USA/WA-S15577/2021 | Delta | EPI_ISL_8035088 | OM003893 |
| hCoV-19/USA/WA-S15578/2021 | Delta | EPI_ISL_8035089 | OM003894 |
| hCoV-19/USA/WA-S15586/2021 | Delta | EPI_ISL_8035097 | OM003901 |
| hCoV-19/USA/WA-S15580/2021 | Delta | EPI_ISL_8035091 | OM003896 |
| hCoV-19/USA/WA-S15588/2021 | Delta | EPI_ISL_8035099 | OM003903 |
| hCoV-19/USA/WA-S15585/2021 | Delta | EPI_ISL_8035096 | OP209802 |
| hCoV-19/USA/WA-S15581/2021 | Delta | EPI_ISL_8035092 | OM003897 |
| hCoV-19/USA/WA-S15584/2021 | Delta | EPI_ISL_8035095 | OM003900 |
| hCoV-19/USA/WA-S15598/2021 | Delta | EPI_ISL_8035109 | OM003913 |
| hCoV-19/USA/WA-S15589/2021 | Delta | EPI_ISL_8035100 | OM003904 |
| hCoV-19/USA/WA-S14849/2021 | Delta | EPI_ISL_7285363 | OL740674 |
| hCoV-19/USA/WA-S15596/2021 | Delta | EPI_ISL_8035107 | OM003911 |
| hCoV-19/USA/WA-S15597/2021 | Delta | EPI_ISL_8035108 | OM003912 |
| hCoV-19/USA/WA-S15591/2021 | Delta | EPI_ISL_8035102 | OM003906 |
| hCoV-19/USA/WA-S15594/2021 | Delta | EPI_ISL_8035105 | OM003909 |
| hCoV-19/USA/WA-S15590/2021 | Delta | EPI_ISL_8035101 | OM003905 |
| hCoV-19/USA/WA-S15595/2021 | Delta | EPI_ISL_8035106 | OM003910 |
| hCoV-19/USA/WA-S15599/2021 | Delta | EPI_ISL_8035110 | OM003914 |
| hCoV-19/USA/WA-S14847/2021 | Delta | EPI_ISL_7285408 | OL740672 |
| hCoV-19/USA/WA-S14846/2021 | Delta | EPI_ISL_7285407 | OL740671 |
| hCoV-19/USA/WA-S14852/2021 | Delta | EPI_ISL_7285409 | OL740677 |

|                            |       |                 |          |
|----------------------------|-------|-----------------|----------|
| hCoV-19/USA/WA-S14853/2021 | Delta | EPI_ISL_7285337 | OL740678 |
| hCoV-19/USA/WA-S13207/2021 | Delta | EPI_ISL_5903228 | OL333793 |
| hCoV-19/USA/WA-S13206/2021 | Delta | EPI_ISL_5903227 | OL333792 |
| hCoV-19/USA/WA-S14850/2021 | Delta | EPI_ISL_7285336 | OL740675 |
| hCoV-19/USA/WA-S13205/2021 | Delta | EPI_ISL_5903226 | OL333791 |
| hCoV-19/USA/WA-S13204/2021 | Delta | EPI_ISL_5903225 | OL333790 |
| hCoV-19/USA/WA-S13217/2021 | Delta | EPI_ISL_5903238 | OL333795 |
| hCoV-19/USA/WA-S13218/2021 | Delta | EPI_ISL_5903239 | OL333796 |
| hCoV-19/USA/WA-S13219/2021 | Delta | EPI_ISL_5903240 | OL333797 |
| hCoV-19/USA/WA-S13221/2021 | Delta | EPI_ISL_5903242 | OL333798 |
| hCoV-19/USA/WA-S13222/2021 | Delta | EPI_ISL_5903243 | OL333799 |
| hCoV-19/USA/WA-S13223/2021 | Delta | EPI_ISL_5903244 | OL333800 |
| hCoV-19/USA/WA-S13228/2021 | Delta | EPI_ISL_5903249 | OP208799 |
| hCoV-19/USA/WA-S13226/2021 | Delta | EPI_ISL_5903247 | OL333803 |
| hCoV-19/USA/WA-S13225/2021 | Delta | EPI_ISL_5903246 | OL333802 |
| hCoV-19/USA/WA-S13232/2021 | Delta | EPI_ISL_5903253 | OL333804 |
| hCoV-19/USA/WA-S13233/2021 | Delta | EPI_ISL_5903254 | OL333805 |
| hCoV-19/USA/WA-S13235/2021 | Delta | EPI_ISL_5903256 | OL333807 |
| hCoV-19/USA/WA-S13236/2021 | Delta | EPI_ISL_5903257 | OL333808 |
| hCoV-19/USA/WA-S13237/2021 | Delta | EPI_ISL_5903258 | OL333809 |
| hCoV-19/USA/WA-S13243/2021 | Delta | EPI_ISL_5903264 | OL333810 |
| hCoV-19/USA/WA-S14862/2021 | Delta | EPI_ISL_7285415 | OL740679 |
| hCoV-19/USA/WA-S15051/2021 | Delta | EPI_ISL_7285343 | OL740681 |
| hCoV-19/USA/WA-S15052/2021 | Delta | EPI_ISL_7285577 | OL740682 |
| hCoV-19/USA/WA-S15050/2021 | Delta | EPI_ISL_7285393 | OL740680 |
| hCoV-19/USA/WA-S15345/2021 | Delta | EPI_ISL_7812620 | OL904009 |
| hCoV-19/USA/WA-S15054/2021 | Delta | EPI_ISL_7285353 | OL740684 |
| hCoV-19/USA/WA-S15053/2021 | Delta | EPI_ISL_7285578 | OL740683 |
| hCoV-19/USA/WA-S15187/2021 | Delta | EPI_ISL_7285679 | OL740688 |
| hCoV-19/USA/WA-S15603/2021 | Delta | EPI_ISL_8035114 | OM003916 |
| hCoV-19/USA/WA-S15647/2021 | Delta | EPI_ISL_8035156 | OM003918 |
| hCoV-19/USA/WA-S15649/2021 | Delta | EPI_ISL_8035158 | OM003919 |
| hCoV-19/USA/WA-S15646/2021 | Delta | EPI_ISL_8035155 | OM003917 |
| hCoV-19/USA/WA-S15651/2021 | Delta | EPI_ISL_8035159 | OM003920 |
| hCoV-19/USA/WA-S15652/2021 | Delta | EPI_ISL_8035160 | OM003921 |
| hCoV-19/USA/WA-S15660/2021 | Delta | EPI_ISL_8035168 | OM003925 |
| hCoV-19/USA/WA-S15659/2021 | Delta | EPI_ISL_8035167 | OM003924 |
| hCoV-19/USA/WA-S15663/2021 | Delta | EPI_ISL_8035171 | OM003928 |
| hCoV-19/USA/WA-S15662/2021 | Delta | EPI_ISL_8035170 | OM003927 |
| hCoV-19/USA/WA-S15661/2021 | Delta | EPI_ISL_8035169 | OM003926 |
| hCoV-19/USA/WA-S15681/2021 | Delta | EPI_ISL_8035189 | OM003931 |
| hCoV-19/USA/WA-S15680/2021 | Delta | EPI_ISL_8035188 | OM003930 |
| hCoV-19/USA/WA-S16159/2021 | Delta | EPI_ISL_8822478 | OM296961 |
| hCoV-19/USA/WA-S15679/2021 | Delta | EPI_ISL_8035187 | OM003929 |
| hCoV-19/USA/WA-S15712/2021 | Delta | EPI_ISL_8035218 | OM003932 |
| hCoV-19/USA/WA-S15718/2021 | Delta | EPI_ISL_8035224 | OM003934 |
| hCoV-19/USA/WA-S15717/2021 | Delta | EPI_ISL_8035223 | OM003933 |
| hCoV-19/USA/WA-S15505/2021 | Delta | EPI_ISL_7812780 | OL904016 |
| hCoV-19/USA/WA-S15766/2021 | Delta | EPI_ISL_8035269 | OM003969 |
| hCoV-19/USA/WA-S15792/2021 | Delta | EPI_ISL_8035295 | OM003988 |
| hCoV-19/USA/WA-S15929/2021 | Delta | EPI_ISL_8822243 | OM296755 |

|                            |         |                 |          |
|----------------------------|---------|-----------------|----------|
| hCoV-19/USA/WA-S15962/2021 | Delta   | EPI_ISL_8822277 | OM296772 |
| hCoV-19/USA/WA-S16001/2021 | Delta   | EPI_ISL_8822317 | OM296807 |
| hCoV-19/USA/WA-S16268/2022 | Delta   | EPI_ISL_9060325 | OM363899 |
| hCoV-19/USA/WA-S16311/2022 | Delta   | EPI_ISL_9060367 | OM363941 |
| hCoV-19/USA/WA-S16778/2022 | Delta   | EPI_ISL_9271980 | OM445424 |
| hCoV-19/USA/WA-S16674/2022 | Delta   | EPI_ISL_9271878 | OM445342 |
| hCoV-19/USA/WA-S16970/2022 | Delta   | EPI_ISL_9346790 | OM457908 |
| hCoV-19/USA/WA-S15497/2021 | Omicron | EPI_ISL_7812772 | OL904012 |
| hCoV-19/USA/WA-S15499/2021 | Omicron | EPI_ISL_7812774 | OL904013 |
| hCoV-19/USA/WA-S15504/2021 | Omicron | EPI_ISL_7812779 | OL904015 |
| hCoV-19/USA/WA-S15719/2021 | Omicron | EPI_ISL_8035225 | OM003935 |
| hCoV-19/USA/WA-S15501/2021 | Omicron | EPI_ISL_7812776 | OL904014 |
| hCoV-19/USA/WA-S15743/2021 | Omicron | EPI_ISL_8035246 | OM003951 |
| hCoV-19/USA/WA-S15723/2021 | Omicron | EPI_ISL_8035229 | OM003938 |
| hCoV-19/USA/WA-S15726/2021 | Omicron | EPI_ISL_8035231 | OM003940 |
| hCoV-19/USA/WA-S15725/2021 | Omicron | EPI_ISL_8035230 | OM003939 |
| hCoV-19/USA/WA-S15727/2021 | Omicron | EPI_ISL_8035232 | OM003941 |
| hCoV-19/USA/WA-S15721/2021 | Omicron | EPI_ISL_8035227 | OM003937 |
| hCoV-19/USA/WA-S15720/2021 | Omicron | EPI_ISL_8035226 | OM003936 |
| hCoV-19/USA/WA-S15746/2021 | Omicron | EPI_ISL_8035249 | OM003954 |
| hCoV-19/USA/WA-S15757/2021 | Omicron | EPI_ISL_8035260 | OM003961 |
| hCoV-19/USA/WA-S15759/2021 | Omicron | EPI_ISL_8035262 | OM003963 |
| hCoV-19/USA/WA-S15756/2021 | Omicron | EPI_ISL_8035259 | OM003960 |
| hCoV-19/USA/WA-S15748/2021 | Omicron | EPI_ISL_8035251 | OM003956 |
| hCoV-19/USA/WA-S15745/2021 | Omicron | EPI_ISL_8035248 | OM003953 |
| hCoV-19/USA/WA-S15755/2021 | Omicron | EPI_ISL_8035258 | OM003959 |
| hCoV-19/USA/WA-S15758/2021 | Omicron | EPI_ISL_8035261 | OM003962 |
| hCoV-19/USA/WA-S15747/2021 | Omicron | EPI_ISL_8035250 | OM003955 |
| hCoV-19/USA/WA-S15744/2021 | Omicron | EPI_ISL_8035247 | OM003952 |
| hCoV-19/USA/WA-S15749/2021 | Omicron | EPI_ISL_8035252 | OM003957 |
| hCoV-19/USA/WA-S15750/2021 | Omicron | EPI_ISL_8035253 | OM003958 |
| hCoV-19/USA/WA-S15760/2021 | Omicron | EPI_ISL_8035263 | OM003964 |
| hCoV-19/USA/WA-S15764/2021 | Omicron | EPI_ISL_8035267 | OM003967 |
| hCoV-19/USA/WA-S15765/2021 | Omicron | EPI_ISL_8035268 | OM003968 |
| hCoV-19/USA/WA-S15767/2021 | Omicron | EPI_ISL_8035270 | OM003970 |
| hCoV-19/USA/WA-S15768/2021 | Omicron | EPI_ISL_8035271 | OM003971 |
| hCoV-19/USA/WA-S15762/2021 | Omicron | EPI_ISL_8035265 | OM003966 |
| hCoV-19/USA/WA-S15769/2021 | Omicron | EPI_ISL_8035272 | OM003972 |
| hCoV-19/USA/WA-S15777/2021 | Omicron | EPI_ISL_8035280 | OM003978 |
| hCoV-19/USA/WA-S15776/2021 | Omicron | EPI_ISL_8035279 | OM003977 |
| hCoV-19/USA/WA-S15772/2021 | Omicron | EPI_ISL_8035275 | OM003973 |
| hCoV-19/USA/WA-S15778/2021 | Omicron | EPI_ISL_8035281 | OM003979 |
| hCoV-19/USA/WA-S15774/2021 | Omicron | EPI_ISL_8035277 | OM003975 |
| hCoV-19/USA/WA-S15775/2021 | Omicron | EPI_ISL_8035278 | OM003976 |
| hCoV-19/USA/WA-S15788/2021 | Omicron | EPI_ISL_8035291 | OM003984 |
| hCoV-19/USA/WA-S15787/2021 | Omicron | EPI_ISL_8035290 | OM003983 |
| hCoV-19/USA/WA-S15786/2021 | Omicron | EPI_ISL_8035289 | OM003982 |
| hCoV-19/USA/WA-S15791/2021 | Omicron | EPI_ISL_8035294 | OM003987 |
| hCoV-19/USA/WA-S15795/2021 | Omicron | EPI_ISL_8035298 | OM003991 |
| hCoV-19/USA/WA-S15793/2021 | Omicron | EPI_ISL_8035296 | OM003989 |
| hCoV-19/USA/WA-S15789/2021 | Omicron | EPI_ISL_8035292 | OM003985 |

|                            |         |                 |          |
|----------------------------|---------|-----------------|----------|
| hCoV-19/USA/WA-S15796/2021 | Omicron | EPI_ISL_8035299 | OM003992 |
| hCoV-19/USA/WA-S15790/2021 | Omicron | EPI_ISL_8035293 | OM003986 |
| hCoV-19/USA/WA-S15794/2021 | Omicron | EPI_ISL_8035297 | OM003990 |
| hCoV-19/USA/WA-S15825/2021 | Omicron | EPI_ISL_8035327 | OM003998 |
| hCoV-19/USA/WA-S15827/2021 | Omicron | EPI_ISL_8035329 | OM004000 |
| hCoV-19/USA/WA-S15824/2021 | Omicron | EPI_ISL_8035326 | OM003997 |
| hCoV-19/USA/WA-S16164/2021 | Omicron | EPI_ISL_8822483 | OM296964 |
| hCoV-19/USA/WA-S15823/2021 | Omicron | EPI_ISL_8035325 | OM003996 |
| hCoV-19/USA/WA-S16171/2021 | Omicron | EPI_ISL_8822491 | OM296967 |
| hCoV-19/USA/WA-S16169/2021 | Omicron | EPI_ISL_8822489 | OM296965 |
| hCoV-19/USA/WA-S16173/2021 | Omicron | EPI_ISL_8822493 | OM296969 |
| hCoV-19/USA/WA-S16170/2021 | Omicron | EPI_ISL_8822490 | OM296966 |
| hCoV-19/USA/WA-S16172/2021 | Omicron | EPI_ISL_8822492 | OM296968 |
| hCoV-19/USA/WA-S16177/2021 | Omicron | EPI_ISL_8822497 | OM296973 |
| hCoV-19/USA/WA-S16184/2021 | Omicron | EPI_ISL_8822504 | OM296974 |
| hCoV-19/USA/WA-S16175/2021 | Omicron | EPI_ISL_8822495 | OM296971 |
| hCoV-19/USA/WA-S16176/2021 | Omicron | EPI_ISL_8822496 | OM296972 |
| hCoV-19/USA/WA-S16174/2021 | Omicron | EPI_ISL_8822494 | OM296970 |
| hCoV-19/USA/WA-S15842/2021 | Omicron | EPI_ISL_8822154 | OM296707 |
| hCoV-19/USA/WA-S15829/2021 | Omicron | EPI_ISL_8822141 | OM296701 |
| hCoV-19/USA/WA-S15833/2021 | Omicron | EPI_ISL_8822145 | OM296705 |
| hCoV-19/USA/WA-S16186/2021 | Omicron | EPI_ISL_8822506 | OM296976 |
| hCoV-19/USA/WA-S15831/2021 | Omicron | EPI_ISL_8822143 | OM296703 |
| hCoV-19/USA/WA-S16185/2021 | Omicron | EPI_ISL_8822505 | OM296975 |
| hCoV-19/USA/WA-S16189/2021 | Omicron | EPI_ISL_8822509 | OM296979 |
| hCoV-19/USA/WA-S15828/2021 | Omicron | EPI_ISL_8822140 | OM296700 |
| hCoV-19/USA/WA-S15841/2021 | Omicron | EPI_ISL_8822153 | OM296706 |
| hCoV-19/USA/WA-S16187/2021 | Omicron | EPI_ISL_8822507 | OM296977 |
| hCoV-19/USA/WA-S15832/2021 | Omicron | EPI_ISL_8822144 | OM296704 |
| hCoV-19/USA/WA-S15830/2021 | Omicron | EPI_ISL_8822142 | OM296702 |
| hCoV-19/USA/WA-S16188/2021 | Omicron | EPI_ISL_8822508 | OM296978 |
| hCoV-19/USA/WA-S15843/2021 | Omicron | EPI_ISL_8822155 | OM296708 |
| hCoV-19/USA/WA-S15863/2021 | Omicron | EPI_ISL_8822176 | OM296720 |
| hCoV-19/USA/WA-S15864/2021 | Omicron | EPI_ISL_8822177 | OM296721 |
| hCoV-19/USA/WA-S15846/2021 | Omicron | EPI_ISL_8822158 | OM296711 |
| hCoV-19/USA/WA-S15850/2021 | Omicron | EPI_ISL_8822163 | OM296715 |
| hCoV-19/USA/WA-S15845/2021 | Omicron | EPI_ISL_8822157 | OM296710 |
| hCoV-19/USA/WA-S15847/2021 | Omicron | EPI_ISL_8822160 | OM296712 |
| hCoV-19/USA/WA-S15860/2021 | Omicron | EPI_ISL_8822173 | OM296717 |
| hCoV-19/USA/WA-S15862/2021 | Omicron | EPI_ISL_8822175 | OM296719 |
| hCoV-19/USA/WA-S15866/2021 | Omicron | EPI_ISL_8822179 | OM296723 |
| hCoV-19/USA/WA-S15865/2021 | Omicron | EPI_ISL_8822178 | OM296722 |
| hCoV-19/USA/WA-S15844/2021 | Omicron | EPI_ISL_8822156 | OM296709 |
| hCoV-19/USA/WA-S15861/2021 | Omicron | EPI_ISL_8822174 | OM296718 |
| hCoV-19/USA/WA-S15851/2021 | Omicron | EPI_ISL_8822164 | OM296716 |
| hCoV-19/USA/WA-S15848/2021 | Omicron | EPI_ISL_8822161 | OM296713 |
| hCoV-19/USA/WA-S15881/2021 | Omicron | EPI_ISL_8822195 | OM296738 |
| hCoV-19/USA/WA-S15920/2021 | Omicron | EPI_ISL_8822234 | OM296746 |
| hCoV-19/USA/WA-S15882/2021 | Omicron | EPI_ISL_8822196 | OM296739 |
| hCoV-19/USA/WA-S15872/2021 | Omicron | EPI_ISL_8822185 | OM296729 |
| hCoV-19/USA/WA-S15875/2021 | Omicron | EPI_ISL_8822188 | OM296732 |

|                            |         |                 |          |
|----------------------------|---------|-----------------|----------|
| hCoV-19/USA/WA-S15880/2021 | Omicron | EPI_ISL_8822194 | OM296737 |
| hCoV-19/USA/WA-S15867/2021 | Omicron | EPI_ISL_8822180 | OM296724 |
| hCoV-19/USA/WA-S15869/2021 | Omicron | EPI_ISL_8822182 | OM296726 |
| hCoV-19/USA/WA-S15926/2021 | Omicron | EPI_ISL_8822240 | OM296752 |
| hCoV-19/USA/WA-S15868/2021 | Omicron | EPI_ISL_8822181 | OM296725 |
| hCoV-19/USA/WA-S15878/2021 | Omicron | EPI_ISL_8822192 | OM296735 |
| hCoV-19/USA/WA-S15871/2021 | Omicron | EPI_ISL_8822184 | OM296728 |
| hCoV-19/USA/WA-S15870/2021 | Omicron | EPI_ISL_8822183 | OM296727 |
| hCoV-19/USA/WA-S15879/2021 | Omicron | EPI_ISL_8822193 | OM296736 |
| hCoV-19/USA/WA-S15873/2021 | Omicron | EPI_ISL_8822186 | OM296730 |
| hCoV-19/USA/WA-S15877/2021 | Omicron | EPI_ISL_8822190 | OM296734 |
| hCoV-19/USA/WA-S15874/2021 | Omicron | EPI_ISL_8822187 | OM296731 |
| hCoV-19/USA/WA-S15925/2021 | Omicron | EPI_ISL_8822239 | OM296751 |
| hCoV-19/USA/WA-S15966/2021 | Omicron | EPI_ISL_8822281 | OM296776 |
| hCoV-19/USA/WA-S16202/2021 | Omicron | EPI_ISL_9060259 | OM363884 |
| hCoV-19/USA/WA-S15951/2021 | Omicron | EPI_ISL_8822266 | OM296761 |
| hCoV-19/USA/WA-S15927/2021 | Omicron | EPI_ISL_8822241 | OM296753 |
| hCoV-19/USA/WA-S15960/2021 | Omicron | EPI_ISL_8822275 | OM296770 |
| hCoV-19/USA/WA-S15922/2021 | Omicron | EPI_ISL_8822236 | OM296748 |
| hCoV-19/USA/WA-S15933/2021 | Omicron | EPI_ISL_8822247 | OM296759 |
| hCoV-19/USA/WA-S15959/2021 | Omicron | EPI_ISL_8822274 | OM296769 |
| hCoV-19/USA/WA-S15923/2021 | Omicron | EPI_ISL_8822237 | OM296749 |
| hCoV-19/USA/WA-S15928/2021 | Omicron | EPI_ISL_8822242 | OM296754 |
| hCoV-19/USA/WA-S15955/2021 | Omicron | EPI_ISL_8822270 | OM296765 |
| hCoV-19/USA/WA-S15954/2021 | Omicron | EPI_ISL_8822269 | OM296764 |
| hCoV-19/USA/WA-S15934/2021 | Omicron | EPI_ISL_8822248 | OM296760 |
| hCoV-19/USA/WA-S15958/2021 | Omicron | EPI_ISL_8822273 | OM296768 |
| hCoV-19/USA/WA-S15930/2021 | Omicron | EPI_ISL_8822244 | OM296756 |
| hCoV-19/USA/WA-S15961/2021 | Omicron | EPI_ISL_8822276 | OM296771 |
| hCoV-19/USA/WA-S15956/2021 | Omicron | EPI_ISL_8822271 | OM296766 |
| hCoV-19/USA/WA-S15932/2021 | Omicron | EPI_ISL_8822246 | OM296758 |
| hCoV-19/USA/WA-S15924/2021 | Omicron | EPI_ISL_8822238 | OM296750 |
| hCoV-19/USA/WA-S15952/2021 | Omicron | EPI_ISL_8822267 | OM296762 |
| hCoV-19/USA/WA-S15953/2021 | Omicron | EPI_ISL_8822268 | OM296763 |
| hCoV-19/USA/WA-S15921/2021 | Omicron | EPI_ISL_8822235 | OM296747 |
| hCoV-19/USA/WA-S15963/2021 | Omicron | EPI_ISL_8822278 | OM296773 |
| hCoV-19/USA/WA-S15957/2021 | Omicron | EPI_ISL_8822272 | OM296767 |
| hCoV-19/USA/WA-S16203/2021 | Omicron | EPI_ISL_9060260 | OM363885 |
| hCoV-19/USA/WA-S16204/2021 | Omicron | EPI_ISL_9060261 | OM363886 |
| hCoV-19/USA/WA-S15964/2021 | Omicron | EPI_ISL_8822279 | OM296774 |
| hCoV-19/USA/WA-S15931/2021 | Omicron | EPI_ISL_8822245 | OM296757 |
| hCoV-19/USA/WA-S15965/2021 | Omicron | EPI_ISL_8822280 | OM296775 |
| hCoV-19/USA/WA-S15975/2021 | Omicron | EPI_ISL_8822290 | OM296781 |
| hCoV-19/USA/WA-S15991/2021 | Omicron | EPI_ISL_8822306 | OM296797 |
| hCoV-19/USA/WA-S16215/2021 | Omicron | EPI_ISL_9060272 | OM363887 |
| hCoV-19/USA/WA-S15993/2021 | Omicron | EPI_ISL_8822309 | OM296799 |
| hCoV-19/USA/WA-S15977/2021 | Omicron | EPI_ISL_8822292 | OM296783 |
| hCoV-19/USA/WA-S15972/2021 | Omicron | EPI_ISL_8822287 | OM296778 |
| hCoV-19/USA/WA-S15995/2021 | Omicron | EPI_ISL_8822311 | OM296801 |
| hCoV-19/USA/WA-S15997/2021 | Omicron | EPI_ISL_8822313 | OM296803 |
| hCoV-19/USA/WA-S15982/2021 | Omicron | EPI_ISL_8822297 | OM296788 |

|                            |         |                 |          |
|----------------------------|---------|-----------------|----------|
| hCoV-19/USA/WA-S15984/2021 | Omicron | EPI_ISL_8822299 | OM296790 |
| hCoV-19/USA/WA-S15989/2021 | Omicron | EPI_ISL_8822304 | OM296795 |
| hCoV-19/USA/WA-S15983/2021 | Omicron | EPI_ISL_8822298 | OM296789 |
| hCoV-19/USA/WA-S15987/2021 | Omicron | EPI_ISL_8822302 | OM296793 |
| hCoV-19/USA/WA-S16002/2021 | Omicron | EPI_ISL_8822318 | OM296808 |
| hCoV-19/USA/WA-S15998/2021 | Omicron | EPI_ISL_8822314 | OM296804 |
| hCoV-19/USA/WA-S16223/2021 | Omicron | EPI_ISL_9060280 | OM363890 |
| hCoV-19/USA/WA-S16218/2021 | Omicron | EPI_ISL_9060275 | OM363889 |
| hCoV-19/USA/WA-S16000/2021 | Omicron | EPI_ISL_8822316 | OM296806 |
| hCoV-19/USA/WA-S15996/2021 | Omicron | EPI_ISL_8822312 | OM296802 |
| hCoV-19/USA/WA-S15974/2021 | Omicron | EPI_ISL_8822289 | OM296780 |
| hCoV-19/USA/WA-S15979/2021 | Omicron | EPI_ISL_8822294 | OM296785 |
| hCoV-19/USA/WA-S15973/2021 | Omicron | EPI_ISL_8822288 | OM296779 |
| hCoV-19/USA/WA-S15990/2021 | Omicron | EPI_ISL_8822305 | OM296796 |
| hCoV-19/USA/WA-S16216/2021 | Omicron | EPI_ISL_9060273 | OM363888 |
| hCoV-19/USA/WA-S15988/2021 | Omicron | EPI_ISL_8822303 | OM296794 |
| hCoV-19/USA/WA-S16012/2021 | Omicron | EPI_ISL_8822328 | OM296818 |
| hCoV-19/USA/WA-S15978/2021 | Omicron | EPI_ISL_8822293 | OM296784 |
| hCoV-19/USA/WA-S15992/2021 | Omicron | EPI_ISL_8822307 | OM296798 |
| hCoV-19/USA/WA-S15994/2021 | Omicron | EPI_ISL_8822310 | OM296800 |
| hCoV-19/USA/WA-S15986/2021 | Omicron | EPI_ISL_8822301 | OM296792 |
| hCoV-19/USA/WA-S15971/2021 | Omicron | EPI_ISL_8822286 | OM296777 |
| hCoV-19/USA/WA-S15981/2021 | Omicron | EPI_ISL_8822296 | OM296787 |
| hCoV-19/USA/WA-S15976/2021 | Omicron | EPI_ISL_8822291 | OM296782 |
| hCoV-19/USA/WA-S15980/2021 | Omicron | EPI_ISL_8822295 | OM296786 |
| hCoV-19/USA/WA-S16018/2021 | Omicron | EPI_ISL_8822334 | OM296824 |
| hCoV-19/USA/WA-S16003/2021 | Omicron | EPI_ISL_8822319 | OM296809 |
| hCoV-19/USA/WA-S16026/2021 | Omicron | EPI_ISL_8822342 | OM296832 |
| hCoV-19/USA/WA-S16015/2021 | Omicron | EPI_ISL_8822331 | OM296821 |
| hCoV-19/USA/WA-S16009/2021 | Omicron | EPI_ISL_8822325 | OM296815 |
| hCoV-19/USA/WA-S15999/2021 | Omicron | EPI_ISL_8822315 | OM296805 |
| hCoV-19/USA/WA-S16016/2021 | Omicron | EPI_ISL_8822332 | OM296822 |
| hCoV-19/USA/WA-S16030/2021 | Omicron | EPI_ISL_8822346 | OM296836 |
| hCoV-19/USA/WA-S16021/2021 | Omicron | EPI_ISL_8822337 | OM296827 |
| hCoV-19/USA/WA-S16029/2021 | Omicron | EPI_ISL_8822345 | OM296835 |
| hCoV-19/USA/WA-S16007/2021 | Omicron | EPI_ISL_8822323 | OM296813 |
| hCoV-19/USA/WA-S16011/2021 | Omicron | EPI_ISL_8822327 | OM296817 |
| hCoV-19/USA/WA-S16005/2021 | Omicron | EPI_ISL_8822321 | OM296811 |
| hCoV-19/USA/WA-S16023/2021 | Omicron | EPI_ISL_8822339 | OM296829 |
| hCoV-19/USA/WA-S16006/2021 | Omicron | EPI_ISL_8822322 | OM296812 |
| hCoV-19/USA/WA-S16025/2021 | Omicron | EPI_ISL_8822341 | OM296831 |
| hCoV-19/USA/WA-S16004/2021 | Omicron | EPI_ISL_8822320 | OM296810 |
| hCoV-19/USA/WA-S16014/2021 | Omicron | EPI_ISL_8822330 | OM296820 |
| hCoV-19/USA/WA-S16024/2021 | Omicron | EPI_ISL_8822340 | OM296830 |
| hCoV-19/USA/WA-S16019/2021 | Omicron | EPI_ISL_8822335 | OM296825 |
| hCoV-19/USA/WA-S16008/2021 | Omicron | EPI_ISL_8822324 | OM296814 |
| hCoV-19/USA/WA-S16020/2021 | Omicron | EPI_ISL_8822336 | OM296826 |
| hCoV-19/USA/WA-S16028/2021 | Omicron | EPI_ISL_8822344 | OM296834 |
| hCoV-19/USA/WA-S16010/2021 | Omicron | EPI_ISL_8822326 | OM296816 |
| hCoV-19/USA/WA-S16022/2021 | Omicron | EPI_ISL_8822338 | OM296828 |
| hCoV-19/USA/WA-S16031/2021 | Omicron | EPI_ISL_8822347 | OM296837 |



|                            |         |                 |          |
|----------------------------|---------|-----------------|----------|
| hCoV-19/USA/WA-S16013/2021 | Omicron | EPI_ISL_8822329 | OM296819 |
| hCoV-19/USA/WA-S16027/2021 | Omicron | EPI_ISL_8822343 | OM296833 |
| hCoV-19/USA/WA-S16056/2022 | Omicron | EPI_ISL_8822373 | OM296862 |
| hCoV-19/USA/WA-S16062/2022 | Omicron | EPI_ISL_8822379 | OM296868 |
| hCoV-19/USA/WA-S16261/2022 | Omicron | EPI_ISL_9060318 | OM363892 |
| hCoV-19/USA/WA-S16054/2022 | Omicron | EPI_ISL_8822371 | OM296860 |
| hCoV-19/USA/WA-S16032/2022 | Omicron | EPI_ISL_8822348 | OM296838 |
| hCoV-19/USA/WA-S16061/2022 | Omicron | EPI_ISL_8822378 | OM296867 |
| hCoV-19/USA/WA-S16033/2022 | Omicron | EPI_ISL_8822349 | OM296839 |
| hCoV-19/USA/WA-S16049/2022 | Omicron | EPI_ISL_8822366 | OM296855 |
| hCoV-19/USA/WA-S16059/2022 | Omicron | EPI_ISL_8822376 | OM296865 |
| hCoV-19/USA/WA-S16042/2022 | Omicron | EPI_ISL_8822359 | OM296848 |
| hCoV-19/USA/WA-S16045/2022 | Omicron | EPI_ISL_8822362 | OM296851 |
| hCoV-19/USA/WA-S16043/2022 | Omicron | EPI_ISL_8822360 | OM296849 |
| hCoV-19/USA/WA-S16040/2022 | Omicron | EPI_ISL_8822357 | OM296846 |
| hCoV-19/USA/WA-S16038/2022 | Omicron | EPI_ISL_8822355 | OM296844 |
| hCoV-19/USA/WA-S16037/2022 | Omicron | EPI_ISL_8822353 | OM296843 |
| hCoV-19/USA/WA-S16053/2022 | Omicron | EPI_ISL_8822370 | OM296859 |
| hCoV-19/USA/WA-S16058/2022 | Omicron | EPI_ISL_8822375 | OM296864 |
| hCoV-19/USA/WA-S16044/2022 | Omicron | EPI_ISL_8822361 | OM296850 |
| hCoV-19/USA/WA-S16050/2022 | Omicron | EPI_ISL_8822367 | OM296856 |
| hCoV-19/USA/WA-S16052/2022 | Omicron | EPI_ISL_8822369 | OM296858 |
| hCoV-19/USA/WA-S16260/2022 | Omicron | EPI_ISL_9060317 | OM363891 |
| hCoV-19/USA/WA-S16055/2022 | Omicron | EPI_ISL_8822372 | OM296861 |
| hCoV-19/USA/WA-S16035/2022 | Omicron | EPI_ISL_8822351 | OM296841 |
| hCoV-19/USA/WA-S16041/2022 | Omicron | EPI_ISL_8822358 | OM296847 |
| hCoV-19/USA/WA-S16057/2022 | Omicron | EPI_ISL_8822374 | OM296863 |
| hCoV-19/USA/WA-S16036/2022 | Omicron | EPI_ISL_8822352 | OM296842 |
| hCoV-19/USA/WA-S16034/2022 | Omicron | EPI_ISL_8822350 | OM296840 |
| hCoV-19/USA/WA-S16039/2022 | Omicron | EPI_ISL_8822356 | OM296845 |
| hCoV-19/USA/WA-S16046/2022 | Omicron | EPI_ISL_8822363 | OM296852 |
| hCoV-19/USA/WA-S16051/2022 | Omicron | EPI_ISL_8822368 | OM296857 |
| hCoV-19/USA/WA-S16060/2022 | Omicron | EPI_ISL_8822377 | OM296866 |
| hCoV-19/USA/WA-S16047/2022 | Omicron | EPI_ISL_8822364 | OM296853 |
| hCoV-19/USA/WA-S16281/2022 | Omicron | EPI_ISL_9060338 | OM363912 |
| hCoV-19/USA/WA-S16291/2022 | Omicron | EPI_ISL_9060347 | OM363921 |
| hCoV-19/USA/WA-S16285/2022 | Omicron | EPI_ISL_9060341 | OM363915 |
| hCoV-19/USA/WA-S16275/2022 | Omicron | EPI_ISL_9060332 | OM363906 |
| hCoV-19/USA/WA-S16262/2022 | Omicron | EPI_ISL_9060319 | OM363893 |
| hCoV-19/USA/WA-S16298/2022 | Omicron | EPI_ISL_9060354 | OM363928 |
| hCoV-19/USA/WA-S16274/2022 | Omicron | EPI_ISL_9060331 | OM363905 |
| hCoV-19/USA/WA-S16273/2022 | Omicron | EPI_ISL_9060330 | OM363904 |
| hCoV-19/USA/WA-S16267/2022 | Omicron | EPI_ISL_9060324 | OM363898 |
| hCoV-19/USA/WA-S16299/2022 | Omicron | EPI_ISL_9060355 | OM363929 |
| hCoV-19/USA/WA-S16300/2022 | Omicron | EPI_ISL_9060356 | OM363930 |
| hCoV-19/USA/WA-S16286/2022 | Omicron | EPI_ISL_9060342 | OM363916 |
| hCoV-19/USA/WA-S16278/2022 | Omicron | EPI_ISL_9060335 | OM363909 |
| hCoV-19/USA/WA-S16265/2022 | Omicron | EPI_ISL_9060322 | OM363896 |
| hCoV-19/USA/WA-S16301/2022 | Omicron | EPI_ISL_9060357 | OM363931 |
| hCoV-19/USA/WA-S16306/2022 | Omicron | EPI_ISL_9060362 | OM363936 |
| hCoV-19/USA/WA-S16284/2022 | Omicron | EPI_ISL_9060340 | OM363914 |

|                            |         |                 |          |
|----------------------------|---------|-----------------|----------|
| hCoV-19/USA/WA-S16297/2022 | Omicron | EPI_ISL_9060353 | OM363927 |
| hCoV-19/USA/WA-S16296/2022 | Omicron | EPI_ISL_9060352 | OM363926 |
| hCoV-19/USA/WA-S16293/2022 | Omicron | EPI_ISL_9060349 | OM363923 |
| hCoV-19/USA/WA-S16264/2022 | Omicron | EPI_ISL_9060321 | OM363895 |
| hCoV-19/USA/WA-S16307/2022 | Omicron | EPI_ISL_9060363 | OM363937 |
| hCoV-19/USA/WA-S16290/2022 | Omicron | EPI_ISL_9060346 | OM363920 |
| hCoV-19/USA/WA-S16289/2022 | Omicron | EPI_ISL_9060345 | OM363919 |
| hCoV-19/USA/WA-S16276/2022 | Omicron | EPI_ISL_9060333 | OM363907 |
| hCoV-19/USA/WA-S16272/2022 | Omicron | EPI_ISL_9060329 | OM363903 |
| hCoV-19/USA/WA-S16294/2022 | Omicron | EPI_ISL_9060350 | OM363924 |
| hCoV-19/USA/WA-S16288/2022 | Omicron | EPI_ISL_9060344 | OM363918 |
| hCoV-19/USA/WA-S16292/2022 | Omicron | EPI_ISL_9060348 | OM363922 |
| hCoV-19/USA/WA-S16269/2022 | Omicron | EPI_ISL_9060326 | OM363900 |
| hCoV-19/USA/WA-S16287/2022 | Omicron | EPI_ISL_9060343 | OM363917 |
| hCoV-19/USA/WA-S16282/2022 | Omicron | EPI_ISL_9060339 | OM363913 |
| hCoV-19/USA/WA-S16063/2022 | Omicron | EPI_ISL_8822380 | OM296869 |
| hCoV-19/USA/WA-S16263/2022 | Omicron | EPI_ISL_9060320 | OM363894 |
| hCoV-19/USA/WA-S16304/2022 | Omicron | EPI_ISL_9060360 | OM363934 |
| hCoV-19/USA/WA-S16303/2022 | Omicron | EPI_ISL_9060359 | OM363933 |
| hCoV-19/USA/WA-S16280/2022 | Omicron | EPI_ISL_9060337 | OM363911 |
| hCoV-19/USA/WA-S16271/2022 | Omicron | EPI_ISL_9060328 | OM363902 |
| hCoV-19/USA/WA-S16277/2022 | Omicron | EPI_ISL_9060334 | OM363908 |
| hCoV-19/USA/WA-S16279/2022 | Omicron | EPI_ISL_9060336 | OM363910 |
| hCoV-19/USA/WA-S16302/2022 | Omicron | EPI_ISL_9060358 | OM363932 |
| hCoV-19/USA/WA-S16349/2022 | Omicron | EPI_ISL_9060405 | OM363979 |
| hCoV-19/USA/WA-S16416/2022 | Omicron | EPI_ISL_9060472 | OM364024 |
| hCoV-19/USA/WA-S16324/2022 | Omicron | EPI_ISL_9060380 | OM363954 |
| hCoV-19/USA/WA-S16334/2022 | Omicron | EPI_ISL_9060390 | OM363964 |
| hCoV-19/USA/WA-S16354/2022 | Omicron | EPI_ISL_9060410 | OM363984 |
| hCoV-19/USA/WA-S16325/2022 | Omicron | EPI_ISL_9060381 | OM363955 |
| hCoV-19/USA/WA-S16392/2022 | Omicron | EPI_ISL_9060448 | OM364000 |
| hCoV-19/USA/WA-S16353/2022 | Omicron | EPI_ISL_9060409 | OM363983 |
| hCoV-19/USA/WA-S16313/2022 | Omicron | EPI_ISL_9060369 | OM363943 |
| hCoV-19/USA/WA-S16319/2022 | Omicron | EPI_ISL_9060375 | OM363949 |
| hCoV-19/USA/WA-S16351/2022 | Omicron | EPI_ISL_9060407 | OM363981 |
| hCoV-19/USA/WA-S16348/2022 | Omicron | EPI_ISL_9060404 | OM363978 |
| hCoV-19/USA/WA-S16389/2022 | Omicron | EPI_ISL_9060445 | OM363997 |
| hCoV-19/USA/WA-S16341/2022 | Omicron | EPI_ISL_9060397 | OM363971 |
| hCoV-19/USA/WA-S16399/2022 | Omicron | EPI_ISL_9060455 | OM364007 |
| hCoV-19/USA/WA-S16340/2022 | Omicron | EPI_ISL_9060396 | OM363970 |
| hCoV-19/USA/WA-S16330/2022 | Omicron | EPI_ISL_9060386 | OM363960 |
| hCoV-19/USA/WA-S16317/2022 | Omicron | EPI_ISL_9060373 | OM363947 |
| hCoV-19/USA/WA-S16310/2022 | Omicron | EPI_ISL_9060366 | OM363940 |
| hCoV-19/USA/WA-S16393/2022 | Omicron | EPI_ISL_9060449 | OM364001 |
| hCoV-19/USA/WA-S16326/2022 | Omicron | EPI_ISL_9060382 | OM363956 |
| hCoV-19/USA/WA-S16350/2022 | Omicron | EPI_ISL_9060406 | OM363980 |
| hCoV-19/USA/WA-S16322/2022 | Omicron | EPI_ISL_9060378 | OM363952 |
| hCoV-19/USA/WA-S16316/2022 | Omicron | EPI_ISL_9060372 | OM363946 |
| hCoV-19/USA/WA-S16338/2022 | Omicron | EPI_ISL_9060394 | OM363968 |
| hCoV-19/USA/WA-S16397/2022 | Omicron | EPI_ISL_9060453 | OM364005 |
| hCoV-19/USA/WA-S16414/2022 | Omicron | EPI_ISL_9060470 | OM364022 |

|                            |         |                 |          |
|----------------------------|---------|-----------------|----------|
| hCoV-19/USA/WA-S16347/2022 | Omicron | EPI_ISL_9060403 | OM363977 |
| hCoV-19/USA/WA-S16345/2022 | Omicron | EPI_ISL_9060401 | OM363975 |
| hCoV-19/USA/WA-S16394/2022 | Omicron | EPI_ISL_9060450 | OM364002 |
| hCoV-19/USA/WA-S16355/2022 | Omicron | EPI_ISL_9060411 | OM363985 |
| hCoV-19/USA/WA-S16396/2022 | Omicron | EPI_ISL_9060452 | OM364004 |
| hCoV-19/USA/WA-S16329/2022 | Omicron | EPI_ISL_9060385 | OM363959 |
| hCoV-19/USA/WA-S16339/2022 | Omicron | EPI_ISL_9060395 | OM363969 |
| hCoV-19/USA/WA-S16413/2022 | Omicron | EPI_ISL_9060469 | OM364021 |
| hCoV-19/USA/WA-S16336/2022 | Omicron | EPI_ISL_9060392 | OM363966 |
| hCoV-19/USA/WA-S16343/2022 | Omicron | EPI_ISL_9060399 | OM363973 |
| hCoV-19/USA/WA-S16295/2022 | Omicron | EPI_ISL_9060351 | OM363925 |
| hCoV-19/USA/WA-S16415/2022 | Omicron | EPI_ISL_9060471 | OM364023 |
| hCoV-19/USA/WA-S16321/2022 | Omicron | EPI_ISL_9060377 | OM363951 |
| hCoV-19/USA/WA-S16390/2022 | Omicron | EPI_ISL_9060446 | OM363998 |
| hCoV-19/USA/WA-S16545/2022 | Omicron | EPI_ISL_9271749 | OM445257 |
| hCoV-19/USA/WA-S16418/2022 | Omicron | EPI_ISL_9060474 | OM364026 |
| hCoV-19/USA/WA-S16544/2022 | Omicron | EPI_ISL_9271748 | OM445256 |
| hCoV-19/USA/WA-S16305/2022 | Omicron | EPI_ISL_9060361 | OM363935 |
| hCoV-19/USA/WA-S16314/2022 | Omicron | EPI_ISL_9060370 | OM363944 |
| hCoV-19/USA/WA-S16356/2022 | Omicron | EPI_ISL_9060412 | OM363986 |
| hCoV-19/USA/WA-S16335/2022 | Omicron | EPI_ISL_9060391 | OM363965 |
| hCoV-19/USA/WA-S16381/2022 | Omicron | EPI_ISL_9060437 | OM363989 |
| hCoV-19/USA/WA-S16417/2022 | Omicron | EPI_ISL_9060473 | OM364025 |
| hCoV-19/USA/WA-S16395/2022 | Omicron | EPI_ISL_9060451 | OM364003 |
| hCoV-19/USA/WA-S16331/2022 | Omicron | EPI_ISL_9060387 | OM363961 |
| hCoV-19/USA/WA-S16332/2022 | Omicron | EPI_ISL_9060388 | OM363962 |
| hCoV-19/USA/WA-S16318/2022 | Omicron | EPI_ISL_9060374 | OM363948 |
| hCoV-19/USA/WA-S16400/2022 | Omicron | EPI_ISL_9060456 | OM364008 |
| hCoV-19/USA/WA-S16546/2022 | Omicron | EPI_ISL_9271750 | OM445258 |
| hCoV-19/USA/WA-S16344/2022 | Omicron | EPI_ISL_9060400 | OM363974 |
| hCoV-19/USA/WA-S16323/2022 | Omicron | EPI_ISL_9060379 | OM363953 |
| hCoV-19/USA/WA-S16342/2022 | Omicron | EPI_ISL_9060398 | OM363972 |
| hCoV-19/USA/WA-S16382/2022 | Omicron | EPI_ISL_9060438 | OM363990 |
| hCoV-19/USA/WA-S16346/2022 | Omicron | EPI_ISL_9060402 | OM363976 |
| hCoV-19/USA/WA-S16315/2022 | Omicron | EPI_ISL_9060371 | OM363945 |
| hCoV-19/USA/WA-S16328/2022 | Omicron | EPI_ISL_9060384 | OM363958 |
| hCoV-19/USA/WA-S16320/2022 | Omicron | EPI_ISL_9060376 | OM363950 |
| hCoV-19/USA/WA-S16337/2022 | Omicron | EPI_ISL_9060393 | OM363967 |
| hCoV-19/USA/WA-S16308/2022 | Omicron | EPI_ISL_9060364 | OM363938 |
| hCoV-19/USA/WA-S16327/2022 | Omicron | EPI_ISL_9060383 | OM363957 |
| hCoV-19/USA/WA-S16391/2022 | Omicron | EPI_ISL_9060447 | OM363999 |
| hCoV-19/USA/WA-S16606/2022 | Omicron | EPI_ISL_9271810 | OM445276 |
| hCoV-19/USA/WA-S16333/2022 | Omicron | EPI_ISL_9060389 | OM363963 |
| hCoV-19/USA/WA-S16398/2022 | Omicron | EPI_ISL_9060454 | OM364006 |
| hCoV-19/USA/WA-S16312/2022 | Omicron | EPI_ISL_9060368 | OM363942 |
| hCoV-19/USA/WA-S16309/2022 | Omicron | EPI_ISL_9060365 | OM363939 |
| hCoV-19/USA/WA-S16388/2022 | Omicron | EPI_ISL_9060444 | OM363996 |
| hCoV-19/USA/WA-S16352/2022 | Omicron | EPI_ISL_9060408 | OM363982 |
| hCoV-19/USA/WA-S16596/2022 | Omicron | EPI_ISL_9271801 | OM445267 |
| hCoV-19/USA/WA-S16562/2022 | Omicron | EPI_ISL_9271766 | OM445263 |
| hCoV-19/USA/WA-S16696/2022 | Omicron | EPI_ISL_9271899 | OM445363 |

|                            |         |                 |          |
|----------------------------|---------|-----------------|----------|
| hCoV-19/USA/WA-S16598/2022 | Omicron | EPI_ISL_9271803 | OM445269 |
| hCoV-19/USA/WA-S16567/2022 | Omicron | EPI_ISL_9271771 | OM445264 |
| hCoV-19/USA/WA-S16386/2022 | Omicron | EPI_ISL_9060442 | OM363994 |
| hCoV-19/USA/WA-S16409/2022 | Omicron | EPI_ISL_9060465 | OM364017 |
| hCoV-19/USA/WA-S16421/2022 | Omicron | EPI_ISL_9060477 | OM364029 |
| hCoV-19/USA/WA-S16407/2022 | Omicron | EPI_ISL_9060463 | OM364015 |
| hCoV-19/USA/WA-S16486/2022 | Omicron | EPI_ISL_9060542 | OM364059 |
| hCoV-19/USA/WA-S16532/2022 | Omicron | EPI_ISL_9060588 | OM364077 |
| hCoV-19/USA/WA-S16405/2022 | Omicron | EPI_ISL_9060461 | OM364013 |
| hCoV-19/USA/WA-S16692/2022 | Omicron | EPI_ISL_9271895 | OM445359 |
| hCoV-19/USA/WA-S16422/2022 | Omicron | EPI_ISL_9060478 | OM364030 |
| hCoV-19/USA/WA-S16420/2022 | Omicron | EPI_ISL_9060476 | OM364028 |
| hCoV-19/USA/WA-S16490/2022 | Omicron | EPI_ISL_9060546 | OM364063 |
| hCoV-19/USA/WA-S16387/2022 | Omicron | EPI_ISL_9060443 | OM363995 |
| hCoV-19/USA/WA-S16380/2022 | Omicron | EPI_ISL_9060436 | OM363988 |
| hCoV-19/USA/WA-S16497/2022 | Omicron | EPI_ISL_9060553 | OM364070 |
| hCoV-19/USA/WA-S16707/2022 | Omicron | EPI_ISL_9271910 | OM445373 |
| hCoV-19/USA/WA-S16491/2022 | Omicron | EPI_ISL_9060547 | OM364064 |
| hCoV-19/USA/WA-S16410/2022 | Omicron | EPI_ISL_9060466 | OM364018 |
| hCoV-19/USA/WA-S16697/2022 | Omicron | EPI_ISL_9271900 | OM445364 |
| hCoV-19/USA/WA-S16404/2022 | Omicron | EPI_ISL_9060460 | OM364012 |
| hCoV-19/USA/WA-S16423/2022 | Omicron | EPI_ISL_9060479 | OM364031 |
| hCoV-19/USA/WA-S16502/2022 | Omicron | EPI_ISL_9060558 | OM364075 |
| hCoV-19/USA/WA-S16498/2022 | Omicron | EPI_ISL_9060554 | OM364071 |
| hCoV-19/USA/WA-S16782/2022 | Omicron | EPI_ISL_9271984 | OM445428 |
| hCoV-19/USA/WA-S16419/2022 | Omicron | EPI_ISL_9060475 | OM364027 |
| hCoV-19/USA/WA-S16384/2022 | Omicron | EPI_ISL_9060440 | OM363992 |
| hCoV-19/USA/WA-S16411/2022 | Omicron | EPI_ISL_9060467 | OM364019 |
| hCoV-19/USA/WA-S16775/2022 | Omicron | EPI_ISL_9271977 | OM445421 |
| hCoV-19/USA/WA-S16704/2022 | Omicron | EPI_ISL_9271907 | OM445371 |
| hCoV-19/USA/WA-S16503/2022 | Omicron | EPI_ISL_9060559 | OM364076 |
| hCoV-19/USA/WA-S16379/2022 | Omicron | EPI_ISL_9060435 | OM363987 |
| hCoV-19/USA/WA-S16408/2022 | Omicron | EPI_ISL_9060464 | OM364016 |
| hCoV-19/USA/WA-S16485/2022 | Omicron | EPI_ISL_9060541 | OM364058 |
| hCoV-19/USA/WA-S16712/2022 | Omicron | EPI_ISL_9271915 | OM445378 |
| hCoV-19/USA/WA-S16479/2022 | Omicron | EPI_ISL_9060535 | OM364052 |
| hCoV-19/USA/WA-S16605/2022 | Omicron | EPI_ISL_9271809 | OM445275 |
| hCoV-19/USA/WA-S16401/2022 | Omicron | EPI_ISL_9060457 | OM364009 |
| hCoV-19/USA/WA-S16698/2022 | Omicron | EPI_ISL_9271901 | OM445365 |
| hCoV-19/USA/WA-S16475/2022 | Omicron | EPI_ISL_9060531 | OM364048 |
| hCoV-19/USA/WA-S16690/2022 | Omicron | EPI_ISL_9271893 | OM445357 |
| hCoV-19/USA/WA-S16599/2022 | Omicron | EPI_ISL_9271804 | OM445270 |
| hCoV-19/USA/WA-S16478/2022 | Omicron | EPI_ISL_9060534 | OM364051 |
| hCoV-19/USA/WA-S16702/2022 | Omicron | EPI_ISL_9271905 | OM445369 |
| hCoV-19/USA/WA-S16574/2022 | Omicron | EPI_ISL_9271778 | OM445265 |
| hCoV-19/USA/WA-S16493/2022 | Omicron | EPI_ISL_9060549 | OM364066 |
| hCoV-19/USA/WA-S16695/2022 | Omicron | EPI_ISL_9271898 | OM445362 |
| hCoV-19/USA/WA-S16489/2022 | Omicron | EPI_ISL_9060545 | OM364062 |
| hCoV-19/USA/WA-S16703/2022 | Omicron | EPI_ISL_9271906 | OM445370 |
| hCoV-19/USA/WA-S16383/2022 | Omicron | EPI_ISL_9060439 | OM363991 |
| hCoV-19/USA/WA-S16501/2022 | Omicron | EPI_ISL_9060557 | OM364074 |

|                            |         |                 |          |
|----------------------------|---------|-----------------|----------|
| hCoV-19/USA/WA-S16603/2022 | Omicron | EPI_ISL_9271808 | OM445274 |
| hCoV-19/USA/WA-S16402/2022 | Omicron | EPI_ISL_9060458 | OM364010 |
| hCoV-19/USA/WA-S16487/2022 | Omicron | EPI_ISL_9060543 | OM364060 |
| hCoV-19/USA/WA-S16494/2022 | Omicron | EPI_ISL_9060550 | OM364067 |
| hCoV-19/USA/WA-S16481/2022 | Omicron | EPI_ISL_9060537 | OM364054 |
| hCoV-19/USA/WA-S16480/2022 | Omicron | EPI_ISL_9060536 | OM364053 |
| hCoV-19/USA/WA-S16749/2022 | Omicron | EPI_ISL_9271952 | OM445411 |
| hCoV-19/USA/WA-S16711/2022 | Omicron | EPI_ISL_9271914 | OM445377 |
| hCoV-19/USA/WA-S16500/2022 | Omicron | EPI_ISL_9060556 | OM364073 |
| hCoV-19/USA/WA-S16495/2022 | Omicron | EPI_ISL_9060551 | OM364068 |
| hCoV-19/USA/WA-S16779/2022 | Omicron | EPI_ISL_9271981 | OM445425 |
| hCoV-19/USA/WA-S16488/2022 | Omicron | EPI_ISL_9060544 | OM364061 |
| hCoV-19/USA/WA-S16784/2022 | Omicron | EPI_ISL_9271986 | OM445430 |
| hCoV-19/USA/WA-S16700/2022 | Omicron | EPI_ISL_9271903 | OM445367 |
| hCoV-19/USA/WA-S16492/2022 | Omicron | EPI_ISL_9060548 | OM364065 |
| hCoV-19/USA/WA-S16482/2022 | Omicron | EPI_ISL_9060538 | OM364055 |
| hCoV-19/USA/WA-S16484/2022 | Omicron | EPI_ISL_9060540 | OM364057 |
| hCoV-19/USA/WA-S16483/2022 | Omicron | EPI_ISL_9060539 | OM364056 |
| hCoV-19/USA/WA-S16477/2022 | Omicron | EPI_ISL_9060533 | OM364050 |
| hCoV-19/USA/WA-S16708/2022 | Omicron | EPI_ISL_9271911 | OM445374 |
| hCoV-19/USA/WA-S16710/2022 | Omicron | EPI_ISL_9271913 | OM445376 |
| hCoV-19/USA/WA-S16737/2022 | Omicron | EPI_ISL_9271940 | OM445403 |
| hCoV-19/USA/WA-S16788/2022 | Omicron | EPI_ISL_9271990 | OM445434 |
| hCoV-19/USA/WA-S16403/2022 | Omicron | EPI_ISL_9060459 | OM364011 |
| hCoV-19/USA/WA-S16412/2022 | Omicron | EPI_ISL_9060468 | OM364020 |
| hCoV-19/USA/WA-S16706/2022 | Omicron | EPI_ISL_9271909 | OM445372 |
| hCoV-19/USA/WA-S16496/2022 | Omicron | EPI_ISL_9060552 | OM364069 |
| hCoV-19/USA/WA-S16406/2022 | Omicron | EPI_ISL_9060462 | OM364014 |
| hCoV-19/USA/WA-S16609/2022 | Omicron | EPI_ISL_9271813 | OM445279 |
| hCoV-19/USA/WA-S16533/2022 | Omicron | EPI_ISL_9060589 | OM364078 |
| hCoV-19/USA/WA-S16608/2022 | Omicron | EPI_ISL_9271812 | OM445278 |
| hCoV-19/USA/WA-S16699/2022 | Omicron | EPI_ISL_9271902 | OM445366 |
| hCoV-19/USA/WA-S16499/2022 | Omicron | EPI_ISL_9060555 | OM364072 |
| hCoV-19/USA/WA-S16701/2022 | Omicron | EPI_ISL_9271904 | OM445368 |
| hCoV-19/USA/WA-S16705/2022 | Omicron | EPI_ISL_9271908 | OP208800 |
| hCoV-19/USA/WA-S16720/2022 | Omicron | EPI_ISL_9271923 | OM445386 |
| hCoV-19/USA/WA-S16651/2022 | Omicron | EPI_ISL_9271855 | OM445321 |
| hCoV-19/USA/WA-S16709/2022 | Omicron | EPI_ISL_9271912 | OM445375 |
| hCoV-19/USA/WA-S16694/2022 | Omicron | EPI_ISL_9271897 | OM445361 |
| hCoV-19/USA/WA-S16644/2022 | Omicron | EPI_ISL_9271848 | OM445314 |
| hCoV-19/USA/WA-S16670/2022 | Omicron | EPI_ISL_9271874 | OM445338 |
| hCoV-19/USA/WA-S16666/2022 | Omicron | EPI_ISL_9271870 | OP209793 |
| hCoV-19/USA/WA-S16689/2022 | Omicron | EPI_ISL_9271892 | OM445356 |
| hCoV-19/USA/WA-S16639/2022 | Omicron | EPI_ISL_9271843 | OM445309 |
| hCoV-19/USA/WA-S16680/2022 | Omicron | EPI_ISL_9271884 | OM445348 |
| hCoV-19/USA/WA-S16731/2022 | Omicron | EPI_ISL_9271934 | OM445397 |
| hCoV-19/USA/WA-S16658/2022 | Omicron | EPI_ISL_9271862 | OM445328 |
| hCoV-19/USA/WA-S16636/2022 | Omicron | EPI_ISL_9271840 | OM445306 |
| hCoV-19/USA/WA-S16740/2022 | Omicron | EPI_ISL_9271943 | OM445406 |
| hCoV-19/USA/WA-S16652/2022 | Omicron | EPI_ISL_9271856 | OM445322 |
| hCoV-19/USA/WA-S16631/2022 | Omicron | EPI_ISL_9271835 | OM445301 |

|                            |         |                 |          |
|----------------------------|---------|-----------------|----------|
| hCoV-19/USA/WA-S16677/2022 | Omicron | EPI_ISL_9271881 | OM445345 |
| hCoV-19/USA/WA-S16723/2022 | Omicron | EPI_ISL_9271926 | OM445389 |
| hCoV-19/USA/WA-S16643/2022 | Omicron | EPI_ISL_9271847 | OM445313 |
| hCoV-19/USA/WA-S16685/2022 | Omicron | EPI_ISL_9271888 | OM445352 |
| hCoV-19/USA/WA-S16602/2022 | Omicron | EPI_ISL_9271807 | OM445273 |
| hCoV-19/USA/WA-S16714/2022 | Omicron | EPI_ISL_9271917 | OM445380 |
| hCoV-19/USA/WA-S16645/2022 | Omicron | EPI_ISL_9271849 | OM445315 |
| hCoV-19/USA/WA-S16687/2022 | Omicron | EPI_ISL_9271890 | OM445354 |
| hCoV-19/USA/WA-S16729/2022 | Omicron | EPI_ISL_9271932 | OM445395 |
| hCoV-19/USA/WA-S16726/2022 | Omicron | EPI_ISL_9271929 | OM445392 |
| hCoV-19/USA/WA-S16939/2022 | Omicron | EPI_ISL_9346759 | OM457877 |
| hCoV-19/USA/WA-S16656/2022 | Omicron | EPI_ISL_9271860 | OM445326 |
| hCoV-19/USA/WA-S16668/2022 | Omicron | EPI_ISL_9271872 | OM445336 |
| hCoV-19/USA/WA-S16647/2022 | Omicron | EPI_ISL_9271851 | OM445317 |
| hCoV-19/USA/WA-S16718/2022 | Omicron | EPI_ISL_9271921 | OM445384 |
| hCoV-19/USA/WA-S16755/2022 | Omicron | EPI_ISL_9271958 | OM445412 |
| hCoV-19/USA/WA-S16657/2022 | Omicron | EPI_ISL_9271861 | OM445327 |
| hCoV-19/USA/WA-S16713/2022 | Omicron | EPI_ISL_9271916 | OM445379 |
| hCoV-19/USA/WA-S16662/2022 | Omicron | EPI_ISL_9271866 | OM445332 |
| hCoV-19/USA/WA-S16686/2022 | Omicron | EPI_ISL_9271889 | OM445353 |
| hCoV-19/USA/WA-S16655/2022 | Omicron | EPI_ISL_9271859 | OM445325 |
| hCoV-19/USA/WA-S16722/2022 | Omicron | EPI_ISL_9271925 | OM445388 |
| hCoV-19/USA/WA-S16642/2022 | Omicron | EPI_ISL_9271846 | OM445312 |
| hCoV-19/USA/WA-S16673/2022 | Omicron | EPI_ISL_9271877 | OM445341 |
| hCoV-19/USA/WA-S16716/2022 | Omicron | EPI_ISL_9271919 | OM445382 |
| hCoV-19/USA/WA-S16691/2022 | Omicron | EPI_ISL_9271894 | OM445358 |
| hCoV-19/USA/WA-S16746/2022 | Omicron | EPI_ISL_9271949 | OM445410 |
| hCoV-19/USA/WA-S16665/2022 | Omicron | EPI_ISL_9271869 | OM445335 |
| hCoV-19/USA/WA-S16635/2022 | Omicron | EPI_ISL_9271839 | OM445305 |
| hCoV-19/USA/WA-S16735/2022 | Omicron | EPI_ISL_9271938 | OM445401 |
| hCoV-19/USA/WA-S16653/2022 | Omicron | EPI_ISL_9271857 | OM445323 |
| hCoV-19/USA/WA-S16661/2022 | Omicron | EPI_ISL_9271865 | OM445331 |
| hCoV-19/USA/WA-S16684/2022 | Omicron | EPI_ISL_9271887 | OM445351 |
| hCoV-19/USA/WA-S16734/2022 | Omicron | EPI_ISL_9271937 | OM445400 |
| hCoV-19/USA/WA-S16641/2022 | Omicron | EPI_ISL_9271845 | OM445311 |
| hCoV-19/USA/WA-S16675/2022 | Omicron | EPI_ISL_9271879 | OM445343 |
| hCoV-19/USA/WA-S16727/2022 | Omicron | EPI_ISL_9271930 | OM445393 |
| hCoV-19/USA/WA-S16630/2022 | Omicron | EPI_ISL_9271834 | OM445300 |
| hCoV-19/USA/WA-S16672/2022 | Omicron | EPI_ISL_9271876 | OM445340 |
| hCoV-19/USA/WA-S16773/2022 | Omicron | EPI_ISL_9271975 | OM445419 |
| hCoV-19/USA/WA-S16650/2022 | Omicron | EPI_ISL_9271854 | OM445320 |
| hCoV-19/USA/WA-S16724/2022 | Omicron | EPI_ISL_9271927 | OM445390 |
| hCoV-19/USA/WA-S16640/2022 | Omicron | EPI_ISL_9271844 | OM445310 |
| hCoV-19/USA/WA-S16936/2022 | Omicron | EPI_ISL_9346756 | OM457874 |
| hCoV-19/USA/WA-S16671/2022 | Omicron | EPI_ISL_9271875 | OM445339 |
| hCoV-19/USA/WA-S16638/2022 | Omicron | EPI_ISL_9271842 | OM445308 |
| hCoV-19/USA/WA-S16715/2022 | Omicron | EPI_ISL_9271918 | OM445381 |
| hCoV-19/USA/WA-S16679/2022 | Omicron | EPI_ISL_9271883 | OM445347 |
| hCoV-19/USA/WA-S16772/2022 | Omicron | EPI_ISL_9271974 | OM445418 |
| hCoV-19/USA/WA-S16771/2022 | Omicron | EPI_ISL_9271973 | OM445417 |
| hCoV-19/USA/WA-S16634/2022 | Omicron | EPI_ISL_9271838 | OM445304 |

|                            |         |                 |          |
|----------------------------|---------|-----------------|----------|
| hCoV-19/USA/WA-S16738/2022 | Omicron | EPI_ISL_9271941 | OM445404 |
| hCoV-19/USA/WA-S16693/2022 | Omicron | EPI_ISL_9271896 | OM445360 |
| hCoV-19/USA/WA-S16736/2022 | Omicron | EPI_ISL_9271939 | OM445402 |
| hCoV-19/USA/WA-S16637/2022 | Omicron | EPI_ISL_9271841 | OM445307 |
| hCoV-19/USA/WA-S16654/2022 | Omicron | EPI_ISL_9271858 | OM445324 |
| hCoV-19/USA/WA-S16676/2022 | Omicron | EPI_ISL_9271880 | OM445344 |
| hCoV-19/USA/WA-S16742/2022 | Omicron | EPI_ISL_9271945 | OM445408 |
| hCoV-19/USA/WA-S16659/2022 | Omicron | EPI_ISL_9271863 | OM445329 |
| hCoV-19/USA/WA-S16725/2022 | Omicron | EPI_ISL_9271928 | OM445391 |
| hCoV-19/USA/WA-S16646/2022 | Omicron | EPI_ISL_9271850 | OM445316 |
| hCoV-19/USA/WA-S16717/2022 | Omicron | EPI_ISL_9271920 | OM445383 |
| hCoV-19/USA/WA-S16601/2022 | Omicron | EPI_ISL_9271806 | OM445272 |
| hCoV-19/USA/WA-S16758/2022 | Omicron | EPI_ISL_9271960 | OM445413 |
| hCoV-19/USA/WA-S16789/2022 | Omicron | EPI_ISL_9271991 | OM445435 |
| hCoV-19/USA/WA-S16600/2022 | Omicron | EPI_ISL_9271805 | OM445271 |
| hCoV-19/USA/WA-S16607/2022 | Omicron | EPI_ISL_9271811 | OM445277 |
| hCoV-19/USA/WA-S16938/2022 | Omicron | EPI_ISL_9346758 | OM457876 |
| hCoV-19/USA/WA-S16935/2022 | Omicron | EPI_ISL_9346755 | OM457873 |
| hCoV-19/USA/WA-S16732/2022 | Omicron | EPI_ISL_9271935 | OM445398 |
| hCoV-19/USA/WA-S16741/2022 | Omicron | EPI_ISL_9271944 | OM445407 |
| hCoV-19/USA/WA-S16664/2022 | Omicron | EPI_ISL_9271868 | OM445334 |
| hCoV-19/USA/WA-S16719/2022 | Omicron | EPI_ISL_9271922 | OM445385 |
| hCoV-19/USA/WA-S16629/2022 | Omicron | EPI_ISL_9271833 | OM445299 |
| hCoV-19/USA/WA-S16940/2022 | Omicron | EPI_ISL_9346760 | OM457878 |
| hCoV-19/USA/WA-S16777/2022 | Omicron | EPI_ISL_9271979 | OM445423 |
| hCoV-19/USA/WA-S16632/2022 | Omicron | EPI_ISL_9271836 | OM445302 |
| hCoV-19/USA/WA-S16663/2022 | Omicron | EPI_ISL_9271867 | OM445333 |
| hCoV-19/USA/WA-S16667/2022 | Omicron | EPI_ISL_9271871 | OP209795 |
| hCoV-19/USA/WA-S16688/2022 | Omicron | EPI_ISL_9271891 | OM445355 |
| hCoV-19/USA/WA-S16678/2022 | Omicron | EPI_ISL_9271882 | OM445346 |
| hCoV-19/USA/WA-S16682/2022 | Omicron | EPI_ISL_9271885 | OM445349 |
| hCoV-19/USA/WA-S16669/2022 | Omicron | EPI_ISL_9271873 | OM445337 |
| hCoV-19/USA/WA-S16633/2022 | Omicron | EPI_ISL_9271837 | OM445303 |
| hCoV-19/USA/WA-S16739/2022 | Omicron | EPI_ISL_9271942 | OM445405 |
| hCoV-19/USA/WA-S16649/2022 | Omicron | EPI_ISL_9271853 | OM445319 |
| hCoV-19/USA/WA-S16730/2022 | Omicron | EPI_ISL_9271933 | OM445396 |
| hCoV-19/USA/WA-S16683/2022 | Omicron | EPI_ISL_9271886 | OM445350 |
| hCoV-19/USA/WA-S16660/2022 | Omicron | EPI_ISL_9271864 | OM445330 |
| hCoV-19/USA/WA-S16721/2022 | Omicron | EPI_ISL_9271924 | OM445387 |
| hCoV-19/USA/WA-S16743/2022 | Omicron | EPI_ISL_9271946 | OM445409 |
| hCoV-19/USA/WA-S16928/2022 | Omicron | EPI_ISL_9346748 | OM457866 |
| hCoV-19/USA/WA-S16929/2022 | Omicron | EPI_ISL_9346749 | OM457867 |
| hCoV-19/USA/WA-S16806/2022 | Omicron | EPI_ISL_9272008 | OM445452 |
| hCoV-19/USA/WA-S16801/2022 | Omicron | EPI_ISL_9272003 | OM445447 |
| hCoV-19/USA/WA-S16920/2022 | Omicron | EPI_ISL_9346740 | OM457858 |
| hCoV-19/USA/WA-S16805/2022 | Omicron | EPI_ISL_9272007 | OM445451 |
| hCoV-19/USA/WA-S16812/2022 | Omicron | EPI_ISL_9272014 | OM445458 |
| hCoV-19/USA/WA-S16949/2022 | Omicron | EPI_ISL_9346769 | OM457887 |
| hCoV-19/USA/WA-S16912/2022 | Omicron | EPI_ISL_9346732 | OM457850 |
| hCoV-19/USA/WA-S16921/2022 | Omicron | EPI_ISL_9346741 | OM457859 |
| hCoV-19/USA/WA-S16917/2022 | Omicron | EPI_ISL_9346737 | OM457855 |

|                            |         |                 |          |
|----------------------------|---------|-----------------|----------|
| hCoV-19/USA/WA-S16924/2022 | Omicron | EPI_ISL_9346744 | OM457862 |
| hCoV-19/USA/WA-S16889/2022 | Omicron | EPI_ISL_9346709 | OM457827 |
| hCoV-19/USA/WA-S16902/2022 | Omicron | EPI_ISL_9346722 | OM457840 |
| hCoV-19/USA/WA-S16787/2022 | Omicron | EPI_ISL_9271989 | OM445433 |
| hCoV-19/USA/WA-S16888/2022 | Omicron | EPI_ISL_9346708 | OM457826 |
| hCoV-19/USA/WA-S16927/2022 | Omicron | EPI_ISL_9346747 | OM457865 |
| hCoV-19/USA/WA-S16809/2022 | Omicron | EPI_ISL_9272011 | OM445455 |
| hCoV-19/USA/WA-S16887/2022 | Omicron | EPI_ISL_9346707 | OM457825 |
| hCoV-19/USA/WA-S16800/2022 | Omicron | EPI_ISL_9272002 | OM445446 |
| hCoV-19/USA/WA-S16794/2022 | Omicron | EPI_ISL_9271996 | OM445440 |
| hCoV-19/USA/WA-S16891/2022 | Omicron | EPI_ISL_9346711 | OM457829 |
| hCoV-19/USA/WA-S16907/2022 | Omicron | EPI_ISL_9346727 | OM457845 |
| hCoV-19/USA/WA-S16804/2022 | Omicron | EPI_ISL_9272006 | OM445450 |
| hCoV-19/USA/WA-S16796/2022 | Omicron | EPI_ISL_9271998 | OM445442 |
| hCoV-19/USA/WA-S16914/2022 | Omicron | EPI_ISL_9346734 | OM457852 |
| hCoV-19/USA/WA-S16904/2022 | Omicron | EPI_ISL_9346724 | OM457842 |
| hCoV-19/USA/WA-S16944/2022 | Omicron | EPI_ISL_9346764 | OM457882 |
| hCoV-19/USA/WA-S16910/2022 | Omicron | EPI_ISL_9346730 | OM457848 |
| hCoV-19/USA/WA-S16795/2022 | Omicron | EPI_ISL_9271997 | OM445441 |
| hCoV-19/USA/WA-S16892/2022 | Omicron | EPI_ISL_9346712 | OM457830 |
| hCoV-19/USA/WA-S16895/2022 | Omicron | EPI_ISL_9346715 | OM457833 |
| hCoV-19/USA/WA-S16819/2022 | Omicron | EPI_ISL_9272021 | OM445462 |
| hCoV-19/USA/WA-S16802/2022 | Omicron | EPI_ISL_9272004 | OM445448 |
| hCoV-19/USA/WA-S16790/2022 | Omicron | EPI_ISL_9271992 | OM445436 |
| hCoV-19/USA/WA-S16896/2022 | Omicron | EPI_ISL_9346716 | OM457834 |
| hCoV-19/USA/WA-S16786/2022 | Omicron | EPI_ISL_9271988 | OM445432 |
| hCoV-19/USA/WA-S16915/2022 | Omicron | EPI_ISL_9346735 | OM457853 |
| hCoV-19/USA/WA-S16948/2022 | Omicron | EPI_ISL_9346768 | OM457886 |
| hCoV-19/USA/WA-S16926/2022 | Omicron | EPI_ISL_9346746 | OM457864 |
| hCoV-19/USA/WA-S16781/2022 | Omicron | EPI_ISL_9271983 | OM445427 |
| hCoV-19/USA/WA-S16908/2022 | Omicron | EPI_ISL_9346728 | OM457846 |
| hCoV-19/USA/WA-S16923/2022 | Omicron | EPI_ISL_9346743 | OM457861 |
| hCoV-19/USA/WA-S16916/2022 | Omicron | EPI_ISL_9346736 | OM457854 |
| hCoV-19/USA/WA-S16922/2022 | Omicron | EPI_ISL_9346742 | OM457860 |
| hCoV-19/USA/WA-S16899/2022 | Omicron | EPI_ISL_9346719 | OM457837 |
| hCoV-19/USA/WA-S16146/2022 | Omicron | EPI_ISL_8822465 | OM296952 |
| hCoV-19/USA/WA-S16893/2022 | Omicron | EPI_ISL_9346713 | OM457831 |
| hCoV-19/USA/WA-S16815/2022 | Omicron | EPI_ISL_9272017 | OM445461 |
| hCoV-19/USA/WA-S16945/2022 | Omicron | EPI_ISL_9346765 | OM457883 |
| hCoV-19/USA/WA-S16947/2022 | Omicron | EPI_ISL_9346767 | OM457885 |
| hCoV-19/USA/WA-S16937/2022 | Omicron | EPI_ISL_9346757 | OM457875 |
| hCoV-19/USA/WA-S16943/2022 | Omicron | EPI_ISL_9346763 | OM457881 |
| hCoV-19/USA/WA-S16811/2022 | Omicron | EPI_ISL_9272013 | OM445457 |
| hCoV-19/USA/WA-S16913/2022 | Omicron | EPI_ISL_9346733 | OM457851 |
| hCoV-19/USA/WA-S16797/2022 | Omicron | EPI_ISL_9271999 | OM445443 |
| hCoV-19/USA/WA-S16903/2022 | Omicron | EPI_ISL_9346723 | OM457841 |
| hCoV-19/USA/WA-S16953/2022 | Omicron | EPI_ISL_9346773 | OM457891 |
| hCoV-19/USA/WA-S16776/2022 | Omicron | EPI_ISL_9271978 | OM445422 |
| hCoV-19/USA/WA-S16918/2022 | Omicron | EPI_ISL_9346738 | OM457856 |
| hCoV-19/USA/WA-S16909/2022 | Omicron | EPI_ISL_9346729 | OM457847 |
| hCoV-19/USA/WA-S16911/2022 | Omicron | EPI_ISL_9346731 | OM457849 |



|                            |         |                 |          |
|----------------------------|---------|-----------------|----------|
| hCoV-19/USA/WA-S16930/2022 | Omicron | EPI_ISL_9346750 | OM457868 |
| hCoV-19/USA/WA-S16932/2022 | Omicron | EPI_ISL_9346752 | OM457870 |
| hCoV-19/USA/WA-S16898/2022 | Omicron | EPI_ISL_9346718 | OM457836 |
| hCoV-19/USA/WA-S16785/2022 | Omicron | EPI_ISL_9271987 | OM445431 |
| hCoV-19/USA/WA-S16958/2022 | Omicron | EPI_ISL_9346778 | OM457896 |
| hCoV-19/USA/WA-S16793/2022 | Omicron | EPI_ISL_9271995 | OM445439 |
| hCoV-19/USA/WA-S16931/2022 | Omicron | EPI_ISL_9346751 | OM457869 |
| hCoV-19/USA/WA-S16950/2022 | Omicron | EPI_ISL_9346770 | OM457888 |
| hCoV-19/USA/WA-S16952/2022 | Omicron | EPI_ISL_9346772 | OM457890 |
| hCoV-19/USA/WA-S16897/2022 | Omicron | EPI_ISL_9346717 | OM457835 |
| hCoV-19/USA/WA-S16957/2022 | Omicron | EPI_ISL_9346777 | OM457895 |
| hCoV-19/USA/WA-S16807/2022 | Omicron | EPI_ISL_9272009 | OM445453 |
| hCoV-19/USA/WA-S16810/2022 | Omicron | EPI_ISL_9272012 | OM445456 |
| hCoV-19/USA/WA-S16813/2022 | Omicron | EPI_ISL_9272015 | OM445459 |
| hCoV-19/USA/WA-S16925/2022 | Omicron | EPI_ISL_9346745 | OM457863 |
| hCoV-19/USA/WA-S16808/2022 | Omicron | EPI_ISL_9272010 | OM445454 |
| hCoV-19/USA/WA-S16890/2022 | Omicron | EPI_ISL_9346710 | OM457828 |
| hCoV-19/USA/WA-S16799/2022 | Omicron | EPI_ISL_9272001 | OM445445 |
| hCoV-19/USA/WA-S16941/2022 | Omicron | EPI_ISL_9346761 | OM457879 |
| hCoV-19/USA/WA-S16942/2022 | Omicron | EPI_ISL_9346762 | OM457880 |
| hCoV-19/USA/WA-S16783/2022 | Omicron | EPI_ISL_9271985 | OM445429 |
| hCoV-19/USA/WA-S16774/2022 | Omicron | EPI_ISL_9271976 | OM445420 |
| hCoV-19/USA/WA-S16946/2022 | Omicron | EPI_ISL_9346766 | OM457884 |
| hCoV-19/USA/WA-S16143/2022 | Omicron | EPI_ISL_8822462 | OM296949 |
| hCoV-19/USA/WA-S16919/2022 | Omicron | EPI_ISL_9346739 | OM457857 |
| hCoV-19/USA/WA-S16798/2022 | Omicron | EPI_ISL_9272000 | OM445444 |
| hCoV-19/USA/WA-S16905/2022 | Omicron | EPI_ISL_9346725 | OM457843 |
| hCoV-19/USA/WA-S16934/2022 | Omicron | EPI_ISL_9346754 | OM457872 |
| hCoV-19/USA/WA-S16906/2022 | Omicron | EPI_ISL_9346726 | OM457844 |
| hCoV-19/USA/WA-S16954/2022 | Omicron | EPI_ISL_9346774 | OM457892 |
| hCoV-19/USA/WA-S16901/2022 | Omicron | EPI_ISL_9346721 | OM457839 |
| hCoV-19/USA/WA-S16956/2022 | Omicron | EPI_ISL_9346776 | OM457894 |
| hCoV-19/USA/WA-S16073/2022 | Omicron | EPI_ISL_8822390 | OM296879 |
| hCoV-19/USA/WA-S16122/2022 | Omicron | EPI_ISL_8822440 | OM296928 |
| hCoV-19/USA/WA-S16131/2022 | Omicron | EPI_ISL_8822450 | OM296937 |
| hCoV-19/USA/WA-S16822/2022 | Omicron | EPI_ISL_9272024 | OM445463 |
| hCoV-19/USA/WA-S16971/2022 | Omicron | EPI_ISL_9346791 | OM457909 |
| hCoV-19/USA/WA-S16107/2022 | Omicron | EPI_ISL_8822425 | OM296913 |
| hCoV-19/USA/WA-S16092/2022 | Omicron | EPI_ISL_8822410 | OM296898 |
| hCoV-19/USA/WA-S16105/2022 | Omicron | EPI_ISL_8822423 | OM296911 |
| hCoV-19/USA/WA-S16114/2022 | Omicron | EPI_ISL_8822432 | OM296920 |
| hCoV-19/USA/WA-S16951/2022 | Omicron | EPI_ISL_9346771 | OM457889 |
| hCoV-19/USA/WA-S16973/2022 | Omicron | EPI_ISL_9346793 | OM457911 |
| hCoV-19/USA/WA-S16099/2022 | Omicron | EPI_ISL_8822417 | OM296905 |
| hCoV-19/USA/WA-S16968/2022 | Omicron | EPI_ISL_9346788 | OM457906 |
| hCoV-19/USA/WA-S16963/2022 | Omicron | EPI_ISL_9346783 | OM457901 |
| hCoV-19/USA/WA-S16961/2022 | Omicron | EPI_ISL_9346781 | OM457899 |
| hCoV-19/USA/WA-S16076/2022 | Omicron | EPI_ISL_8822393 | OM296882 |
| hCoV-19/USA/WA-S16138/2022 | Omicron | EPI_ISL_8822457 | OM296944 |
| hCoV-19/USA/WA-S16972/2022 | Omicron | EPI_ISL_9346792 | OM457910 |
| hCoV-19/USA/WA-S16083/2022 | Omicron | EPI_ISL_8822400 | OM296889 |

|                            |         |                 |          |
|----------------------------|---------|-----------------|----------|
| hCoV-19/USA/WA-S16115/2022 | Omicron | EPI_ISL_8822433 | OM296921 |
| hCoV-19/USA/WA-S16069/2022 | Omicron | EPI_ISL_8822386 | OM296875 |
| hCoV-19/USA/WA-S16124/2022 | Omicron | EPI_ISL_8822442 | OM296930 |
| hCoV-19/USA/WA-S16078/2022 | Omicron | EPI_ISL_8822395 | OM296884 |
| hCoV-19/USA/WA-S16127/2022 | Omicron | EPI_ISL_8822445 | OM296933 |
| hCoV-19/USA/WA-S16098/2022 | Omicron | EPI_ISL_8822416 | OM296904 |
| hCoV-19/USA/WA-S16071/2022 | Omicron | EPI_ISL_8822388 | OM296877 |
| hCoV-19/USA/WA-S16100/2022 | Omicron | EPI_ISL_8822418 | OM296906 |
| hCoV-19/USA/WA-S16088/2022 | Omicron | EPI_ISL_8822405 | OM296894 |
| hCoV-19/USA/WA-S16960/2022 | Omicron | EPI_ISL_9346780 | OM457898 |
| hCoV-19/USA/WA-S16068/2022 | Omicron | EPI_ISL_8822385 | OM296874 |
| hCoV-19/USA/WA-S16962/2022 | Omicron | EPI_ISL_9346782 | OM457900 |
| hCoV-19/USA/WA-S16082/2022 | Omicron | EPI_ISL_8822399 | OM296888 |
| hCoV-19/USA/WA-S16964/2022 | Omicron | EPI_ISL_9346784 | OM457902 |
| hCoV-19/USA/WA-S16976/2022 | Omicron | EPI_ISL_9346796 | OM457914 |
| hCoV-19/USA/WA-S16085/2022 | Omicron | EPI_ISL_8822402 | OM296891 |
| hCoV-19/USA/WA-S16081/2022 | Omicron | EPI_ISL_8822398 | OM296887 |
| hCoV-19/USA/WA-S16975/2022 | Omicron | EPI_ISL_9346795 | OM457913 |
| hCoV-19/USA/WA-S16140/2022 | Omicron | EPI_ISL_8822459 | OM296946 |
| hCoV-19/USA/WA-S16113/2022 | Omicron | EPI_ISL_8822431 | OM296919 |
| hCoV-19/USA/WA-S16149/2022 | Omicron | EPI_ISL_8822468 | OM296955 |
| hCoV-19/USA/WA-S16104/2022 | Omicron | EPI_ISL_8822422 | OM296910 |
| hCoV-19/USA/WA-S16074/2022 | Omicron | EPI_ISL_8822391 | OM296880 |
| hCoV-19/USA/WA-S16995/2022 | Omicron | EPI_ISL_9346815 | OM457933 |
| hCoV-19/USA/WA-S16130/2022 | Omicron | EPI_ISL_8822449 | OM296936 |
| hCoV-19/USA/WA-S16102/2022 | Omicron | EPI_ISL_8822420 | OM296908 |
| hCoV-19/USA/WA-S16118/2022 | Omicron | EPI_ISL_8822436 | OM296924 |
| hCoV-19/USA/WA-S16066/2022 | Omicron | EPI_ISL_8822383 | OM296872 |
| hCoV-19/USA/WA-S16996/2022 | Omicron | EPI_ISL_9346816 | OM457934 |
| hCoV-19/USA/WA-S16095/2022 | Omicron | EPI_ISL_8822413 | OM296901 |
| hCoV-19/USA/WA-S16119/2022 | Omicron | EPI_ISL_8822437 | OM296925 |
| hCoV-19/USA/WA-S16141/2022 | Omicron | EPI_ISL_8822460 | OM296947 |
| hCoV-19/USA/WA-S16129/2022 | Omicron | EPI_ISL_8822448 | OM296935 |
| hCoV-19/USA/WA-S16955/2022 | Omicron | EPI_ISL_9346775 | OM457893 |
| hCoV-19/USA/WA-S16080/2022 | Omicron | EPI_ISL_8822397 | OM296886 |
| hCoV-19/USA/WA-S16086/2022 | Omicron | EPI_ISL_8822403 | OM296892 |
| hCoV-19/USA/WA-S16991/2022 | Omicron | EPI_ISL_9346811 | OM457929 |
| hCoV-19/USA/WA-S16101/2022 | Omicron | EPI_ISL_8822419 | OM296907 |
| hCoV-19/USA/WA-S16089/2022 | Omicron | EPI_ISL_8822406 | OM296895 |
| hCoV-19/USA/WA-S16148/2022 | Omicron | EPI_ISL_8822467 | OM296954 |
| hCoV-19/USA/WA-S16090/2022 | Omicron | EPI_ISL_8822407 | OM296896 |
| hCoV-19/USA/WA-S16064/2022 | Omicron | EPI_ISL_8822381 | OM296870 |
| hCoV-19/USA/WA-S16993/2022 | Omicron | EPI_ISL_9346813 | OM457931 |
| hCoV-19/USA/WA-S16132/2022 | Omicron | EPI_ISL_8822451 | OM296938 |
| hCoV-19/USA/WA-S16147/2022 | Omicron | EPI_ISL_8822466 | OM296953 |
| hCoV-19/USA/WA-S16992/2022 | Omicron | EPI_ISL_9346812 | OM457930 |
| hCoV-19/USA/WA-S16075/2022 | Omicron | EPI_ISL_8822392 | OM296881 |
| hCoV-19/USA/WA-S16094/2022 | Omicron | EPI_ISL_8822412 | OM296900 |
| hCoV-19/USA/WA-S16109/2022 | Omicron | EPI_ISL_8822427 | OM296915 |
| hCoV-19/USA/WA-S16096/2022 | Omicron | EPI_ISL_8822414 | OM296902 |
| hCoV-19/USA/WA-S16150/2022 | Omicron | EPI_ISL_8822469 | OM296956 |

|                            |         |                 |          |
|----------------------------|---------|-----------------|----------|
| hCoV-19/USA/WA-S16990/2022 | Omicron | EPI_ISL_9346810 | OM457928 |
| hCoV-19/USA/WA-S16091/2022 | Omicron | EPI_ISL_8822409 | OM296897 |
| hCoV-19/USA/WA-S16989/2022 | Omicron | EPI_ISL_9346809 | OM457927 |
| hCoV-19/USA/WA-S16959/2022 | Omicron | EPI_ISL_9346779 | OM457897 |
| hCoV-19/USA/WA-S16110/2022 | Omicron | EPI_ISL_8822428 | OM296916 |
| hCoV-19/USA/WA-S16065/2022 | Omicron | EPI_ISL_8822382 | OM296871 |
| hCoV-19/USA/WA-S16120/2022 | Omicron | EPI_ISL_8822438 | OM296926 |
| hCoV-19/USA/WA-S17008/2022 | Omicron | EPI_ISL_9346828 | OM457946 |
| hCoV-19/USA/WA-S16144/2022 | Omicron | EPI_ISL_8822463 | OM296950 |
| hCoV-19/USA/WA-S16103/2022 | Omicron | EPI_ISL_8822421 | OM296909 |
| hCoV-19/USA/WA-S16994/2022 | Omicron | EPI_ISL_9346814 | OM457932 |
| hCoV-19/USA/WA-S16067/2022 | Omicron | EPI_ISL_8822384 | OM296873 |
| hCoV-19/USA/WA-S16974/2022 | Omicron | EPI_ISL_9346794 | OM457912 |
| hCoV-19/USA/WA-S16135/2022 | Omicron | EPI_ISL_8822454 | OM296941 |
| hCoV-19/USA/WA-S16125/2022 | Omicron | EPI_ISL_8822443 | OM296931 |
| hCoV-19/USA/WA-S16097/2022 | Omicron | EPI_ISL_8822415 | OM296903 |
| hCoV-19/USA/WA-S16077/2022 | Omicron | EPI_ISL_8822394 | OM296883 |
| hCoV-19/USA/WA-S16072/2022 | Omicron | EPI_ISL_8822389 | OM296878 |
| hCoV-19/USA/WA-S16087/2022 | Omicron | EPI_ISL_8822404 | OM296893 |
| hCoV-19/USA/WA-S16133/2022 | Omicron | EPI_ISL_8822452 | OM296939 |
| hCoV-19/USA/WA-S16070/2022 | Omicron | EPI_ISL_8822387 | OM296876 |
| hCoV-19/USA/WA-S16111/2022 | Omicron | EPI_ISL_8822429 | OM296917 |
| hCoV-19/USA/WA-S16117/2022 | Omicron | EPI_ISL_8822435 | OM296923 |
| hCoV-19/USA/WA-S16112/2022 | Omicron | EPI_ISL_8822430 | OM296918 |
| hCoV-19/USA/WA-S16966/2022 | Omicron | EPI_ISL_9346786 | OM457904 |
| hCoV-19/USA/WA-S16128/2022 | Omicron | EPI_ISL_8822446 | OM296934 |
| hCoV-19/USA/WA-S16969/2022 | Omicron | EPI_ISL_9346789 | OM457907 |
| hCoV-19/USA/WA-S16965/2022 | Omicron | EPI_ISL_9346785 | OM457903 |
| hCoV-19/USA/WA-S16093/2022 | Omicron | EPI_ISL_8822411 | OM296899 |
| hCoV-19/USA/WA-S16079/2022 | Omicron | EPI_ISL_8822396 | OM296885 |
| hCoV-19/USA/WA-S16967/2022 | Omicron | EPI_ISL_9346787 | OM457905 |
| hCoV-19/USA/WA-S16145/2022 | Omicron | EPI_ISL_8822464 | OM296951 |
| hCoV-19/USA/WA-S16121/2022 | Omicron | EPI_ISL_8822439 | OM296927 |
| hCoV-19/USA/WA-S16108/2022 | Omicron | EPI_ISL_8822426 | OM296914 |
| hCoV-19/USA/WA-S16136/2022 | Omicron | EPI_ISL_8822455 | OM296942 |
| hCoV-19/USA/WA-S16116/2022 | Omicron | EPI_ISL_8822434 | OM296922 |
| hCoV-19/USA/WA-S16123/2022 | Omicron | EPI_ISL_8822441 | OM296929 |
| hCoV-19/USA/WA-S16978/2022 | Omicron | EPI_ISL_9346798 | OM457916 |
| hCoV-19/USA/WA-S17001/2022 | Omicron | EPI_ISL_9346821 | OM457939 |
| hCoV-19/USA/WA-S16981/2022 | Omicron | EPI_ISL_9346801 | OM457919 |
| hCoV-19/USA/WA-S17002/2022 | Omicron | EPI_ISL_9346822 | OM457940 |
| hCoV-19/USA/WA-S17007/2022 | Omicron | EPI_ISL_9346827 | OM457945 |
| hCoV-19/USA/WA-S17012/2022 | Omicron | EPI_ISL_9346832 | OM457950 |
| hCoV-19/USA/WA-S16983/2022 | Omicron | EPI_ISL_9346803 | OM457921 |
| hCoV-19/USA/WA-S16999/2022 | Omicron | EPI_ISL_9346819 | OM457937 |
| hCoV-19/USA/WA-S17000/2022 | Omicron | EPI_ISL_9346820 | OM457938 |
| hCoV-19/USA/WA-S16982/2022 | Omicron | EPI_ISL_9346802 | OM457920 |
| hCoV-19/USA/WA-S17003/2022 | Omicron | EPI_ISL_9346823 | OM457941 |
| hCoV-19/USA/WA-S16980/2022 | Omicron | EPI_ISL_9346800 | OM457918 |
| hCoV-19/USA/WA-S17011/2022 | Omicron | EPI_ISL_9346831 | OM457949 |
| hCoV-19/USA/WA-S16979/2022 | Omicron | EPI_ISL_9346799 | OM457917 |

|                            |         |                 |          |
|----------------------------|---------|-----------------|----------|
| hCoV-19/USA/WA-S16987/2022 | Omicron | EPI_ISL_9346807 | OM457925 |
| hCoV-19/USA/WA-S16977/2022 | Omicron | EPI_ISL_9346797 | OM457915 |
| hCoV-19/USA/WA-S16985/2022 | Omicron | EPI_ISL_9346805 | OM457923 |
| hCoV-19/USA/WA-S17004/2022 | Omicron | EPI_ISL_9346824 | OM457942 |
| hCoV-19/USA/WA-S17005/2022 | Omicron | EPI_ISL_9346825 | OM457943 |
| hCoV-19/USA/WA-S17009/2022 | Omicron | EPI_ISL_9346829 | OM457947 |
| hCoV-19/USA/WA-S17010/2022 | Omicron | EPI_ISL_9346830 | OM457948 |
| hCoV-19/USA/WA-S16988/2022 | Omicron | EPI_ISL_9346808 | OM457926 |
| hCoV-19/USA/WA-S16997/2022 | Omicron | EPI_ISL_9346817 | OM457935 |
| hCoV-19/USA/WA-S17006/2022 | Omicron | EPI_ISL_9346826 | OM457944 |
| hCoV-19/USA/WA-S17016/2022 | Omicron | EPI_ISL_9346837 | OM457954 |
| hCoV-19/USA/WA-S17038/2022 | Omicron | EPI_ISL_9346859 | OM457976 |
| hCoV-19/USA/WA-S17023/2022 | Omicron | EPI_ISL_9346844 | OM457961 |
| hCoV-19/USA/WA-S17042/2022 | Omicron | EPI_ISL_9346863 | OM457980 |
| hCoV-19/USA/WA-S17028/2022 | Omicron | EPI_ISL_9346849 | OM457966 |
| hCoV-19/USA/WA-S16883/2022 | Omicron | EPI_ISL_9272085 | OM445469 |
| hCoV-19/USA/WA-S17024/2022 | Omicron | EPI_ISL_9346845 | OM457962 |
| hCoV-19/USA/WA-S17026/2022 | Omicron | EPI_ISL_9346847 | OM457964 |
| hCoV-19/USA/WA-S17034/2022 | Omicron | EPI_ISL_9346855 | OM457972 |
| hCoV-19/USA/WA-S17018/2022 | Omicron | EPI_ISL_9346839 | OM457956 |
| hCoV-19/USA/WA-S17065/2022 | Omicron | EPI_ISL_9346885 | OM458002 |
| hCoV-19/USA/WA-S17022/2022 | Omicron | EPI_ISL_9346843 | OM457960 |
| hCoV-19/USA/WA-S17040/2022 | Omicron | EPI_ISL_9346861 | OM457978 |
| hCoV-19/USA/WA-S17027/2022 | Omicron | EPI_ISL_9346848 | OM457965 |
| hCoV-19/USA/WA-S17036/2022 | Omicron | EPI_ISL_9346857 | OM457974 |
| hCoV-19/USA/WA-S16884/2022 | Omicron | EPI_ISL_9272086 | OM445470 |
| hCoV-19/USA/WA-S17037/2022 | Omicron | EPI_ISL_9346858 | OM457975 |
| hCoV-19/USA/WA-S17033/2022 | Omicron | EPI_ISL_9346854 | OM457971 |
| hCoV-19/USA/WA-S17017/2022 | Omicron | EPI_ISL_9346838 | OM457955 |
| hCoV-19/USA/WA-S17021/2022 | Omicron | EPI_ISL_9346842 | OM457959 |
| hCoV-19/USA/WA-S17013/2022 | Omicron | EPI_ISL_9346833 | OM457951 |
| hCoV-19/USA/WA-S17030/2022 | Omicron | EPI_ISL_9346851 | OM457968 |
| hCoV-19/USA/WA-S17035/2022 | Omicron | EPI_ISL_9346856 | OM457973 |
| hCoV-19/USA/WA-S16151/2022 | Omicron | EPI_ISL_8822470 | OM296957 |
| hCoV-19/USA/WA-S17025/2022 | Omicron | EPI_ISL_9346846 | OM457963 |
| hCoV-19/USA/WA-S17127/2022 | Omicron | EPI_ISL_9346947 | OM458064 |
| hCoV-19/USA/WA-S16885/2022 | Omicron | EPI_ISL_9272087 | OM445471 |
| hCoV-19/USA/WA-S17039/2022 | Omicron | EPI_ISL_9346860 | OM457977 |
| hCoV-19/USA/WA-S17015/2022 | Omicron | EPI_ISL_9346836 | OM457953 |
| hCoV-19/USA/WA-S16882/2022 | Omicron | EPI_ISL_9272084 | OM445468 |
| hCoV-19/USA/WA-S17014/2022 | Omicron | EPI_ISL_9346834 | OM457952 |
| hCoV-19/USA/WA-S17029/2022 | Omicron | EPI_ISL_9346850 | OM457967 |
| hCoV-19/USA/WA-S17019/2022 | Omicron | EPI_ISL_9346840 | OM457957 |
| hCoV-19/USA/WA-S17032/2022 | Omicron | EPI_ISL_9346853 | OM457970 |
| hCoV-19/USA/WA-S17031/2022 | Omicron | EPI_ISL_9346852 | OM457969 |
| hCoV-19/USA/WA-S17063/2022 | Omicron | EPI_ISL_9346883 | OM458000 |
| hCoV-19/USA/WA-S17105/2022 | Omicron | EPI_ISL_9346925 | OM458042 |
| hCoV-19/USA/WA-S17057/2022 | Omicron | EPI_ISL_9346878 | OM457995 |
| hCoV-19/USA/WA-S17225/2022 | Omicron | EPI_ISL_9553010 | OM538446 |
| hCoV-19/USA/WA-S17135/2022 | Omicron | EPI_ISL_9346955 | OM458067 |
| hCoV-19/USA/WA-S17108/2022 | Omicron | EPI_ISL_9346928 | OM458045 |

|                            |         |                 |          |
|----------------------------|---------|-----------------|----------|
| hCoV-19/USA/WA-S17100/2022 | Omicron | EPI_ISL_9346920 | OM458037 |
| hCoV-19/USA/WA-S17125/2022 | Omicron | EPI_ISL_9346945 | OM458062 |
| hCoV-19/USA/WA-S17093/2022 | Omicron | EPI_ISL_9346913 | OM458030 |
| hCoV-19/USA/WA-S17116/2022 | Omicron | EPI_ISL_9346936 | OM458053 |
| hCoV-19/USA/WA-S17054/2022 | Omicron | EPI_ISL_9346875 | OM457992 |
| hCoV-19/USA/WA-S17224/2022 | Omicron | EPI_ISL_9553009 | OM538445 |
| hCoV-19/USA/WA-S17084/2022 | Omicron | EPI_ISL_9346904 | OM458021 |
| hCoV-19/USA/WA-S17267/2022 | Omicron | EPI_ISL_9553052 | OM538488 |
| hCoV-19/USA/WA-S17062/2022 | Omicron | EPI_ISL_9346882 | OM457999 |
| hCoV-19/USA/WA-S17218/2022 | Omicron | EPI_ISL_9553003 | OM538439 |
| hCoV-19/USA/WA-S17217/2022 | Omicron | EPI_ISL_9553002 | OM538438 |
| hCoV-19/USA/WA-S17126/2022 | Omicron | EPI_ISL_9346946 | OM458063 |
| hCoV-19/USA/WA-S17079/2022 | Omicron | EPI_ISL_9346899 | OM458016 |
| hCoV-19/USA/WA-S17083/2022 | Omicron | EPI_ISL_9346903 | OM458020 |
| hCoV-19/USA/WA-S17047/2022 | Omicron | EPI_ISL_9346868 | OM457985 |
| hCoV-19/USA/WA-S17117/2022 | Omicron | EPI_ISL_9346937 | OM458054 |
| hCoV-19/USA/WA-S17124/2022 | Omicron | EPI_ISL_9346944 | OM458061 |
| hCoV-19/USA/WA-S17101/2022 | Omicron | EPI_ISL_9346921 | OM458038 |
| hCoV-19/USA/WA-S17205/2022 | Omicron | EPI_ISL_9552990 | OM538426 |
| hCoV-19/USA/WA-S17223/2022 | Omicron | EPI_ISL_9553008 | OM538444 |
| hCoV-19/USA/WA-S17092/2022 | Omicron | EPI_ISL_9346912 | OM458029 |
| hCoV-19/USA/WA-S17060/2022 | Omicron | EPI_ISL_9346881 | OM457998 |
| hCoV-19/USA/WA-S17207/2022 | Omicron | EPI_ISL_9552992 | OM538428 |
| hCoV-19/USA/WA-S17104/2022 | Omicron | EPI_ISL_9346924 | OM458041 |
| hCoV-19/USA/WA-S17212/2022 | Omicron | EPI_ISL_9552997 | OM538433 |
| hCoV-19/USA/WA-S17086/2022 | Omicron | EPI_ISL_9346906 | OM458023 |
| hCoV-19/USA/WA-S17216/2022 | Omicron | EPI_ISL_9553001 | OM538437 |
| hCoV-19/USA/WA-S17053/2022 | Omicron | EPI_ISL_9346874 | OM457991 |
| hCoV-19/USA/WA-S17098/2022 | Omicron | EPI_ISL_9346918 | OM458035 |
| hCoV-19/USA/WA-S17081/2022 | Omicron | EPI_ISL_9346901 | OM458018 |
| hCoV-19/USA/WA-S17102/2022 | Omicron | EPI_ISL_9346922 | OM458039 |
| hCoV-19/USA/WA-S17227/2022 | Omicron | EPI_ISL_9553012 | OM538448 |
| hCoV-19/USA/WA-S17045/2022 | Omicron | EPI_ISL_9346866 | OM457983 |
| hCoV-19/USA/WA-S17051/2022 | Omicron | EPI_ISL_9346872 | OM457989 |
| hCoV-19/USA/WA-S17091/2022 | Omicron | EPI_ISL_9346911 | OM458028 |
| hCoV-19/USA/WA-S17074/2022 | Omicron | EPI_ISL_9346894 | OM458011 |
| hCoV-19/USA/WA-S17222/2022 | Omicron | EPI_ISL_9553007 | OM538443 |
| hCoV-19/USA/WA-S17066/2022 | Omicron | EPI_ISL_9346886 | OM458003 |
| hCoV-19/USA/WA-S17120/2022 | Omicron | EPI_ISL_9346940 | OM458057 |
| hCoV-19/USA/WA-S17220/2022 | Omicron | EPI_ISL_9553005 | OM538441 |
| hCoV-19/USA/WA-S17058/2022 | Omicron | EPI_ISL_9346879 | OM457996 |
| hCoV-19/USA/WA-S17231/2022 | Omicron | EPI_ISL_9553016 | OM538452 |
| hCoV-19/USA/WA-S17080/2022 | Omicron | EPI_ISL_9346900 | OM458017 |
| hCoV-19/USA/WA-S17044/2022 | Omicron | EPI_ISL_9346865 | OM457982 |
| hCoV-19/USA/WA-S17246/2022 | Omicron | EPI_ISL_9553031 | OM538467 |
| hCoV-19/USA/WA-S17273/2022 | Omicron | EPI_ISL_9553058 | OM538493 |
| hCoV-19/USA/WA-S17071/2022 | Omicron | EPI_ISL_9346891 | OM458008 |
| hCoV-19/USA/WA-S17055/2022 | Omicron | EPI_ISL_9346876 | OM457993 |
| hCoV-19/USA/WA-S17109/2022 | Omicron | EPI_ISL_9346929 | OM458046 |
| hCoV-19/USA/WA-S17134/2022 | Omicron | EPI_ISL_9346954 | OM458066 |
| hCoV-19/USA/WA-S17069/2022 | Omicron | EPI_ISL_9346889 | OM458006 |

|                            |         |                 |          |
|----------------------------|---------|-----------------|----------|
| hCoV-19/USA/WA-S17090/2022 | Omicron | EPI_ISL_9346910 | OM458027 |
| hCoV-19/USA/WA-S17210/2022 | Omicron | EPI_ISL_9552995 | OM538431 |
| hCoV-19/USA/WA-S17268/2022 | Omicron | EPI_ISL_9553053 | OM538489 |
| hCoV-19/USA/WA-S17103/2022 | Omicron | EPI_ISL_9346923 | OM458040 |
| hCoV-19/USA/WA-S17070/2022 | Omicron | EPI_ISL_9346890 | OM458007 |
| hCoV-19/USA/WA-S17050/2022 | Omicron | EPI_ISL_9346871 | OM457988 |
| hCoV-19/USA/WA-S17077/2022 | Omicron | EPI_ISL_9346897 | OM458014 |
| hCoV-19/USA/WA-S17119/2022 | Omicron | EPI_ISL_9346939 | OM458056 |
| hCoV-19/USA/WA-S17099/2022 | Omicron | EPI_ISL_9346919 | OM458036 |
| hCoV-19/USA/WA-S17088/2022 | Omicron | EPI_ISL_9346908 | OM458025 |
| hCoV-19/USA/WA-S17076/2022 | Omicron | EPI_ISL_9346896 | OM458013 |
| hCoV-19/USA/WA-S17067/2022 | Omicron | EPI_ISL_9346887 | OM458004 |
| hCoV-19/USA/WA-S17087/2022 | Omicron | EPI_ISL_9346907 | OM458024 |
| hCoV-19/USA/WA-S17214/2022 | Omicron | EPI_ISL_9552999 | OM538435 |
| hCoV-19/USA/WA-S17052/2022 | Omicron | EPI_ISL_9346873 | OM457990 |
| hCoV-19/USA/WA-S17095/2022 | Omicron | EPI_ISL_9346915 | OM458032 |
| hCoV-19/USA/WA-S17115/2022 | Omicron | EPI_ISL_9346935 | OM458052 |
| hCoV-19/USA/WA-S17121/2022 | Omicron | EPI_ISL_9346941 | OM458058 |
| hCoV-19/USA/WA-S16152/2022 | Omicron | EPI_ISL_8822471 | OM296958 |
| hCoV-19/USA/WA-S17096/2022 | Omicron | EPI_ISL_9346916 | OM458033 |
| hCoV-19/USA/WA-S17272/2022 | Omicron | EPI_ISL_9553057 | OM538492 |
| hCoV-19/USA/WA-S17221/2022 | Omicron | EPI_ISL_9553006 | OM538442 |
| hCoV-19/USA/WA-S17118/2022 | Omicron | EPI_ISL_9346938 | OM458055 |
| hCoV-19/USA/WA-S17226/2022 | Omicron | EPI_ISL_9553011 | OM538447 |
| hCoV-19/USA/WA-S17082/2022 | Omicron | EPI_ISL_9346902 | OM458019 |
| hCoV-19/USA/WA-S17073/2022 | Omicron | EPI_ISL_9346893 | OM458010 |
| hCoV-19/USA/WA-S17085/2022 | Omicron | EPI_ISL_9346905 | OM458022 |
| hCoV-19/USA/WA-S17123/2022 | Omicron | EPI_ISL_9346943 | OM458060 |
| hCoV-19/USA/WA-S17068/2022 | Omicron | EPI_ISL_9346888 | OM458005 |
| hCoV-19/USA/WA-S17049/2022 | Omicron | EPI_ISL_9346870 | OM457987 |
| hCoV-19/USA/WA-S17215/2022 | Omicron | EPI_ISL_9553000 | OM538436 |
| hCoV-19/USA/WA-S17048/2022 | Omicron | EPI_ISL_9346869 | OM457986 |
| hCoV-19/USA/WA-S17213/2022 | Omicron | EPI_ISL_9552998 | OM538434 |
| hCoV-19/USA/WA-S17271/2022 | Omicron | EPI_ISL_9553056 | OM538491 |
| hCoV-19/USA/WA-S17046/2022 | Omicron | EPI_ISL_9346867 | OM457984 |
| hCoV-19/USA/WA-S17219/2022 | Omicron | EPI_ISL_9553004 | OM538440 |
| hCoV-19/USA/WA-S17244/2022 | Omicron | EPI_ISL_9553029 | OM538465 |
| hCoV-19/USA/WA-S17206/2022 | Omicron | EPI_ISL_9552991 | OM538427 |
| hCoV-19/USA/WA-S17107/2022 | Omicron | EPI_ISL_9346927 | OM458044 |
| hCoV-19/USA/WA-S17056/2022 | Omicron | EPI_ISL_9346877 | OM457994 |
| hCoV-19/USA/WA-S17097/2022 | Omicron | EPI_ISL_9346917 | OM458034 |
| hCoV-19/USA/WA-S17325/2022 | Omicron | EPI_ISL_9553110 | OM538545 |
| hCoV-19/USA/WA-S17128/2022 | Omicron | EPI_ISL_9346948 | OM458065 |
| hCoV-19/USA/WA-S17064/2022 | Omicron | EPI_ISL_9346884 | OM458001 |
| hCoV-19/USA/WA-S16154/2022 | Omicron | EPI_ISL_8822473 | OM296959 |
| hCoV-19/USA/WA-S17209/2022 | Omicron | EPI_ISL_9552994 | OM538430 |
| hCoV-19/USA/WA-S17276/2022 | Omicron | EPI_ISL_9553061 | OM538496 |
| hCoV-19/USA/WA-S17308/2022 | Omicron | EPI_ISL_9553093 | OM538528 |
| hCoV-19/USA/WA-S17320/2022 | Omicron | EPI_ISL_9553105 | OM538540 |
| hCoV-19/USA/WA-S17287/2022 | Omicron | EPI_ISL_9553072 | OM538507 |
| hCoV-19/USA/WA-S17290/2022 | Omicron | EPI_ISL_9553075 | OM538510 |

|                            |         |                 |          |
|----------------------------|---------|-----------------|----------|
| hCoV-19/USA/WA-S17279/2022 | Omicron | EPI_ISL_9553064 | OM538499 |
| hCoV-19/USA/WA-S17286/2022 | Omicron | EPI_ISL_9553071 | OM538506 |
| hCoV-19/USA/WA-S17258/2022 | Omicron | EPI_ISL_9553043 | OM538479 |
| hCoV-19/USA/WA-S17307/2022 | Omicron | EPI_ISL_9553092 | OM538527 |
| hCoV-19/USA/WA-S17283/2022 | Omicron | EPI_ISL_9553068 | OM538503 |
| hCoV-19/USA/WA-S17302/2022 | Omicron | EPI_ISL_9553087 | OM538522 |
| hCoV-19/USA/WA-S17265/2022 | Omicron | EPI_ISL_9553050 | OM538486 |
| hCoV-19/USA/WA-S17313/2022 | Omicron | EPI_ISL_9553098 | OM538533 |
| hCoV-19/USA/WA-S17274/2022 | Omicron | EPI_ISL_9553059 | OM538494 |
| hCoV-19/USA/WA-S17316/2022 | Omicron | EPI_ISL_9553101 | OM538536 |
| hCoV-19/USA/WA-S17388/2022 | Omicron | EPI_ISL_9553173 | OM538608 |
| hCoV-19/USA/WA-S17311/2022 | Omicron | EPI_ISL_9553096 | OM538531 |
| hCoV-19/USA/WA-S17309/2022 | Omicron | EPI_ISL_9553094 | OM538529 |
| hCoV-19/USA/WA-S17322/2022 | Omicron | EPI_ISL_9553107 | OM538542 |
| hCoV-19/USA/WA-S17319/2022 | Omicron | EPI_ISL_9553104 | OM538539 |
| hCoV-19/USA/WA-S17229/2022 | Omicron | EPI_ISL_9553014 | OM538450 |
| hCoV-19/USA/WA-S17230/2022 | Omicron | EPI_ISL_9553015 | OM538451 |
| hCoV-19/USA/WA-S17263/2022 | Omicron | EPI_ISL_9553048 | OM538484 |
| hCoV-19/USA/WA-S17305/2022 | Omicron | EPI_ISL_9553090 | OM538525 |
| hCoV-19/USA/WA-S17256/2022 | Omicron | EPI_ISL_9553041 | OM538477 |
| hCoV-19/USA/WA-S17296/2022 | Omicron | EPI_ISL_9553081 | OM538516 |
| hCoV-19/USA/WA-S17252/2022 | Omicron | EPI_ISL_9553037 | OM538473 |
| hCoV-19/USA/WA-S17237/2022 | Omicron | EPI_ISL_9553022 | OM538458 |
| hCoV-19/USA/WA-S17318/2022 | Omicron | EPI_ISL_9553103 | OM538538 |
| hCoV-19/USA/WA-S17255/2022 | Omicron | EPI_ISL_9553040 | OM538476 |
| hCoV-19/USA/WA-S17238/2022 | Omicron | EPI_ISL_9553023 | OM538459 |
| hCoV-19/USA/WA-S17326/2022 | Omicron | EPI_ISL_9553111 | OM538546 |
| hCoV-19/USA/WA-S17270/2022 | Omicron | EPI_ISL_9553055 | OM538490 |
| hCoV-19/USA/WA-S17251/2022 | Omicron | EPI_ISL_9553036 | OM538472 |
| hCoV-19/USA/WA-S17288/2022 | Omicron | EPI_ISL_9553073 | OM538508 |
| hCoV-19/USA/WA-S17262/2022 | Omicron | EPI_ISL_9553047 | OM538483 |
| hCoV-19/USA/WA-S17384/2022 | Omicron | EPI_ISL_9553169 | OM538604 |
| hCoV-19/USA/WA-S17235/2022 | Omicron | EPI_ISL_9553020 | OM538456 |
| hCoV-19/USA/WA-S17249/2022 | Omicron | EPI_ISL_9553034 | OM538470 |
| hCoV-19/USA/WA-S17314/2022 | Omicron | EPI_ISL_9553099 | OM538534 |
| hCoV-19/USA/WA-S17315/2022 | Omicron | EPI_ISL_9553100 | OM538535 |
| hCoV-19/USA/WA-S17310/2022 | Omicron | EPI_ISL_9553095 | OM538530 |
| hCoV-19/USA/WA-S17261/2022 | Omicron | EPI_ISL_9553046 | OM538482 |
| hCoV-19/USA/WA-S17122/2022 | Omicron | EPI_ISL_9346942 | OM458059 |
| hCoV-19/USA/WA-S17260/2022 | Omicron | EPI_ISL_9553045 | OM538481 |
| hCoV-19/USA/WA-S17281/2022 | Omicron | EPI_ISL_9553066 | OM538501 |
| hCoV-19/USA/WA-S17253/2022 | Omicron | EPI_ISL_9553038 | OM538474 |
| hCoV-19/USA/WA-S17241/2022 | Omicron | EPI_ISL_9553026 | OM538462 |
| hCoV-19/USA/WA-S17298/2022 | Omicron | EPI_ISL_9553083 | OM538518 |
| hCoV-19/USA/WA-S17282/2022 | Omicron | EPI_ISL_9553067 | OM538502 |
| hCoV-19/USA/WA-S17243/2022 | Omicron | EPI_ISL_9553028 | OM538464 |
| hCoV-19/USA/WA-S17264/2022 | Omicron | EPI_ISL_9553049 | OM538485 |
| hCoV-19/USA/WA-S17297/2022 | Omicron | EPI_ISL_9553082 | OM538517 |
| hCoV-19/USA/WA-S17232/2022 | Omicron | EPI_ISL_9553017 | OM538453 |
| hCoV-19/USA/WA-S17383/2022 | Omicron | EPI_ISL_9553168 | OM538603 |
| hCoV-19/USA/WA-S17382/2022 | Omicron | EPI_ISL_9553167 | OM538602 |

|                            |         |                 |          |
|----------------------------|---------|-----------------|----------|
| hCoV-19/USA/WA-S17317/2022 | Omicron | EPI_ISL_9553102 | OM538537 |
| hCoV-19/USA/WA-S17236/2022 | Omicron | EPI_ISL_9553021 | OM538457 |
| hCoV-19/USA/WA-S17242/2022 | Omicron | EPI_ISL_9553027 | OM538463 |
| hCoV-19/USA/WA-S17300/2022 | Omicron | EPI_ISL_9553085 | OM538520 |
| hCoV-19/USA/WA-S17306/2022 | Omicron | EPI_ISL_9553091 | OM538526 |
| hCoV-19/USA/WA-S17284/2022 | Omicron | EPI_ISL_9553069 | OM538504 |
| hCoV-19/USA/WA-S17295/2022 | Omicron | EPI_ISL_9553080 | OM538515 |
| hCoV-19/USA/WA-S17649/2022 | Omicron | EPI_ISL_9638266 | OM571434 |
| hCoV-19/USA/WA-S17379/2022 | Omicron | EPI_ISL_9553164 | OM538599 |
| hCoV-19/USA/WA-S17390/2022 | Omicron | EPI_ISL_9553175 | OM538610 |
| hCoV-19/USA/WA-S17285/2022 | Omicron | EPI_ISL_9553070 | OM538505 |
| hCoV-19/USA/WA-S17228/2022 | Omicron | EPI_ISL_9553013 | OM538449 |
| hCoV-19/USA/WA-S17259/2022 | Omicron | EPI_ISL_9553044 | OM538480 |
| hCoV-19/USA/WA-S17339/2022 | Omicron | EPI_ISL_9553124 | OM538559 |
| hCoV-19/USA/WA-S17340/2022 | Omicron | EPI_ISL_9553125 | OM538560 |
| hCoV-19/USA/WA-S17323/2022 | Omicron | EPI_ISL_9553108 | OM538543 |
| hCoV-19/USA/WA-S17378/2022 | Omicron | EPI_ISL_9553163 | OM538598 |
| hCoV-19/USA/WA-S17240/2022 | Omicron | EPI_ISL_9553025 | OM538461 |
| hCoV-19/USA/WA-S17375/2022 | Omicron | EPI_ISL_9553160 | OM538595 |
| hCoV-19/USA/WA-S17280/2022 | Omicron | EPI_ISL_9553065 | OM538500 |
| hCoV-19/USA/WA-S17329/2022 | Omicron | EPI_ISL_9553114 | OM538549 |
| hCoV-19/USA/WA-S17304/2022 | Omicron | EPI_ISL_9553089 | OM538524 |
| hCoV-19/USA/WA-S17165/2022 | Omicron | EPI_ISL_9346986 | OM458077 |
| hCoV-19/USA/WA-S17376/2022 | Omicron | EPI_ISL_9553161 | OM538596 |
| hCoV-19/USA/WA-S17278/2022 | Omicron | EPI_ISL_9553063 | OM538498 |
| hCoV-19/USA/WA-S17389/2022 | Omicron | EPI_ISL_9553174 | OM538609 |
| hCoV-19/USA/WA-S17171/2022 | Omicron | EPI_ISL_9346992 | OM458078 |
| hCoV-19/USA/WA-S17277/2022 | Omicron | EPI_ISL_9553062 | OM538497 |
| hCoV-19/USA/WA-S17275/2022 | Omicron | EPI_ISL_9553060 | OM538495 |
| hCoV-19/USA/WA-S17294/2022 | Omicron | EPI_ISL_9553079 | OM538514 |
| hCoV-19/USA/WA-S17269/2022 | Omicron | EPI_ISL_9553054 | OP209794 |
| hCoV-19/USA/WA-S17254/2022 | Omicron | EPI_ISL_9553039 | OM538475 |
| hCoV-19/USA/WA-S17233/2022 | Omicron | EPI_ISL_9553018 | OM538454 |
| hCoV-19/USA/WA-S17394/2022 | Omicron | EPI_ISL_9553179 | OM538614 |
| hCoV-19/USA/WA-S17303/2022 | Omicron | EPI_ISL_9553088 | OM538523 |
| hCoV-19/USA/WA-S17332/2022 | Omicron | EPI_ISL_9553117 | OM538552 |
| hCoV-19/USA/WA-S17331/2022 | Omicron | EPI_ISL_9553116 | OM538551 |
| hCoV-19/USA/WA-S17385/2022 | Omicron | EPI_ISL_9553170 | OM538605 |
| hCoV-19/USA/WA-S17377/2022 | Omicron | EPI_ISL_9553162 | OM538597 |
| hCoV-19/USA/WA-S17257/2022 | Omicron | EPI_ISL_9553042 | OM538478 |
| hCoV-19/USA/WA-S17239/2022 | Omicron | EPI_ISL_9553024 | OM538460 |
| hCoV-19/USA/WA-S17381/2022 | Omicron | EPI_ISL_9553166 | OM538601 |
| hCoV-19/USA/WA-S17234/2022 | Omicron | EPI_ISL_9553019 | OM538455 |
| hCoV-19/USA/WA-S17374/2022 | Omicron | EPI_ISL_9553159 | OM538594 |
| hCoV-19/USA/WA-S17380/2022 | Omicron | EPI_ISL_9553165 | OM538600 |
| hCoV-19/USA/WA-S17291/2022 | Omicron | EPI_ISL_9553076 | OM538511 |
| hCoV-19/USA/WA-S17301/2022 | Omicron | EPI_ISL_9553086 | OM538521 |
| hCoV-19/USA/WA-S17321/2022 | Omicron | EPI_ISL_9553106 | OM538541 |
| hCoV-19/USA/WA-S17312/2022 | Omicron | EPI_ISL_9553097 | OM538532 |
| hCoV-19/USA/WA-S17386/2022 | Omicron | EPI_ISL_9553171 | OM538606 |
| hCoV-19/USA/WA-S17387/2022 | Omicron | EPI_ISL_9553172 | OM538607 |



|                            |         |                 |          |
|----------------------------|---------|-----------------|----------|
| hCoV-19/USA/WA-S17430/2022 | Omicron | EPI_ISL_9553213 | OM538648 |
| hCoV-19/USA/WA-S17403/2022 | Omicron | EPI_ISL_9553188 | OM538623 |
| hCoV-19/USA/WA-S17351/2022 | Omicron | EPI_ISL_9553136 | OM538571 |
| hCoV-19/USA/WA-S17367/2022 | Omicron | EPI_ISL_9553152 | OM538587 |
| hCoV-19/USA/WA-S17398/2022 | Omicron | EPI_ISL_9553183 | OM538618 |
| hCoV-19/USA/WA-S17425/2022 | Omicron | EPI_ISL_9553208 | OM538643 |
| hCoV-19/USA/WA-S17431/2022 | Omicron | EPI_ISL_9553214 | OM538649 |
| hCoV-19/USA/WA-S17350/2022 | Omicron | EPI_ISL_9553135 | OM538570 |
| hCoV-19/USA/WA-S17568/2022 | Omicron | EPI_ISL_9638186 | OM571354 |
| hCoV-19/USA/WA-S17373/2022 | Omicron | EPI_ISL_9553158 | OM538593 |
| hCoV-19/USA/WA-S17391/2022 | Omicron | EPI_ISL_9553176 | OM538611 |
| hCoV-19/USA/WA-S17413/2022 | Omicron | EPI_ISL_9553197 | OM538632 |
| hCoV-19/USA/WA-S17328/2022 | Omicron | EPI_ISL_9553113 | OM538548 |
| hCoV-19/USA/WA-S17406/2022 | Omicron | EPI_ISL_9553190 | OM538625 |
| hCoV-19/USA/WA-S17422/2022 | Omicron | EPI_ISL_9553206 | OM538641 |
| hCoV-19/USA/WA-S17372/2022 | Omicron | EPI_ISL_9553157 | OM538592 |
| hCoV-19/USA/WA-S17371/2022 | Omicron | EPI_ISL_9553156 | OM538591 |
| hCoV-19/USA/WA-S17361/2022 | Omicron | EPI_ISL_9553146 | OM538581 |
| hCoV-19/USA/WA-S17342/2022 | Omicron | EPI_ISL_9553127 | OM538562 |
| hCoV-19/USA/WA-S17410/2022 | Omicron | EPI_ISL_9553194 | OM538629 |
| hCoV-19/USA/WA-S17359/2022 | Omicron | EPI_ISL_9553144 | OM538579 |
| hCoV-19/USA/WA-S17338/2022 | Omicron | EPI_ISL_9553123 | OM538558 |
| hCoV-19/USA/WA-S17408/2022 | Omicron | EPI_ISL_9553192 | OM538627 |
| hCoV-19/USA/WA-S17421/2022 | Omicron | EPI_ISL_9553205 | OM538640 |
| hCoV-19/USA/WA-S17566/2022 | Omicron | EPI_ISL_9638184 | OM571352 |
| hCoV-19/USA/WA-S17401/2022 | Omicron | EPI_ISL_9553186 | OM538621 |
| hCoV-19/USA/WA-S17435/2022 | Omicron | EPI_ISL_9553218 | OM538653 |
| hCoV-19/USA/WA-S17333/2022 | Omicron | EPI_ISL_9553118 | OM538553 |
| hCoV-19/USA/WA-S17365/2022 | Omicron | EPI_ISL_9553150 | OM538585 |
| hCoV-19/USA/WA-S17567/2022 | Omicron | EPI_ISL_9638185 | OM571353 |
| hCoV-19/USA/WA-S17412/2022 | Omicron | EPI_ISL_9553196 | OM538631 |
| hCoV-19/USA/WA-S17392/2022 | Omicron | EPI_ISL_9553177 | OM538612 |
| hCoV-19/USA/WA-S17432/2022 | Omicron | EPI_ISL_9553215 | OM538650 |
| hCoV-19/USA/WA-S17405/2022 | Omicron | EPI_ISL_9553189 | OM538624 |
| hCoV-19/USA/WA-S17354/2022 | Omicron | EPI_ISL_9553139 | OM538574 |
| hCoV-19/USA/WA-S17362/2022 | Omicron | EPI_ISL_9553147 | OM538582 |
| hCoV-19/USA/WA-S17416/2022 | Omicron | EPI_ISL_9553200 | OM538635 |
| hCoV-19/USA/WA-S17399/2022 | Omicron | EPI_ISL_9553184 | OM538619 |
| hCoV-19/USA/WA-S17174/2022 | Omicron | EPI_ISL_9346995 | OM458079 |
| hCoV-19/USA/WA-S17352/2022 | Omicron | EPI_ISL_9553137 | OM538572 |
| hCoV-19/USA/WA-S17330/2022 | Omicron | EPI_ISL_9553115 | OM538550 |
| hCoV-19/USA/WA-S17433/2022 | Omicron | EPI_ISL_9553216 | OM538651 |
| hCoV-19/USA/WA-S17427/2022 | Omicron | EPI_ISL_9553210 | OM538645 |
| hCoV-19/USA/WA-S17341/2022 | Omicron | EPI_ISL_9553126 | OM538561 |
| hCoV-19/USA/WA-S17400/2022 | Omicron | EPI_ISL_9553185 | OM538620 |
| hCoV-19/USA/WA-S17549/2022 | Omicron | EPI_ISL_9638167 | OM571335 |
| hCoV-19/USA/WA-S17569/2022 | Omicron | EPI_ISL_9638187 | OM571355 |
| hCoV-19/USA/WA-S17553/2022 | Omicron | EPI_ISL_9638171 | OM571339 |
| hCoV-19/USA/WA-S17417/2022 | Omicron | EPI_ISL_9553201 | OM538636 |
| hCoV-19/USA/WA-S17368/2022 | Omicron | EPI_ISL_9553153 | OM538588 |
| hCoV-19/USA/WA-S17419/2022 | Omicron | EPI_ISL_9553203 | OM538638 |

|                            |         |                 |          |
|----------------------------|---------|-----------------|----------|
| hCoV-19/USA/WA-S17334/2022 | Omicron | EPI_ISL_9553119 | OM538554 |
| hCoV-19/USA/WA-S17434/2022 | Omicron | EPI_ISL_9553217 | OM538652 |
| hCoV-19/USA/WA-S17370/2022 | Omicron | EPI_ISL_9553155 | OM538590 |
| hCoV-19/USA/WA-S17353/2022 | Omicron | EPI_ISL_9553138 | OM538573 |
| hCoV-19/USA/WA-S17544/2022 | Omicron | EPI_ISL_9638162 | OM571330 |
| hCoV-19/USA/WA-S17355/2022 | Omicron | EPI_ISL_9553140 | OM538575 |
| hCoV-19/USA/WA-S17428/2022 | Omicron | EPI_ISL_9553211 | OM538646 |
| hCoV-19/USA/WA-S17356/2022 | Omicron | EPI_ISL_9553141 | OM538576 |
| hCoV-19/USA/WA-S17347/2022 | Omicron | EPI_ISL_9553132 | OM538567 |
| hCoV-19/USA/WA-S17327/2022 | Omicron | EPI_ISL_9553112 | OM538547 |
| hCoV-19/USA/WA-S17564/2022 | Omicron | EPI_ISL_9638182 | OM571350 |
| hCoV-19/USA/WA-S17348/2022 | Omicron | EPI_ISL_9553133 | OM538568 |
| hCoV-19/USA/WA-S17409/2022 | Omicron | EPI_ISL_9553193 | OM538628 |
| hCoV-19/USA/WA-S17364/2022 | Omicron | EPI_ISL_9553149 | OM538584 |
| hCoV-19/USA/WA-S17565/2022 | Omicron | EPI_ISL_9638183 | OM571351 |
| hCoV-19/USA/WA-S17415/2022 | Omicron | EPI_ISL_9553199 | OM538634 |
| hCoV-19/USA/WA-S17358/2022 | Omicron | EPI_ISL_9553143 | OM538578 |
| hCoV-19/USA/WA-S17426/2022 | Omicron | EPI_ISL_9553209 | OM538644 |
| hCoV-19/USA/WA-S17420/2022 | Omicron | EPI_ISL_9553204 | OM538639 |
| hCoV-19/USA/WA-S17550/2022 | Omicron | EPI_ISL_9638168 | OM571336 |
| hCoV-19/USA/WA-S17414/2022 | Omicron | EPI_ISL_9553198 | OM538633 |
| hCoV-19/USA/WA-S17570/2022 | Omicron | EPI_ISL_9638188 | OM571356 |
| hCoV-19/USA/WA-S17366/2022 | Omicron | EPI_ISL_9553151 | OM538586 |
| hCoV-19/USA/WA-S17411/2022 | Omicron | EPI_ISL_9553195 | OM538630 |
| hCoV-19/USA/WA-S17436/2022 | Omicron | EPI_ISL_9553219 | OM538654 |
| hCoV-19/USA/WA-S17418/2022 | Omicron | EPI_ISL_9553202 | OM538637 |
| hCoV-19/USA/WA-S17397/2022 | Omicron | EPI_ISL_9553182 | OM538617 |
| hCoV-19/USA/WA-S17336/2022 | Omicron | EPI_ISL_9553121 | OM538556 |
| hCoV-19/USA/WA-S17552/2022 | Omicron | EPI_ISL_9638170 | OM571338 |
| hCoV-19/USA/WA-S17335/2022 | Omicron | EPI_ISL_9553120 | OM538555 |
| hCoV-19/USA/WA-S17360/2022 | Omicron | EPI_ISL_9553145 | OM538580 |
| hCoV-19/USA/WA-S17402/2022 | Omicron | EPI_ISL_9553187 | OM538622 |
| hCoV-19/USA/WA-S17369/2022 | Omicron | EPI_ISL_9553154 | OM538589 |
| hCoV-19/USA/WA-S17343/2022 | Omicron | EPI_ISL_9553128 | OM538563 |
| hCoV-19/USA/WA-S17337/2022 | Omicron | EPI_ISL_9553122 | OM538557 |
| hCoV-19/USA/WA-S17548/2022 | Omicron | EPI_ISL_9638166 | OM571334 |
| hCoV-19/USA/WA-S17344/2022 | Omicron | EPI_ISL_9553129 | OM538564 |
| hCoV-19/USA/WA-S17396/2022 | Omicron | EPI_ISL_9553181 | OM538616 |
| hCoV-19/USA/WA-S17407/2022 | Omicron | EPI_ISL_9553191 | OM538626 |
| hCoV-19/USA/WA-S17625/2022 | Omicron | EPI_ISL_9638242 | OM571410 |
| hCoV-19/USA/WA-S17546/2022 | Omicron | EPI_ISL_9638164 | OM571332 |
| hCoV-19/USA/WA-S17429/2022 | Omicron | EPI_ISL_9553212 | OM538647 |
| hCoV-19/USA/WA-S17604/2022 | Omicron | EPI_ISL_9638221 | OM571389 |
| hCoV-19/USA/WA-S17598/2022 | Omicron | EPI_ISL_9638215 | OM571383 |
| hCoV-19/USA/WA-S17639/2022 | Omicron | EPI_ISL_9638256 | OM571424 |
| hCoV-19/USA/WA-S17542/2022 | Omicron | EPI_ISL_9638160 | OM571328 |
| hCoV-19/USA/WA-S17578/2022 | Omicron | EPI_ISL_9638196 | OM571364 |
| hCoV-19/USA/WA-S17587/2022 | Omicron | EPI_ISL_9638205 | OM571373 |
| hCoV-19/USA/WA-S17543/2022 | Omicron | EPI_ISL_9638161 | OM571329 |
| hCoV-19/USA/WA-S17581/2022 | Omicron | EPI_ISL_9638199 | OM571367 |
| hCoV-19/USA/WA-S17572/2022 | Omicron | EPI_ISL_9638190 | OM571358 |

|                            |         |                 |          |
|----------------------------|---------|-----------------|----------|
| hCoV-19/USA/WA-S17575/2022 | Omicron | EPI_ISL_9638193 | OM571361 |
| hCoV-19/USA/WA-S17437/2022 | Omicron | EPI_ISL_9553220 | OM538655 |
| hCoV-19/USA/WA-S17545/2022 | Omicron | EPI_ISL_9638163 | OM571331 |
| hCoV-19/USA/WA-S17440/2022 | Omicron | EPI_ISL_9553223 | OM538658 |
| hCoV-19/USA/WA-S17603/2022 | Omicron | EPI_ISL_9638220 | OM571388 |
| hCoV-19/USA/WA-S17541/2022 | Omicron | EPI_ISL_9638159 | OM571327 |
| hCoV-19/USA/WA-S17641/2022 | Omicron | EPI_ISL_9638258 | OM571426 |
| hCoV-19/USA/WA-S17599/2022 | Omicron | EPI_ISL_9638216 | OM571384 |
| hCoV-19/USA/WA-S17438/2022 | Omicron | EPI_ISL_9553221 | OM538656 |
| hCoV-19/USA/WA-S17605/2022 | Omicron | EPI_ISL_9638222 | OM571390 |
| hCoV-19/USA/WA-S17576/2022 | Omicron | EPI_ISL_9638194 | OM571362 |
| hCoV-19/USA/WA-S17595/2022 | Omicron | EPI_ISL_9638212 | OM571380 |
| hCoV-19/USA/WA-S17596/2022 | Omicron | EPI_ISL_9638213 | OM571381 |
| hCoV-19/USA/WA-S17589/2022 | Omicron | EPI_ISL_9638207 | OM571375 |
| hCoV-19/USA/WA-S17554/2022 | Omicron | EPI_ISL_9638172 | OM571340 |
| hCoV-19/USA/WA-S17610/2022 | Omicron | EPI_ISL_9638227 | OM571395 |
| hCoV-19/USA/WA-S17579/2022 | Omicron | EPI_ISL_9638197 | OM571365 |
| hCoV-19/USA/WA-S17600/2022 | Omicron | EPI_ISL_9638217 | OM571385 |
| hCoV-19/USA/WA-S17561/2022 | Omicron | EPI_ISL_9638179 | OM571347 |
| hCoV-19/USA/WA-S17540/2022 | Omicron | EPI_ISL_9638158 | OM571326 |
| hCoV-19/USA/WA-S17638/2022 | Omicron | EPI_ISL_9638255 | OM571423 |
| hCoV-19/USA/WA-S17590/2022 | Omicron | EPI_ISL_9638208 | OM571376 |
| hCoV-19/USA/WA-S17580/2022 | Omicron | EPI_ISL_9638198 | OM571366 |
| hCoV-19/USA/WA-S17445/2022 | Omicron | EPI_ISL_9553228 | OM538663 |
| hCoV-19/USA/WA-S17559/2022 | Omicron | EPI_ISL_9638177 | OM571345 |
| hCoV-19/USA/WA-S17586/2022 | Omicron | EPI_ISL_9638204 | OM571372 |
| hCoV-19/USA/WA-S17577/2022 | Omicron | EPI_ISL_9638195 | OM571363 |
| hCoV-19/USA/WA-S17573/2022 | Omicron | EPI_ISL_9638191 | OM571359 |
| hCoV-19/USA/WA-S17652/2022 | Omicron | EPI_ISL_9638269 | OM571437 |
| hCoV-19/USA/WA-S17652/2022 | Omicron | EPI_ISL_9638180 | OM571348 |
| hCoV-19/USA/WA-S17601/2022 | Omicron | EPI_ISL_9638218 | OM571386 |
| hCoV-19/USA/WA-S17447/2022 | Omicron | EPI_ISL_9553230 | OM538664 |
| hCoV-19/USA/WA-S17651/2022 | Omicron | EPI_ISL_9638268 | OM571436 |
| hCoV-19/USA/WA-S17441/2022 | Omicron | EPI_ISL_9553224 | OM538659 |
| hCoV-19/USA/WA-S17640/2022 | Omicron | EPI_ISL_9638257 | OM571425 |
| hCoV-19/USA/WA-S17444/2022 | Omicron | EPI_ISL_9553227 | OM538662 |
| hCoV-19/USA/WA-S17660/2022 | Omicron | EPI_ISL_9638277 | OM571445 |
| hCoV-19/USA/WA-S17643/2022 | Omicron | EPI_ISL_9638260 | OM571428 |
| hCoV-19/USA/WA-S17654/2022 | Omicron | EPI_ISL_9638271 | OM571439 |
| hCoV-19/USA/WA-S17439/2022 | Omicron | EPI_ISL_9553222 | OM538657 |
| hCoV-19/USA/WA-S17695/2022 | Omicron | EPI_ISL_9638312 | OM571478 |
| hCoV-19/USA/WA-S17443/2022 | Omicron | EPI_ISL_9553226 | OM538661 |
| hCoV-19/USA/WA-S17442/2022 | Omicron | EPI_ISL_9553225 | OM538660 |
| hCoV-19/USA/WA-S17608/2022 | Omicron | EPI_ISL_9638225 | OM571393 |
| hCoV-19/USA/WA-S17623/2022 | Omicron | EPI_ISL_9638240 | OM571408 |
| hCoV-19/USA/WA-S17642/2022 | Omicron | EPI_ISL_9638259 | OM571427 |
| hCoV-19/USA/WA-S17571/2022 | Omicron | EPI_ISL_9638189 | OM571357 |
| hCoV-19/USA/WA-S17606/2022 | Omicron | EPI_ISL_9638223 | OM571391 |
| hCoV-19/USA/WA-S17585/2022 | Omicron | EPI_ISL_9638203 | OM571371 |
| hCoV-19/USA/WA-S17582/2022 | Omicron | EPI_ISL_9638200 | OM571368 |
| hCoV-19/USA/WA-S17594/2022 | Omicron | EPI_ISL_9638211 | OM571379 |

|                            |         |                 |          |
|----------------------------|---------|-----------------|----------|
| hCoV-19/USA/WA-S17644/2022 | Omicron | EPI_ISL_9638261 | OM571429 |
| hCoV-19/USA/WA-S17646/2022 | Omicron | EPI_ISL_9638263 | OM571431 |
| hCoV-19/USA/WA-S17645/2022 | Omicron | EPI_ISL_9638262 | OM571430 |
| hCoV-19/USA/WA-S17555/2022 | Omicron | EPI_ISL_9638173 | OM571341 |
| hCoV-19/USA/WA-S17455/2022 | Omicron | EPI_ISL_9553238 | OM538665 |
| hCoV-19/USA/WA-S17557/2022 | Omicron | EPI_ISL_9638175 | OM571343 |
| hCoV-19/USA/WA-S17556/2022 | Omicron | EPI_ISL_9638174 | OM571342 |
| hCoV-19/USA/WA-S17597/2022 | Omicron | EPI_ISL_9638214 | OM571382 |
| hCoV-19/USA/WA-S17547/2022 | Omicron | EPI_ISL_9638165 | OM571333 |
| hCoV-19/USA/WA-S17539/2022 | Omicron | EPI_ISL_9638157 | OM571325 |
| hCoV-19/USA/WA-S17558/2022 | Omicron | EPI_ISL_9638176 | OM571344 |
| hCoV-19/USA/WA-S17583/2022 | Omicron | EPI_ISL_9638201 | OM571369 |
| hCoV-19/USA/WA-S17574/2022 | Omicron | EPI_ISL_9638192 | OM571360 |
| hCoV-19/USA/WA-S17591/2022 | Omicron | EPI_ISL_9638209 | OM571377 |
| hCoV-19/USA/WA-S17650/2022 | Omicron | EPI_ISL_9638267 | OM571435 |
| hCoV-19/USA/WA-S17656/2022 | Omicron | EPI_ISL_9638273 | OM571441 |
| hCoV-19/USA/WA-S17648/2022 | Omicron | EPI_ISL_9638265 | OM571433 |
| hCoV-19/USA/WA-S17653/2022 | Omicron | EPI_ISL_9638270 | OM571438 |
| hCoV-19/USA/WA-S17630/2022 | Omicron | EPI_ISL_9638247 | OM571415 |
| hCoV-19/USA/WA-S17681/2022 | Omicron | EPI_ISL_9638298 | OM571464 |
| hCoV-19/USA/WA-S17624/2022 | Omicron | EPI_ISL_9638241 | OM571409 |
| hCoV-19/USA/WA-S17724/2022 | Omicron | EPI_ISL_9638341 | OM571507 |
| hCoV-19/USA/WA-S17658/2022 | Omicron | EPI_ISL_9638275 | OM571443 |
| hCoV-19/USA/WA-S17628/2022 | Omicron | EPI_ISL_9638245 | OM571413 |
| hCoV-19/USA/WA-S17672/2022 | Omicron | EPI_ISL_9638289 | OM571455 |
| hCoV-19/USA/WA-S17680/2022 | Omicron | EPI_ISL_9638297 | OM571463 |
| hCoV-19/USA/WA-S17635/2022 | Omicron | EPI_ISL_9638252 | OM571420 |
| hCoV-19/USA/WA-S17664/2022 | Omicron | EPI_ISL_9638281 | OP209796 |
| hCoV-19/USA/WA-S17674/2022 | Omicron | EPI_ISL_9638291 | OM571457 |
| hCoV-19/USA/WA-S17663/2022 | Omicron | EPI_ISL_9638280 | OM571448 |
| hCoV-19/USA/WA-S17723/2022 | Omicron | EPI_ISL_9638340 | OM571506 |
| hCoV-19/USA/WA-S17668/2022 | Omicron | EPI_ISL_9638285 | OP209797 |
| hCoV-19/USA/WA-S17683/2022 | Omicron | EPI_ISL_9638300 | OM571466 |
| hCoV-19/USA/WA-S17673/2022 | Omicron | EPI_ISL_9638290 | OM571456 |
| hCoV-19/USA/WA-S17685/2022 | Omicron | EPI_ISL_9638302 | OM571468 |
| hCoV-19/USA/WA-S17667/2022 | Omicron | EPI_ISL_9638284 | OM571451 |
| hCoV-19/USA/WA-S17694/2022 | Omicron | EPI_ISL_9638311 | OM571477 |
| hCoV-19/USA/WA-S17657/2022 | Omicron | EPI_ISL_9638274 | OM571442 |
| hCoV-19/USA/WA-S17633/2022 | Omicron | EPI_ISL_9638250 | OM571418 |
| hCoV-19/USA/WA-S17686/2022 | Omicron | EPI_ISL_9638303 | OM571469 |
| hCoV-19/USA/WA-S17631/2022 | Omicron | EPI_ISL_9638248 | OM571416 |
| hCoV-19/USA/WA-S17647/2022 | Omicron | EPI_ISL_9638264 | OM571432 |
| hCoV-19/USA/WA-S17616/2022 | Omicron | EPI_ISL_9638233 | OM571401 |
| hCoV-19/USA/WA-S17679/2022 | Omicron | EPI_ISL_9638296 | OM571462 |
| hCoV-19/USA/WA-S17617/2022 | Omicron | EPI_ISL_9638234 | OM571402 |
| hCoV-19/USA/WA-S17701/2022 | Omicron | EPI_ISL_9638318 | OM571484 |
| hCoV-19/USA/WA-S17662/2022 | Omicron | EPI_ISL_9638279 | OM571447 |
| hCoV-19/USA/WA-S17659/2022 | Omicron | EPI_ISL_9638276 | OM571444 |
| hCoV-19/USA/WA-S17666/2022 | Omicron | EPI_ISL_9638283 | OM571450 |
| hCoV-19/USA/WA-S17614/2022 | Omicron | EPI_ISL_9638231 | OM571399 |
| hCoV-19/USA/WA-S17670/2022 | Omicron | EPI_ISL_9638287 | OM571453 |

|                            |         |                 |          |
|----------------------------|---------|-----------------|----------|
| hCoV-19/USA/WA-S17697/2022 | Omicron | EPI_ISL_9638314 | OM571480 |
| hCoV-19/USA/WA-S17619/2022 | Omicron | EPI_ISL_9638236 | OM571404 |
| hCoV-19/USA/WA-S17698/2022 | Omicron | EPI_ISL_9638315 | OM571481 |
| hCoV-19/USA/WA-S17626/2022 | Omicron | EPI_ISL_9638243 | OM571411 |
| hCoV-19/USA/WA-S17627/2022 | Omicron | EPI_ISL_9638244 | OM571412 |
| hCoV-19/USA/WA-S17629/2022 | Omicron | EPI_ISL_9638246 | OM571414 |
| hCoV-19/USA/WA-S17678/2022 | Omicron | EPI_ISL_9638295 | OM571461 |
| hCoV-19/USA/WA-S17613/2022 | Omicron | EPI_ISL_9638230 | OM571398 |
| hCoV-19/USA/WA-S17615/2022 | Omicron | EPI_ISL_9638232 | OM571400 |
| hCoV-19/USA/WA-S17661/2022 | Omicron | EPI_ISL_9638278 | OM571446 |
| hCoV-19/USA/WA-S17693/2022 | Omicron | EPI_ISL_9638310 | OM571476 |
| hCoV-19/USA/WA-S17612/2022 | Omicron | EPI_ISL_9638229 | OM571397 |
| hCoV-19/USA/WA-S17691/2022 | Omicron | EPI_ISL_9638308 | OM571474 |
| hCoV-19/USA/WA-S17684/2022 | Omicron | EPI_ISL_9638301 | OM571467 |
| hCoV-19/USA/WA-S17699/2022 | Omicron | EPI_ISL_9638316 | OM571482 |
| hCoV-19/USA/WA-S17609/2022 | Omicron | EPI_ISL_9638226 | OM571394 |
| hCoV-19/USA/WA-S17637/2022 | Omicron | EPI_ISL_9638254 | OM571422 |
| hCoV-19/USA/WA-S17689/2022 | Omicron | EPI_ISL_9638306 | OM571472 |
| hCoV-19/USA/WA-S17700/2022 | Omicron | EPI_ISL_9638317 | OM571483 |
| hCoV-19/USA/WA-S17720/2022 | Omicron | EPI_ISL_9638337 | OM571503 |
| hCoV-19/USA/WA-S17634/2022 | Omicron | EPI_ISL_9638251 | OM571419 |
| hCoV-19/USA/WA-S17696/2022 | Omicron | EPI_ISL_9638313 | OM571479 |
| hCoV-19/USA/WA-S17636/2022 | Omicron | EPI_ISL_9638253 | OM571421 |
| hCoV-19/USA/WA-S17632/2022 | Omicron | EPI_ISL_9638249 | OM571417 |
| hCoV-19/USA/WA-S17682/2022 | Omicron | EPI_ISL_9638299 | OM571465 |
| hCoV-19/USA/WA-S17677/2022 | Omicron | EPI_ISL_9638294 | OM571460 |
| hCoV-19/USA/WA-S17671/2022 | Omicron | EPI_ISL_9638288 | OM571454 |
| hCoV-19/USA/WA-S17611/2022 | Omicron | EPI_ISL_9638228 | OM571396 |
| hCoV-19/USA/WA-S17687/2022 | Omicron | EPI_ISL_9638304 | OM571470 |
| hCoV-19/USA/WA-S17702/2022 | Omicron | EPI_ISL_9638319 | OM571485 |
| hCoV-19/USA/WA-S17704/2022 | Omicron | EPI_ISL_9638321 | OM571487 |
| hCoV-19/USA/WA-S17726/2022 | Omicron | EPI_ISL_9638343 | OM571509 |
| hCoV-19/USA/WA-S17716/2022 | Omicron | EPI_ISL_9638333 | OM571499 |
| hCoV-19/USA/WA-S17722/2022 | Omicron | EPI_ISL_9638339 | OM571505 |
| hCoV-19/USA/WA-S17713/2022 | Omicron | EPI_ISL_9638330 | OM571496 |
| hCoV-19/USA/WA-S17712/2022 | Omicron | EPI_ISL_9638329 | OM571495 |
| hCoV-19/USA/WA-S17727/2022 | Omicron | EPI_ISL_9638344 | OM571510 |
| hCoV-19/USA/WA-S17714/2022 | Omicron | EPI_ISL_9638331 | OM571497 |
| hCoV-19/USA/WA-S17688/2022 | Omicron | EPI_ISL_9638305 | OM571471 |
| hCoV-19/USA/WA-S17710/2022 | Omicron | EPI_ISL_9638327 | OM571493 |
| hCoV-19/USA/WA-S17705/2022 | Omicron | EPI_ISL_9638322 | OM571488 |
| hCoV-19/USA/WA-S17715/2022 | Omicron | EPI_ISL_9638332 | OM571498 |
| hCoV-19/USA/WA-S17718/2022 | Omicron | EPI_ISL_9638335 | OM571501 |
| hCoV-19/USA/WA-S17708/2022 | Omicron | EPI_ISL_9638325 | OM571491 |
| hCoV-19/USA/WA-S17731/2022 | Omicron | EPI_ISL_9638348 | OM571514 |
| hCoV-19/USA/WA-S17703/2022 | Omicron | EPI_ISL_9638320 | OM571486 |
| hCoV-19/USA/WA-S17706/2022 | Omicron | EPI_ISL_9638323 | OM571489 |
| hCoV-19/USA/WA-S17707/2022 | Omicron | EPI_ISL_9638324 | OM571490 |
| hCoV-19/USA/WA-S17733/2022 | Omicron | EPI_ISL_9638350 | OM571516 |
| hCoV-19/USA/WA-S17709/2022 | Omicron | EPI_ISL_9638326 | OM571492 |
| hCoV-19/USA/WA-S17719/2022 | Omicron | EPI_ISL_9638336 | OM571502 |

|                            |         |                 |          |
|----------------------------|---------|-----------------|----------|
| hCoV-19/USA/WA-S17711/2022 | Omicron | EPI_ISL_9638328 | OM571494 |
| hCoV-19/USA/WA-S17717/2022 | Omicron | EPI_ISL_9638334 | OM571500 |
| hCoV-19/USA/WA-S17721/2022 | Omicron | EPI_ISL_9638338 | OM571504 |
| hCoV-19/USA/WA-S17730/2022 | Omicron | EPI_ISL_9638347 | OM571513 |
| hCoV-19/USA/WA-S17725/2022 | Omicron | EPI_ISL_9638342 | OM571508 |
| hCoV-19/USA/WA-S17732/2022 | Omicron | EPI_ISL_9638349 | OM571515 |
| hCoV-19/USA/WA-S17728/2022 | Omicron | EPI_ISL_9638345 | OM571511 |
| hCoV-19/USA/WA-S17746/2022 | Omicron | EPI_ISL_9638363 | OM571529 |
| hCoV-19/USA/WA-S17754/2022 | Omicron | EPI_ISL_9638371 | OM571537 |
| hCoV-19/USA/WA-S17753/2022 | Omicron | EPI_ISL_9638370 | OM571536 |
| hCoV-19/USA/WA-S17741/2022 | Omicron | EPI_ISL_9638358 | OM571524 |
| hCoV-19/USA/WA-S17738/2022 | Omicron | EPI_ISL_9638355 | OM571521 |
| hCoV-19/USA/WA-S17737/2022 | Omicron | EPI_ISL_9638354 | OM571520 |
| hCoV-19/USA/WA-S17752/2022 | Omicron | EPI_ISL_9638369 | OM571535 |
| hCoV-19/USA/WA-S17750/2022 | Omicron | EPI_ISL_9638367 | OM571533 |
| hCoV-19/USA/WA-S17945/2022 | Omicron | EPI_ISL_9881812 | OM676013 |
| hCoV-19/USA/WA-S17744/2022 | Omicron | EPI_ISL_9638361 | OM571527 |
| hCoV-19/USA/WA-S17743/2022 | Omicron | EPI_ISL_9638360 | OM571526 |
| hCoV-19/USA/WA-S17736/2022 | Omicron | EPI_ISL_9638353 | OM571519 |
| hCoV-19/USA/WA-S17739/2022 | Omicron | EPI_ISL_9638356 | OM571522 |
| hCoV-19/USA/WA-S17747/2022 | Omicron | EPI_ISL_9638364 | OM571530 |
| hCoV-19/USA/WA-S17734/2022 | Omicron | EPI_ISL_9638351 | OM571517 |
| hCoV-19/USA/WA-S17748/2022 | Omicron | EPI_ISL_9638365 | OM571531 |
| hCoV-19/USA/WA-S17740/2022 | Omicron | EPI_ISL_9638357 | OM571523 |
| hCoV-19/USA/WA-S17946/2022 | Omicron | EPI_ISL_9881758 | OM676014 |
| hCoV-19/USA/WA-S17774/2022 | Omicron | EPI_ISL_9638391 | OM571557 |
| hCoV-19/USA/WA-S17938/2022 | Omicron | EPI_ISL_9881535 | OM676006 |
| hCoV-19/USA/WA-S17882/2022 | Omicron | EPI_ISL_9881491 | OM675989 |
| hCoV-19/USA/WA-S17772/2022 | Omicron | EPI_ISL_9638389 | OM571555 |
| hCoV-19/USA/WA-S17939/2022 | Omicron | EPI_ISL_9881536 | OM676007 |
| hCoV-19/USA/WA-S17775/2022 | Omicron | EPI_ISL_9638392 | OM571558 |
| hCoV-19/USA/WA-S17895/2022 | Omicron | EPI_ISL_9881500 | OM675992 |
| hCoV-19/USA/WA-S17759/2022 | Omicron | EPI_ISL_9638376 | OM571542 |
| hCoV-19/USA/WA-S17937/2022 | Omicron | EPI_ISL_9881534 | OM676005 |
| hCoV-19/USA/WA-S17768/2022 | Omicron | EPI_ISL_9638385 | OM571551 |
| hCoV-19/USA/WA-S17778/2022 | Omicron | EPI_ISL_9638395 | OM571561 |
| hCoV-19/USA/WA-S17771/2022 | Omicron | EPI_ISL_9638388 | OM571554 |
| hCoV-19/USA/WA-S17942/2022 | Omicron | EPI_ISL_9881539 | OM676010 |
| hCoV-19/USA/WA-S17943/2022 | Omicron | EPI_ISL_9881799 | OM676011 |
| hCoV-19/USA/WA-S17884/2022 | Omicron | EPI_ISL_9881472 | OM675991 |
| hCoV-19/USA/WA-S17782/2022 | Omicron | EPI_ISL_9638399 | OM571565 |
| hCoV-19/USA/WA-S17767/2022 | Omicron | EPI_ISL_9638384 | OM571550 |
| hCoV-19/USA/WA-S17763/2022 | Omicron | EPI_ISL_9638380 | OM571546 |
| hCoV-19/USA/WA-S17879/2022 | Omicron | EPI_ISL_9881813 | OM675986 |
| hCoV-19/USA/WA-S17948/2022 | Omicron | EPI_ISL_9881541 | OM676016 |
| hCoV-19/USA/WA-S17761/2022 | Omicron | EPI_ISL_9638378 | OM571544 |
| hCoV-19/USA/WA-S17936/2022 | Omicron | EPI_ISL_9881796 | OM676004 |
| hCoV-19/USA/WA-S17770/2022 | Omicron | EPI_ISL_9638387 | OM571553 |
| hCoV-19/USA/WA-S17766/2022 | Omicron | EPI_ISL_9638383 | OM571549 |
| hCoV-19/USA/WA-S17758/2022 | Omicron | EPI_ISL_9638375 | OM571541 |
| hCoV-19/USA/WA-S17776/2022 | Omicron | EPI_ISL_9638393 | OM571559 |

|                            |         |                 |          |
|----------------------------|---------|-----------------|----------|
| hCoV-19/USA/WA-S17757/2022 | Omicron | EPI_ISL_9638374 | OM571540 |
| hCoV-19/USA/WA-S17880/2022 | Omicron | EPI_ISL_9881778 | OM675987 |
| hCoV-19/USA/WA-S17780/2022 | Omicron | EPI_ISL_9638397 | OM571563 |
| hCoV-19/USA/WA-S17755/2022 | Omicron | EPI_ISL_9638372 | OM571538 |
| hCoV-19/USA/WA-S17944/2022 | Omicron | EPI_ISL_9881789 | OM676012 |
| hCoV-19/USA/WA-S17947/2022 | Omicron | EPI_ISL_9881540 | OM676015 |
| hCoV-19/USA/WA-S17777/2022 | Omicron | EPI_ISL_9638394 | OM571560 |
| hCoV-19/USA/WA-S18002/2022 | Omicron | EPI_ISL_9881583 | OM676052 |
| hCoV-19/USA/WA-S17760/2022 | Omicron | EPI_ISL_9638377 | OM571543 |
| hCoV-19/USA/WA-S17751/2022 | Omicron | EPI_ISL_9638368 | OM571534 |
| hCoV-19/USA/WA-S17762/2022 | Omicron | EPI_ISL_9638379 | OM571545 |
| hCoV-19/USA/WA-S17781/2022 | Omicron | EPI_ISL_9638398 | OM571564 |
| hCoV-19/USA/WA-S17765/2022 | Omicron | EPI_ISL_9638382 | OM571548 |
| hCoV-19/USA/WA-S18026/2022 | Omicron | EPI_ISL_9881605 | OM676058 |
| hCoV-19/USA/WA-S17969/2022 | Omicron | EPI_ISL_9881811 | OM676025 |
| hCoV-19/USA/WA-S17985/2022 | Omicron | EPI_ISL_9881569 | OM676041 |
| hCoV-19/USA/WA-S17933/2022 | Omicron | EPI_ISL_9881532 | OM676001 |
| hCoV-19/USA/WA-S17994/2022 | Omicron | EPI_ISL_9881575 | OM676050 |
| hCoV-19/USA/WA-S17974/2022 | Omicron | EPI_ISL_9881562 | OM676030 |
| hCoV-19/USA/WA-S17965/2022 | Omicron | EPI_ISL_9881558 | OM676021 |
| hCoV-19/USA/WA-S17967/2022 | Omicron | EPI_ISL_9881797 | OM676023 |
| hCoV-19/USA/WA-S17984/2022 | Omicron | EPI_ISL_9881568 | OM676040 |
| hCoV-19/USA/WA-S18054/2022 | Omicron | EPI_ISL_9881800 | OM676086 |
| hCoV-19/USA/WA-S17989/2022 | Omicron | EPI_ISL_9881573 | OM676045 |
| hCoV-19/USA/WA-S18056/2022 | Omicron | EPI_ISL_9881625 | OM676088 |
| hCoV-19/USA/WA-S17980/2022 | Omicron | EPI_ISL_9881567 | OM676036 |
| hCoV-19/USA/WA-S17935/2022 | Omicron | EPI_ISL_9881762 | OM676003 |
| hCoV-19/USA/WA-S17977/2022 | Omicron | EPI_ISL_9881564 | OM676033 |
| hCoV-19/USA/WA-S17941/2022 | Omicron | EPI_ISL_9881538 | OM676009 |
| hCoV-19/USA/WA-S17990/2022 | Omicron | EPI_ISL_9881763 | OM676046 |
| hCoV-19/USA/WA-S17979/2022 | Omicron | EPI_ISL_9881566 | OM676035 |
| hCoV-19/USA/WA-S17940/2022 | Omicron | EPI_ISL_9881537 | OM676008 |
| hCoV-19/USA/WA-S17975/2022 | Omicron | EPI_ISL_9881803 | OM676031 |
| hCoV-19/USA/WA-S17976/2022 | Omicron | EPI_ISL_9881563 | OM676032 |
| hCoV-19/USA/WA-S18025/2022 | Omicron | EPI_ISL_9881604 | OM676057 |
| hCoV-19/USA/WA-S17928/2022 | Omicron | EPI_ISL_9881783 | OM675997 |
| hCoV-19/USA/WA-S17929/2022 | Omicron | EPI_ISL_9881529 | OM675998 |
| hCoV-19/USA/WA-S17987/2022 | Omicron | EPI_ISL_9881571 | OM676043 |
| hCoV-19/USA/WA-S17926/2022 | Omicron | EPI_ISL_9881527 | OM675995 |
| hCoV-19/USA/WA-S17982/2022 | Omicron | EPI_ISL_9881473 | OM676038 |
| hCoV-19/USA/WA-S17964/2022 | Omicron | EPI_ISL_9881557 | OM676020 |
| hCoV-19/USA/WA-S17925/2022 | Omicron | EPI_ISL_9881526 | OM675994 |
| hCoV-19/USA/WA-S17981/2022 | Omicron | EPI_ISL_9881810 | OM676037 |
| hCoV-19/USA/WA-S17971/2022 | Omicron | EPI_ISL_9881560 | OM676027 |
| hCoV-19/USA/WA-S18053/2022 | Omicron | EPI_ISL_9881623 | OM676085 |
| hCoV-19/USA/WA-S18049/2022 | Omicron | EPI_ISL_9881620 | OM676081 |
| hCoV-19/USA/WA-S18116/2022 | Omicron | EPI_ISL_9881676 | OM676122 |
| hCoV-19/USA/WA-S17991/2022 | Omicron | EPI_ISL_9881785 | OM676047 |
| hCoV-19/USA/WA-S18052/2022 | Omicron | EPI_ISL_9881791 | OM676084 |
| hCoV-19/USA/WA-S18051/2022 | Omicron | EPI_ISL_9881622 | OM676083 |
| hCoV-19/USA/WA-S17963/2022 | Omicron | EPI_ISL_9881556 | OM676019 |

|                            |         |                 |          |
|----------------------------|---------|-----------------|----------|
| hCoV-19/USA/WA-S17986/2022 | Omicron | EPI_ISL_9881570 | OM676042 |
| hCoV-19/USA/WA-S18117/2022 | Omicron | EPI_ISL_9881677 | OM676123 |
| hCoV-19/USA/WA-S18007/2022 | Omicron | EPI_ISL_9881588 | OM676053 |
| hCoV-19/USA/WA-S17931/2022 | Omicron | EPI_ISL_9881531 | OM676000 |
| hCoV-19/USA/WA-S17973/2022 | Omicron | EPI_ISL_9881561 | OM676029 |
| hCoV-19/USA/WA-S17992/2022 | Omicron | EPI_ISL_9881574 | OM676048 |
| hCoV-19/USA/WA-S18055/2022 | Omicron | EPI_ISL_9881624 | OM676087 |
| hCoV-19/USA/WA-S17993/2022 | Omicron | EPI_ISL_9881809 | OM676049 |
| hCoV-19/USA/WA-S17970/2022 | Omicron | EPI_ISL_9881559 | OM676026 |
| hCoV-19/USA/WA-S17927/2022 | Omicron | EPI_ISL_9881528 | OM675996 |
| hCoV-19/USA/WA-S17962/2022 | Omicron | EPI_ISL_9881555 | OM676018 |
| hCoV-19/USA/WA-S17972/2022 | Omicron | EPI_ISL_9881792 | OM676028 |
| hCoV-19/USA/WA-S18042/2022 | Omicron | EPI_ISL_9881771 | OM676074 |
| hCoV-19/USA/WA-S18036/2022 | Omicron | EPI_ISL_9881794 | OM676068 |
| hCoV-19/USA/WA-S18028/2022 | Omicron | EPI_ISL_9881607 | OM676060 |
| hCoV-19/USA/WA-S18058/2022 | Omicron | EPI_ISL_9881790 | OM676090 |
| hCoV-19/USA/WA-S18070/2022 | Omicron | EPI_ISL_9881634 | OM676102 |
| hCoV-19/USA/WA-S18041/2022 | Omicron | EPI_ISL_9881615 | OM676073 |
| hCoV-19/USA/WA-S18044/2022 | Omicron | EPI_ISL_9881617 | OM676076 |
| hCoV-19/USA/WA-S18050/2022 | Omicron | EPI_ISL_9881621 | OM676082 |
| hCoV-19/USA/WA-S18040/2022 | Omicron | EPI_ISL_9881805 | OM676072 |
| hCoV-19/USA/WA-S18069/2022 | Omicron | EPI_ISL_9881633 | OM676101 |
| hCoV-19/USA/WA-S18110/2022 | Omicron | EPI_ISL_9881670 | OM676119 |
| hCoV-19/USA/WA-S18075/2022 | Omicron | EPI_ISL_9881638 | OM676107 |
| hCoV-19/USA/WA-S18029/2022 | Omicron | EPI_ISL_9881807 | OM676061 |
| hCoV-19/USA/WA-S18034/2022 | Omicron | EPI_ISL_9881611 | OM676066 |
| hCoV-19/USA/WA-S18078/2022 | Omicron | EPI_ISL_9881641 | OM676110 |
| hCoV-19/USA/WA-S18057/2022 | Omicron | EPI_ISL_9881786 | OM676089 |
| hCoV-19/USA/WA-S18104/2022 | Omicron | EPI_ISL_9881664 | OM676113 |
| hCoV-19/USA/WA-S18113/2022 | Omicron | EPI_ISL_9881673 | OM676121 |
| hCoV-19/USA/WA-S18064/2022 | Omicron | EPI_ISL_9881773 | OM676096 |
| hCoV-19/USA/WA-S18061/2022 | Omicron | EPI_ISL_9881628 | OM676093 |
| hCoV-19/USA/WA-S18062/2022 | Omicron | EPI_ISL_9881629 | OM676094 |
| hCoV-19/USA/WA-S18031/2022 | Omicron | EPI_ISL_9881609 | OM676063 |
| hCoV-19/USA/WA-S18077/2022 | Omicron | EPI_ISL_9881640 | OM676109 |
| hCoV-19/USA/WA-S18068/2022 | Omicron | EPI_ISL_9881632 | OM676100 |
| hCoV-19/USA/WA-S18066/2022 | Omicron | EPI_ISL_9881793 | OM676098 |
| hCoV-19/USA/WA-S18046/2022 | Omicron | EPI_ISL_9881618 | OM676078 |
| hCoV-19/USA/WA-S18035/2022 | Omicron | EPI_ISL_9881474 | OM676067 |
| hCoV-19/USA/WA-S18045/2022 | Omicron | EPI_ISL_9881772 | OM676077 |
| hCoV-19/USA/WA-S18121/2022 | Omicron | EPI_ISL_9881681 | OM676125 |
| hCoV-19/USA/WA-S18067/2022 | Omicron | EPI_ISL_9881631 | OM676099 |
| hCoV-19/USA/WA-S18043/2022 | Omicron | EPI_ISL_9881616 | OM676075 |
| hCoV-19/USA/WA-S18105/2022 | Omicron | EPI_ISL_9881665 | OM676114 |
| hCoV-19/USA/WA-S18109/2022 | Omicron | EPI_ISL_9881669 | OM676118 |
| hCoV-19/USA/WA-S18124/2022 | Omicron | EPI_ISL_9881476 | OM676128 |
| hCoV-19/USA/WA-S18142/2022 | Omicron | EPI_ISL_9881478 | OM676146 |
| hCoV-19/USA/WA-S18125/2022 | Omicron | EPI_ISL_9881477 | OM676129 |
| hCoV-19/USA/WA-S18071/2022 | Omicron | EPI_ISL_9881635 | OM676103 |
| hCoV-19/USA/WA-S18072/2022 | Omicron | EPI_ISL_9881636 | OM676104 |
| hCoV-19/USA/WA-S18087/2022 | Omicron | EPI_ISL_9881649 | OM676111 |



|                            |         |                  |          |
|----------------------------|---------|------------------|----------|
| hCoV-19/USA/WA-S18076/2022 | Omicron | EPI_ISL_9881639  | OM676108 |
| hCoV-19/USA/WA-S18024/2022 | Omicron | EPI_ISL_9881603  | OM676056 |
| hCoV-19/USA/WA-S18106/2022 | Omicron | EPI_ISL_9881666  | OM676115 |
| hCoV-19/USA/WA-S18108/2022 | Omicron | EPI_ISL_9881668  | OM676117 |
| hCoV-19/USA/WA-S18103/2022 | Omicron | EPI_ISL_9881663  | OM676112 |
| hCoV-19/USA/WA-S18073/2022 | Omicron | EPI_ISL_9881475  | OM676105 |
| hCoV-19/USA/WA-S18107/2022 | Omicron | EPI_ISL_9881667  | OM676116 |
| hCoV-19/USA/WA-S18023/2022 | Omicron | EPI_ISL_9881602  | OM676055 |
| hCoV-19/USA/WA-S18324/2022 | Omicron | EPI_ISL_10570943 | OM886453 |
| hCoV-19/USA/WA-S18065/2022 | Omicron | EPI_ISL_9881471  | OM676097 |
| hCoV-19/USA/WA-S18048/2022 | Omicron | EPI_ISL_9881619  | OM676080 |
| hCoV-19/USA/WA-S18022/2022 | Omicron | EPI_ISL_9881787  | OM676054 |
| hCoV-19/USA/WA-S18037/2022 | Omicron | EPI_ISL_9881612  | OM676069 |
| hCoV-19/USA/WA-S18063/2022 | Omicron | EPI_ISL_9881630  | OM676095 |
| hCoV-19/USA/WA-S18112/2022 | Omicron | EPI_ISL_9881672  | OM676120 |
| hCoV-19/USA/WA-S18120/2022 | Omicron | EPI_ISL_9881680  | OM676124 |
| hCoV-19/USA/WA-S18047/2022 | Omicron | EPI_ISL_9881759  | OM676079 |
| hCoV-19/USA/WA-S18027/2022 | Omicron | EPI_ISL_9881606  | OM676059 |
| hCoV-19/USA/WA-S18039/2022 | Omicron | EPI_ISL_9881614  | OM676071 |
| hCoV-19/USA/WA-S18032/2022 | Omicron | EPI_ISL_9881610  | OM676064 |
| hCoV-19/USA/WA-S18143/2022 | Omicron | EPI_ISL_9881804  | OM676147 |
| hCoV-19/USA/WA-S18138/2022 | Omicron | EPI_ISL_9881693  | OM676142 |
| hCoV-19/USA/WA-S18295/2022 | Omicron | EPI_ISL_10570916 | OM886444 |
| hCoV-19/USA/WA-S18132/2022 | Omicron | EPI_ISL_9881688  | OM676136 |
| hCoV-19/USA/WA-S18297/2022 | Omicron | EPI_ISL_10570918 | OM886446 |
| hCoV-19/USA/WA-S18299/2022 | Omicron | EPI_ISL_10570920 | OM886448 |
| hCoV-19/USA/WA-S18294/2022 | Omicron | EPI_ISL_10570915 | OM886443 |
| hCoV-19/USA/WA-S18291/2022 | Omicron | EPI_ISL_10570912 | OM886440 |
| hCoV-19/USA/WA-S18130/2022 | Omicron | EPI_ISL_9881686  | OM676134 |
| hCoV-19/USA/WA-S18139/2022 | Omicron | EPI_ISL_9881470  | OM676143 |
| hCoV-19/USA/WA-S18151/2022 | Omicron | EPI_ISL_9881780  | OM676155 |
| hCoV-19/USA/WA-S18134/2022 | Omicron | EPI_ISL_9881690  | OM676138 |
| hCoV-19/USA/WA-S18128/2022 | Omicron | EPI_ISL_9881814  | OM676132 |
| hCoV-19/USA/WA-S18293/2022 | Omicron | EPI_ISL_10570914 | OM886442 |
| hCoV-19/USA/WA-S18149/2022 | Omicron | EPI_ISL_9881698  | OM676153 |
| hCoV-19/USA/WA-S18292/2022 | Omicron | EPI_ISL_10570913 | OM886441 |
| hCoV-19/USA/WA-S18131/2022 | Omicron | EPI_ISL_9881687  | OM676135 |
| hCoV-19/USA/WA-S18325/2022 | Omicron | EPI_ISL_10570944 | OM886454 |
| hCoV-19/USA/WA-S18141/2022 | Omicron | EPI_ISL_9881695  | OM676145 |
| hCoV-19/USA/WA-S18136/2022 | Omicron | EPI_ISL_9881774  | OM676140 |
| hCoV-19/USA/WA-S18298/2022 | Omicron | EPI_ISL_10570919 | OM886447 |
| hCoV-19/USA/WA-S18123/2022 | Omicron | EPI_ISL_9881683  | OM676127 |
| hCoV-19/USA/WA-S18145/2022 | Omicron | EPI_ISL_9881696  | OM676149 |
| hCoV-19/USA/WA-S18336/2022 | Omicron | EPI_ISL_10570955 | OM886465 |
| hCoV-19/USA/WA-S18135/2022 | Omicron | EPI_ISL_9881691  | OM676139 |
| hCoV-19/USA/WA-S18129/2022 | Omicron | EPI_ISL_9881685  | OM676133 |
| hCoV-19/USA/WA-S18146/2022 | Omicron | EPI_ISL_9881784  | OM676150 |
| hCoV-19/USA/WA-S18150/2022 | Omicron | EPI_ISL_9881699  | OM676154 |
| hCoV-19/USA/WA-S18133/2022 | Omicron | EPI_ISL_9881689  | OM676137 |
| hCoV-19/USA/WA-S18137/2022 | Omicron | EPI_ISL_9881692  | OM676141 |
| hCoV-19/USA/WA-S18300/2022 | Omicron | EPI_ISL_10570921 | OM886449 |

|                            |         |                  |          |
|----------------------------|---------|------------------|----------|
| hCoV-19/USA/WA-S18140/2022 | Omicron | EPI_ISL_9881694  | OM676144 |
| hCoV-19/USA/WA-S18335/2022 | Omicron | EPI_ISL_10570954 | OM886464 |
| hCoV-19/USA/WA-S18147/2022 | Omicron | EPI_ISL_9881795  | OM676151 |
| hCoV-19/USA/WA-S18122/2022 | Omicron | EPI_ISL_9881682  | OM676126 |
| hCoV-19/USA/WA-S18127/2022 | Omicron | EPI_ISL_9881806  | OM676131 |
| hCoV-19/USA/WA-S18296/2022 | Omicron | EPI_ISL_10570917 | OM886445 |
| hCoV-19/USA/WA-S18323/2022 | Omicron | EPI_ISL_10570942 | OM886452 |
| hCoV-19/USA/WA-S18126/2022 | Omicron | EPI_ISL_9881684  | OM676130 |
| hCoV-19/USA/WA-S18302/2022 | Omicron | EPI_ISL_10570923 | OM886451 |
| hCoV-19/USA/WA-S18334/2022 | Omicron | EPI_ISL_10570953 | OM886463 |
| hCoV-19/USA/WA-S18342/2022 | Omicron | EPI_ISL_10570961 | OM886466 |
| hCoV-19/USA/WA-S18331/2022 | Omicron | EPI_ISL_10570950 | OM886460 |
| hCoV-19/USA/WA-S18329/2022 | Omicron | EPI_ISL_10570948 | OM886458 |
| hCoV-19/USA/WA-S18332/2022 | Omicron | EPI_ISL_10570951 | OM886461 |
| hCoV-19/USA/WA-S18330/2022 | Omicron | EPI_ISL_10570949 | OM886459 |
| hCoV-19/USA/WA-S18327/2022 | Omicron | EPI_ISL_10570946 | OM886456 |
| hCoV-19/USA/WA-S18328/2022 | Omicron | EPI_ISL_10570947 | OM886457 |
| hCoV-19/USA/WA-S18333/2022 | Omicron | EPI_ISL_10570952 | OM886462 |
| hCoV-19/USA/WA-S18406/2022 | Omicron | EPI_ISL_10571023 | OM886479 |
| hCoV-19/USA/WA-S18401/2022 | Omicron | EPI_ISL_10571018 | OM886474 |
| hCoV-19/USA/WA-S18407/2022 | Omicron | EPI_ISL_10571024 | OM886480 |
| hCoV-19/USA/WA-S18403/2022 | Omicron | EPI_ISL_10571020 | OM886476 |
| hCoV-19/USA/WA-S18402/2022 | Omicron | EPI_ISL_10571019 | OM886475 |
| hCoV-19/USA/WA-S18399/2022 | Omicron | EPI_ISL_10571016 | OM886472 |
| hCoV-19/USA/WA-S18408/2022 | Omicron | EPI_ISL_10571025 | OM886481 |
| hCoV-19/USA/WA-S18405/2022 | Omicron | EPI_ISL_10571022 | OM886478 |
| hCoV-19/USA/WA-S18397/2022 | Omicron | EPI_ISL_10571014 | OM886470 |
| hCoV-19/USA/WA-S18404/2022 | Omicron | EPI_ISL_10571021 | OM886477 |
| hCoV-19/USA/WA-S18425/2022 | Omicron | EPI_ISL_10571042 | OM886490 |
| hCoV-19/USA/WA-S18418/2022 | Omicron | EPI_ISL_10571035 | OM886483 |
| hCoV-19/USA/WA-S18444/2022 | Omicron | EPI_ISL_10571060 | OM886508 |
| hCoV-19/USA/WA-S18400/2022 | Omicron | EPI_ISL_10571017 | OM886473 |
| hCoV-19/USA/WA-S18424/2022 | Omicron | EPI_ISL_10571041 | OM886489 |
| hCoV-19/USA/WA-S18448/2022 | Omicron | EPI_ISL_10571064 | OM886512 |
| hCoV-19/USA/WA-S18423/2022 | Omicron | EPI_ISL_10571040 | OM886488 |
| hCoV-19/USA/WA-S18398/2022 | Omicron | EPI_ISL_10571015 | OM886471 |
| hCoV-19/USA/WA-S18447/2022 | Omicron | EPI_ISL_10571063 | OM886511 |
| hCoV-19/USA/WA-S18452/2022 | Omicron | EPI_ISL_10571068 | OM886515 |
| hCoV-19/USA/WA-S18440/2022 | Omicron | EPI_ISL_10571057 | OM886505 |
| hCoV-19/USA/WA-S18426/2022 | Omicron | EPI_ISL_10571043 | OM886491 |
| hCoV-19/USA/WA-S18450/2022 | Omicron | EPI_ISL_10571066 | OM886513 |
| hCoV-19/USA/WA-S18446/2022 | Omicron | EPI_ISL_10571062 | OM886510 |
| hCoV-19/USA/WA-S18445/2022 | Omicron | EPI_ISL_10571061 | OM886509 |
| hCoV-19/USA/WA-S18434/2022 | Omicron | EPI_ISL_10571051 | OM886499 |
| hCoV-19/USA/WA-S18432/2022 | Omicron | EPI_ISL_10571049 | OM886497 |
| hCoV-19/USA/WA-S18429/2022 | Omicron | EPI_ISL_10571046 | OM886494 |
| hCoV-19/USA/WA-S18417/2022 | Omicron | EPI_ISL_10571034 | OM886482 |
| hCoV-19/USA/WA-S18455/2022 | Omicron | EPI_ISL_10571071 | OM886518 |
| hCoV-19/USA/WA-S18435/2022 | Omicron | EPI_ISL_10571052 | OM886500 |
| hCoV-19/USA/WA-S18419/2022 | Omicron | EPI_ISL_10571036 | OM886484 |
| hCoV-19/USA/WA-S18453/2022 | Omicron | EPI_ISL_10571069 | OM886516 |

|                            |         |                  |          |
|----------------------------|---------|------------------|----------|
| hCoV-19/USA/WA-S17798/2022 | Omicron | EPI_ISL_9638415  | OM571581 |
| hCoV-19/USA/WA-S18433/2022 | Omicron | EPI_ISL_10571050 | OM886498 |
| hCoV-19/USA/WA-S18437/2022 | Omicron | EPI_ISL_10571054 | OM886502 |
| hCoV-19/USA/WA-S18420/2022 | Omicron | EPI_ISL_10571037 | OM886485 |
| hCoV-19/USA/WA-S18439/2022 | Omicron | EPI_ISL_10571056 | OM886504 |
| hCoV-19/USA/WA-S17785/2022 | Omicron | EPI_ISL_9638402  | OM571568 |
| hCoV-19/USA/WA-S18442/2022 | Omicron | EPI_ISL_10571059 | OM886507 |
| hCoV-19/USA/WA-S18456/2022 | Omicron | EPI_ISL_10571072 | OM886519 |
| hCoV-19/USA/WA-S18438/2022 | Omicron | EPI_ISL_10571055 | OM886503 |
| hCoV-19/USA/WA-S18430/2022 | Omicron | EPI_ISL_10571047 | OM886495 |
| hCoV-19/USA/WA-S18428/2022 | Omicron | EPI_ISL_10571045 | OM886493 |
| hCoV-19/USA/WA-S18421/2022 | Omicron | EPI_ISL_10571038 | OM886486 |
| hCoV-19/USA/WA-S17786/2022 | Omicron | EPI_ISL_9638403  | OM571569 |
| hCoV-19/USA/WA-S18422/2022 | Omicron | EPI_ISL_10571039 | OM886487 |
| hCoV-19/USA/WA-S18441/2022 | Omicron | EPI_ISL_10571058 | OM886506 |
| hCoV-19/USA/WA-S18436/2022 | Omicron | EPI_ISL_10571053 | OM886501 |
| hCoV-19/USA/WA-S18451/2022 | Omicron | EPI_ISL_10571067 | OM886514 |
| hCoV-19/USA/WA-S18431/2022 | Omicron | EPI_ISL_10571048 | OM886496 |
| hCoV-19/USA/WA-S18466/2022 | Omicron | EPI_ISL_10571082 | OM886529 |
| hCoV-19/USA/WA-S17788/2022 | Omicron | EPI_ISL_9638405  | OM571571 |
| hCoV-19/USA/WA-S18460/2022 | Omicron | EPI_ISL_10571076 | OM886523 |
| hCoV-19/USA/WA-S18459/2022 | Omicron | EPI_ISL_10571075 | OM886522 |
| hCoV-19/USA/WA-S17799/2022 | Omicron | EPI_ISL_9638416  | OM571582 |
| hCoV-19/USA/WA-S17797/2022 | Omicron | EPI_ISL_9638414  | OM571580 |
| hCoV-19/USA/WA-S17791/2022 | Omicron | EPI_ISL_9638408  | OM571574 |
| hCoV-19/USA/WA-S17787/2022 | Omicron | EPI_ISL_9638404  | OM571570 |
| hCoV-19/USA/WA-S17794/2022 | Omicron | EPI_ISL_9638411  | OM571577 |
| hCoV-19/USA/WA-S18465/2022 | Omicron | EPI_ISL_10571081 | OM886528 |
| hCoV-19/USA/WA-S17800/2022 | Omicron | EPI_ISL_9638417  | OM571583 |
| hCoV-19/USA/WA-S18461/2022 | Omicron | EPI_ISL_10571077 | OM886524 |
| hCoV-19/USA/WA-S17796/2022 | Omicron | EPI_ISL_9638413  | OM571579 |
| hCoV-19/USA/WA-S18464/2022 | Omicron | EPI_ISL_10571080 | OM886527 |
| hCoV-19/USA/WA-S17789/2022 | Omicron | EPI_ISL_9638406  | OM571572 |
| hCoV-19/USA/WA-S18457/2022 | Omicron | EPI_ISL_10571073 | OM886520 |
| hCoV-19/USA/WA-S17793/2022 | Omicron | EPI_ISL_9638410  | OM571576 |
| hCoV-19/USA/WA-S18462/2022 | Omicron | EPI_ISL_10571078 | OM886525 |
| hCoV-19/USA/WA-S17783/2022 | Omicron | EPI_ISL_9638400  | OM571566 |
| hCoV-19/USA/WA-S17802/2022 | Omicron | EPI_ISL_9638419  | OM571585 |
| hCoV-19/USA/WA-S18477/2022 | Omicron | EPI_ISL_10571093 | OM886540 |
| hCoV-19/USA/WA-S17784/2022 | Omicron | EPI_ISL_9638401  | OM571567 |
| hCoV-19/USA/WA-S18458/2022 | Omicron | EPI_ISL_10571074 | OM886521 |
| hCoV-19/USA/WA-S17792/2022 | Omicron | EPI_ISL_9638409  | OM571575 |
| hCoV-19/USA/WA-S17795/2022 | Omicron | EPI_ISL_9638412  | OM571578 |
| hCoV-19/USA/WA-S17804/2022 | Omicron | EPI_ISL_9638421  | OM571587 |
| hCoV-19/USA/WA-S17805/2022 | Omicron | EPI_ISL_9638422  | OM571588 |
| hCoV-19/USA/WA-S17808/2022 | Omicron | EPI_ISL_9638425  | OM571591 |
| hCoV-19/USA/WA-S17806/2022 | Omicron | EPI_ISL_9638423  | OM571589 |
| hCoV-19/USA/WA-S18471/2022 | Omicron | EPI_ISL_10571087 | OM886534 |
| hCoV-19/USA/WA-S18467/2022 | Omicron | EPI_ISL_10571083 | OM886530 |
| hCoV-19/USA/WA-S18463/2022 | Omicron | EPI_ISL_10571079 | OM886526 |
| hCoV-19/USA/WA-S18472/2022 | Omicron | EPI_ISL_10571088 | OM886535 |

|                            |         |                  |          |
|----------------------------|---------|------------------|----------|
| hCoV-19/USA/WA-S18475/2022 | Omicron | EPI_ISL_10571091 | OM886538 |
| hCoV-19/USA/WA-S18474/2022 | Omicron | EPI_ISL_10571090 | OM886537 |
| hCoV-19/USA/WA-S17801/2022 | Omicron | EPI_ISL_9638418  | OM571584 |
| hCoV-19/USA/WA-S18479/2022 | Omicron | EPI_ISL_10571095 | OM886542 |
| hCoV-19/USA/WA-S17803/2022 | Omicron | EPI_ISL_9638420  | OM571586 |
| hCoV-19/USA/WA-S18476/2022 | Omicron | EPI_ISL_10571092 | OM886539 |
| hCoV-19/USA/WA-S18473/2022 | Omicron | EPI_ISL_10571089 | OM886536 |
| hCoV-19/USA/WA-S18489/2022 | Omicron | EPI_ISL_10571105 | OM886552 |
| hCoV-19/USA/WA-S18470/2022 | Omicron | EPI_ISL_10571086 | OM886533 |
| hCoV-19/USA/WA-S17807/2022 | Omicron | EPI_ISL_9638424  | OM571590 |
| hCoV-19/USA/WA-S18469/2022 | Omicron | EPI_ISL_10571085 | OM886532 |
| hCoV-19/USA/WA-S18468/2022 | Omicron | EPI_ISL_10571084 | OM886531 |
| hCoV-19/USA/WA-S18492/2022 | Omicron | EPI_ISL_10571108 | OM886555 |
| hCoV-19/USA/WA-S18496/2022 | Omicron | EPI_ISL_10571112 | OM886559 |
| hCoV-19/USA/WA-S18490/2022 | Omicron | EPI_ISL_10571106 | OM886553 |
| hCoV-19/USA/WA-S18485/2022 | Omicron | EPI_ISL_10571101 | OM886548 |
| hCoV-19/USA/WA-S18487/2022 | Omicron | EPI_ISL_10571103 | OM886550 |
| hCoV-19/USA/WA-S18478/2022 | Omicron | EPI_ISL_10571094 | OM886541 |
| hCoV-19/USA/WA-S18482/2022 | Omicron | EPI_ISL_10571098 | OM886545 |
| hCoV-19/USA/WA-S18498/2022 | Omicron | EPI_ISL_10571114 | OM886561 |
| hCoV-19/USA/WA-S18480/2022 | Omicron | EPI_ISL_10571096 | OM886543 |
| hCoV-19/USA/WA-S18500/2022 | Omicron | EPI_ISL_10571116 | OM886563 |
| hCoV-19/USA/WA-S18495/2022 | Omicron | EPI_ISL_10571111 | OM886558 |
| hCoV-19/USA/WA-S18481/2022 | Omicron | EPI_ISL_10571097 | OM886544 |
| hCoV-19/USA/WA-S18491/2022 | Omicron | EPI_ISL_10571107 | OM886554 |
| hCoV-19/USA/WA-S18483/2022 | Omicron | EPI_ISL_10571099 | OM886546 |
| hCoV-19/USA/WA-S18501/2022 | Omicron | EPI_ISL_10571117 | OM886564 |
| hCoV-19/USA/WA-S18497/2022 | Omicron | EPI_ISL_10571113 | OM886560 |
| hCoV-19/USA/WA-S18499/2022 | Omicron | EPI_ISL_10571115 | OM886562 |
| hCoV-19/USA/WA-S18486/2022 | Omicron | EPI_ISL_10571102 | OM886549 |
| hCoV-19/USA/WA-S18504/2022 | Omicron | EPI_ISL_10571120 | OM886567 |
| hCoV-19/USA/WA-S18503/2022 | Omicron | EPI_ISL_10571119 | OM886566 |
| hCoV-19/USA/WA-S18502/2022 | Omicron | EPI_ISL_10571118 | OM886565 |
| hCoV-19/USA/WA-S18509/2022 | Omicron | EPI_ISL_10571125 | OM886572 |
| hCoV-19/USA/WA-S18508/2022 | Omicron | EPI_ISL_10571124 | OM886571 |
| hCoV-19/USA/WA-S18510/2022 | Omicron | EPI_ISL_10571126 | OM886573 |
| hCoV-19/USA/WA-S18506/2022 | Omicron | EPI_ISL_10571122 | OM886569 |
| hCoV-19/USA/WA-S18521/2022 | Omicron | EPI_ISL_10571137 | OM886584 |
| hCoV-19/USA/WA-S18517/2022 | Omicron | EPI_ISL_10571133 | OM886580 |
| hCoV-19/USA/WA-S18512/2022 | Omicron | EPI_ISL_10571128 | OM886575 |
| hCoV-19/USA/WA-S18518/2022 | Omicron | EPI_ISL_10571134 | OM886581 |
| hCoV-19/USA/WA-S18519/2022 | Omicron | EPI_ISL_10571135 | OM886582 |
| hCoV-19/USA/WA-S18522/2022 | Omicron | EPI_ISL_10571138 | OM886585 |
| hCoV-19/USA/WA-S18513/2022 | Omicron | EPI_ISL_10571129 | OM886576 |
| hCoV-19/USA/WA-S18515/2022 | Omicron | EPI_ISL_10571131 | OM886578 |
| hCoV-19/USA/WA-S18523/2022 | Omicron | EPI_ISL_10571139 | OM886586 |
| hCoV-19/USA/WA-S18511/2022 | Omicron | EPI_ISL_10571127 | OM886574 |
| hCoV-19/USA/WA-S18524/2022 | Omicron | EPI_ISL_10571140 | OM886587 |
| hCoV-19/USA/WA-S18516/2022 | Omicron | EPI_ISL_10571132 | OM886579 |
| hCoV-19/USA/WA-S18514/2022 | Omicron | EPI_ISL_10571130 | OM886577 |
| hCoV-19/USA/WA-S18525/2022 | Omicron | EPI_ISL_10571141 | OM886588 |

|                            |         |                  |          |
|----------------------------|---------|------------------|----------|
| hCoV-19/USA/WA-S18520/2022 | Omicron | EPI_ISL_10571136 | OM886583 |
| hCoV-19/USA/WA-S18526/2022 | Omicron | EPI_ISL_10571142 | OM886589 |
| hCoV-19/USA/WA-S18528/2022 | Omicron | EPI_ISL_10571144 | OM886591 |
| hCoV-19/USA/WA-S18533/2022 | Omicron | EPI_ISL_10571149 | OM886596 |
| hCoV-19/USA/WA-S18527/2022 | Omicron | EPI_ISL_10571143 | OM886590 |
| hCoV-19/USA/WA-S18535/2022 | Omicron | EPI_ISL_10571151 | OM886598 |
| hCoV-19/USA/WA-S18530/2022 | Omicron | EPI_ISL_10571146 | OM886593 |
| hCoV-19/USA/WA-S18536/2022 | Omicron | EPI_ISL_10571152 | OM886599 |
| hCoV-19/USA/WA-S18537/2022 | Omicron | EPI_ISL_10571153 | OM886600 |
| hCoV-19/USA/WA-S18548/2022 | Omicron | EPI_ISL_10571164 | OM886611 |
| hCoV-19/USA/WA-S18547/2022 | Omicron | EPI_ISL_10571163 | OM886610 |
| hCoV-19/USA/WA-S18540/2022 | Omicron | EPI_ISL_10571156 | OM886603 |
| hCoV-19/USA/WA-S18529/2022 | Omicron | EPI_ISL_10571145 | OM886592 |
| hCoV-19/USA/WA-S18549/2022 | Omicron | EPI_ISL_10571165 | OM886612 |
| hCoV-19/USA/WA-S18531/2022 | Omicron | EPI_ISL_10571147 | OM886594 |
| hCoV-19/USA/WA-S18532/2022 | Omicron | EPI_ISL_10571148 | OM886595 |
| hCoV-19/USA/WA-S18538/2022 | Omicron | EPI_ISL_10571154 | OM886601 |
| hCoV-19/USA/WA-S18534/2022 | Omicron | EPI_ISL_10571150 | OM886597 |
| hCoV-19/USA/WA-S18545/2022 | Omicron | EPI_ISL_10571161 | OM886608 |
| hCoV-19/USA/WA-S18552/2022 | Omicron | EPI_ISL_10571168 | OM886615 |
| hCoV-19/USA/WA-S18546/2022 | Omicron | EPI_ISL_10571162 | OM886609 |
| hCoV-19/USA/WA-S18550/2022 | Omicron | EPI_ISL_10571166 | OM886613 |
| hCoV-19/USA/WA-S18563/2022 | Omicron | EPI_ISL_10571179 | OM886626 |
| hCoV-19/USA/WA-S18542/2022 | Omicron | EPI_ISL_10571158 | OM886605 |
| hCoV-19/USA/WA-S18556/2022 | Omicron | EPI_ISL_10571172 | OM886619 |
| hCoV-19/USA/WA-S18555/2022 | Omicron | EPI_ISL_10571171 | OM886618 |
| hCoV-19/USA/WA-S18553/2022 | Omicron | EPI_ISL_10571169 | OM886616 |
| hCoV-19/USA/WA-S18566/2022 | Omicron | EPI_ISL_10571182 | OM886629 |
| hCoV-19/USA/WA-S18543/2022 | Omicron | EPI_ISL_10571159 | OM886606 |
| hCoV-19/USA/WA-S18557/2022 | Omicron | EPI_ISL_10571173 | OM886620 |
| hCoV-19/USA/WA-S18551/2022 | Omicron | EPI_ISL_10571167 | OM886614 |
| hCoV-19/USA/WA-S18544/2022 | Omicron | EPI_ISL_10571160 | OM886607 |
| hCoV-19/USA/WA-S18562/2022 | Omicron | EPI_ISL_10571178 | OM886625 |
| hCoV-19/USA/WA-S18564/2022 | Omicron | EPI_ISL_10571180 | OM886627 |
| hCoV-19/USA/WA-S18572/2022 | Omicron | EPI_ISL_10571188 | OM886634 |
| hCoV-19/USA/WA-S18554/2022 | Omicron | EPI_ISL_10571170 | OM886617 |
| hCoV-19/USA/WA-S18560/2022 | Omicron | EPI_ISL_10571176 | OM886623 |
| hCoV-19/USA/WA-S18571/2022 | Omicron | EPI_ISL_10571187 | OM886633 |
| hCoV-19/USA/WA-S18582/2022 | Omicron | EPI_ISL_10571198 | OM886643 |
| hCoV-19/USA/WA-S18559/2022 | Omicron | EPI_ISL_10571175 | OM886622 |
| hCoV-19/USA/WA-S18570/2022 | Omicron | EPI_ISL_10571186 | OM886632 |
| hCoV-19/USA/WA-S18569/2022 | Omicron | EPI_ISL_10571185 | OP209798 |
| hCoV-19/USA/WA-S18573/2022 | Omicron | EPI_ISL_10571189 | OM886635 |
| hCoV-19/USA/WA-S18567/2022 | Omicron | EPI_ISL_10571183 | OM886630 |
| hCoV-19/USA/WA-S18575/2022 | Omicron | EPI_ISL_10571191 | OM886637 |
| hCoV-19/USA/WA-S18568/2022 | Omicron | EPI_ISL_10571184 | OM886631 |
| hCoV-19/USA/WA-S18558/2022 | Omicron | EPI_ISL_10571174 | OM886621 |
| hCoV-19/USA/WA-S18574/2022 | Omicron | EPI_ISL_10571190 | OM886636 |
| hCoV-19/USA/WA-S18576/2022 | Omicron | EPI_ISL_10571192 | OM886638 |
| hCoV-19/USA/WA-S18587/2022 | Omicron | EPI_ISL_10571203 | OM886648 |
| hCoV-19/USA/WA-S18580/2022 | Omicron | EPI_ISL_10571196 | OM886641 |

|                            |         |                  |          |
|----------------------------|---------|------------------|----------|
| hCoV-19/USA/WA-S18589/2022 | Omicron | EPI_ISL_10571205 | OM886650 |
| hCoV-19/USA/WA-S18578/2022 | Omicron | EPI_ISL_10571194 | OM886640 |
| hCoV-19/USA/WA-S18583/2022 | Omicron | EPI_ISL_10571199 | OM886644 |
| hCoV-19/USA/WA-S18579/2022 | Omicron | EPI_ISL_10571195 | OP209799 |
| hCoV-19/USA/WA-S18577/2022 | Omicron | EPI_ISL_10571193 | OM886639 |
| hCoV-19/USA/WA-S18581/2022 | Omicron | EPI_ISL_10571197 | OM886642 |
| hCoV-19/USA/WA-S18584/2022 | Omicron | EPI_ISL_10571200 | OM886645 |
| hCoV-19/USA/WA-S18585/2022 | Omicron | EPI_ISL_10571201 | OM886646 |
| hCoV-19/USA/WA-S18586/2022 | Omicron | EPI_ISL_10571202 | OM886647 |
| hCoV-19/USA/WA-S18596/2022 | Omicron | EPI_ISL_10571211 | OM886656 |
| hCoV-19/USA/WA-S18603/2022 | Omicron | EPI_ISL_10571218 | OM886663 |
| hCoV-19/USA/WA-S18599/2022 | Omicron | EPI_ISL_10571214 | OM886659 |
| hCoV-19/USA/WA-S18609/2022 | Omicron | EPI_ISL_10571224 | OM886669 |
| hCoV-19/USA/WA-S18601/2022 | Omicron | EPI_ISL_10571216 | OM886661 |
| hCoV-19/USA/WA-S18594/2022 | Omicron | EPI_ISL_10571209 | OM886654 |
| hCoV-19/USA/WA-S18604/2022 | Omicron | EPI_ISL_10571219 | OM886664 |
| hCoV-19/USA/WA-S18597/2022 | Omicron | EPI_ISL_10571212 | OM886657 |
| hCoV-19/USA/WA-S18590/2022 | Omicron | EPI_ISL_10571206 | OM886651 |
| hCoV-19/USA/WA-S18605/2022 | Omicron | EPI_ISL_10571220 | OM886665 |
| hCoV-19/USA/WA-S18602/2022 | Omicron | EPI_ISL_10571217 | OM886662 |
| hCoV-19/USA/WA-S18592/2022 | Omicron | EPI_ISL_10571207 | OM886652 |
| hCoV-19/USA/WA-S18610/2022 | Omicron | EPI_ISL_10571225 | OM886670 |
| hCoV-19/USA/WA-S18606/2022 | Omicron | EPI_ISL_10571221 | OM886666 |
| hCoV-19/USA/WA-S18612/2022 | Omicron | EPI_ISL_10571227 | OM886672 |
| hCoV-19/USA/WA-S18611/2022 | Omicron | EPI_ISL_10571226 | OM886671 |
| hCoV-19/USA/WA-S18608/2022 | Omicron | EPI_ISL_10571223 | OM886668 |
| hCoV-19/USA/WA-S18607/2022 | Omicron | EPI_ISL_10571222 | OM886667 |
| hCoV-19/USA/WA-S18614/2022 | Omicron | EPI_ISL_10571229 | OM886674 |
| hCoV-19/USA/WA-S18613/2022 | Omicron | EPI_ISL_10571228 | OM886673 |
| hCoV-19/USA/WA-S18615/2022 | Omicron | EPI_ISL_10571230 | OM886675 |
| hCoV-19/USA/WA-S18616/2022 | Omicron | EPI_ISL_10571231 | OM886676 |
| hCoV-19/USA/WA-S18617/2022 | Omicron | EPI_ISL_10571232 | OM886677 |
| hCoV-19/USA/WA-S18618/2022 | Omicron | EPI_ISL_10571233 | OM886678 |
| hCoV-19/USA/WA-S18622/2022 | Omicron | EPI_ISL_10571237 | OM886682 |
| hCoV-19/USA/WA-S18621/2022 | Omicron | EPI_ISL_10571236 | OM886681 |
| hCoV-19/USA/WA-S18624/2022 | Omicron | EPI_ISL_10571239 | OM886684 |
| hCoV-19/USA/WA-S18630/2022 | Omicron | EPI_ISL_10571245 | OM886690 |
| hCoV-19/USA/WA-S18625/2022 | Omicron | EPI_ISL_10571240 | OM886685 |
| hCoV-19/USA/WA-S18628/2022 | Omicron | EPI_ISL_10571243 | OM886688 |
| hCoV-19/USA/WA-S18627/2022 | Omicron | EPI_ISL_10571242 | OM886687 |
| hCoV-19/USA/WA-S18629/2022 | Omicron | EPI_ISL_10571244 | OM886689 |
| hCoV-19/USA/WA-S18626/2022 | Omicron | EPI_ISL_10571241 | OM886686 |
| hCoV-19/USA/WA-S18631/2022 | Omicron | EPI_ISL_10571246 | OM886691 |
| hCoV-19/USA/WA-S18634/2022 | Omicron | EPI_ISL_10571249 | OM886694 |
| hCoV-19/USA/WA-S18643/2022 | Omicron | EPI_ISL_10571257 | OM886701 |
| hCoV-19/USA/WA-S18636/2022 | Omicron | EPI_ISL_10571251 | OM886696 |
| hCoV-19/USA/WA-S18644/2022 | Omicron | EPI_ISL_10571258 | OM886702 |
| hCoV-19/USA/WA-S18639/2022 | Omicron | EPI_ISL_10571254 | OM886698 |
| hCoV-19/USA/WA-S18635/2022 | Omicron | EPI_ISL_10571250 | OM886695 |
| hCoV-19/USA/WA-S18642/2022 | Omicron | EPI_ISL_10571256 | OM886700 |
| hCoV-19/USA/WA-S18645/2022 | Omicron | EPI_ISL_10571259 | OM886703 |

|                            |         |                  |          |
|----------------------------|---------|------------------|----------|
| hCoV-19/USA/WA-S18641/2022 | Omicron | EPI_ISL_10571255 | OM886699 |
| hCoV-19/USA/WA-S18637/2022 | Omicron | EPI_ISL_10571252 | OP209800 |
| hCoV-19/USA/WA-S18638/2022 | Omicron | EPI_ISL_10571253 | OM886697 |
